# Supplementary material for: Design and Synthesis of Novel Amino and Acetamidoaurones with Antimicrobial Activities
Source: MDPI journal article supplement (doi:10.3390/antibiotics13040300), 2024-03-26

# Design and Synthesis of novel amino and acetamidoaurones with antimicrobial activities.

Attilio Di Maio <sup>1,#</sup>, Hamza Olleik <sup>2,#</sup>, Elise Courvoisier-Dezord <sup>2</sup>, Sophie Guillier <sup>3</sup>, Fabienne Ripoll <sup>3</sup>, Romain Haudecoeur <sup>4</sup>, Jean-Michel Bolla <sup>3</sup>, Magali Casanova <sup>5</sup>, Jean-François Cavalier <sup>5</sup>, Stéphane Canaan <sup>5</sup>, Valérie Pique <sup>1</sup>, Yolande Charmasson <sup>2</sup>, Elias Baydoun <sup>6</sup>, Akram Hijazi <sup>7</sup>, Josette Perrier <sup>2</sup>, Marc Maresca <sup>2,\*</sup>, Maxime Robin <sup>1,\*</sup>

NMR Spectra of compounds 4-34

*N*-[(2*Z*)-2-(2-methoxybenzylidene)-3-oxo-2,3-dihydro-1-benzofuran-5-yl]acetamide

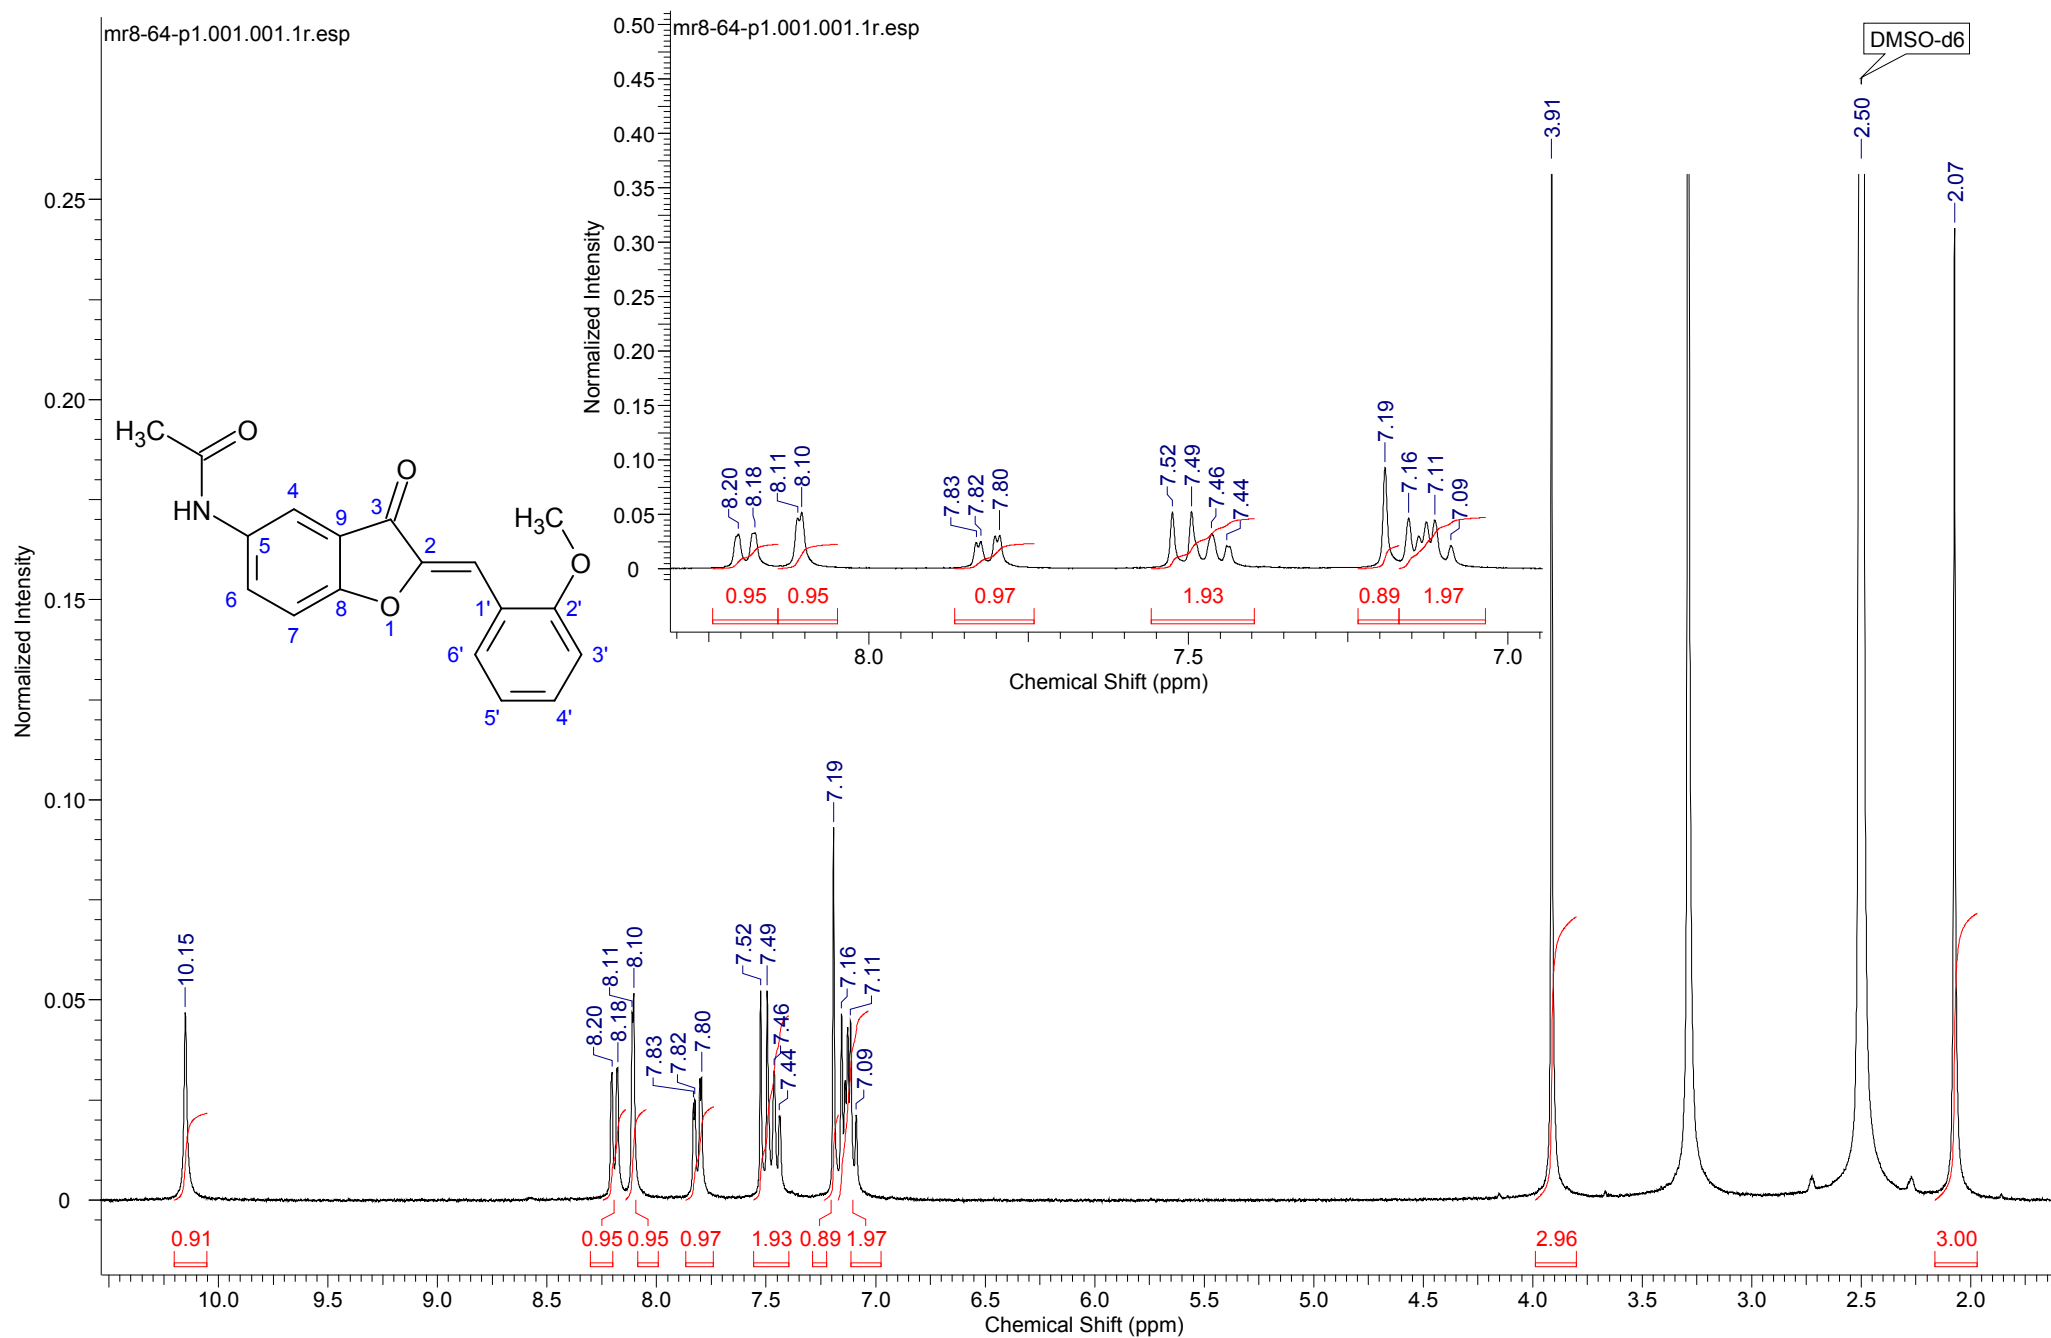

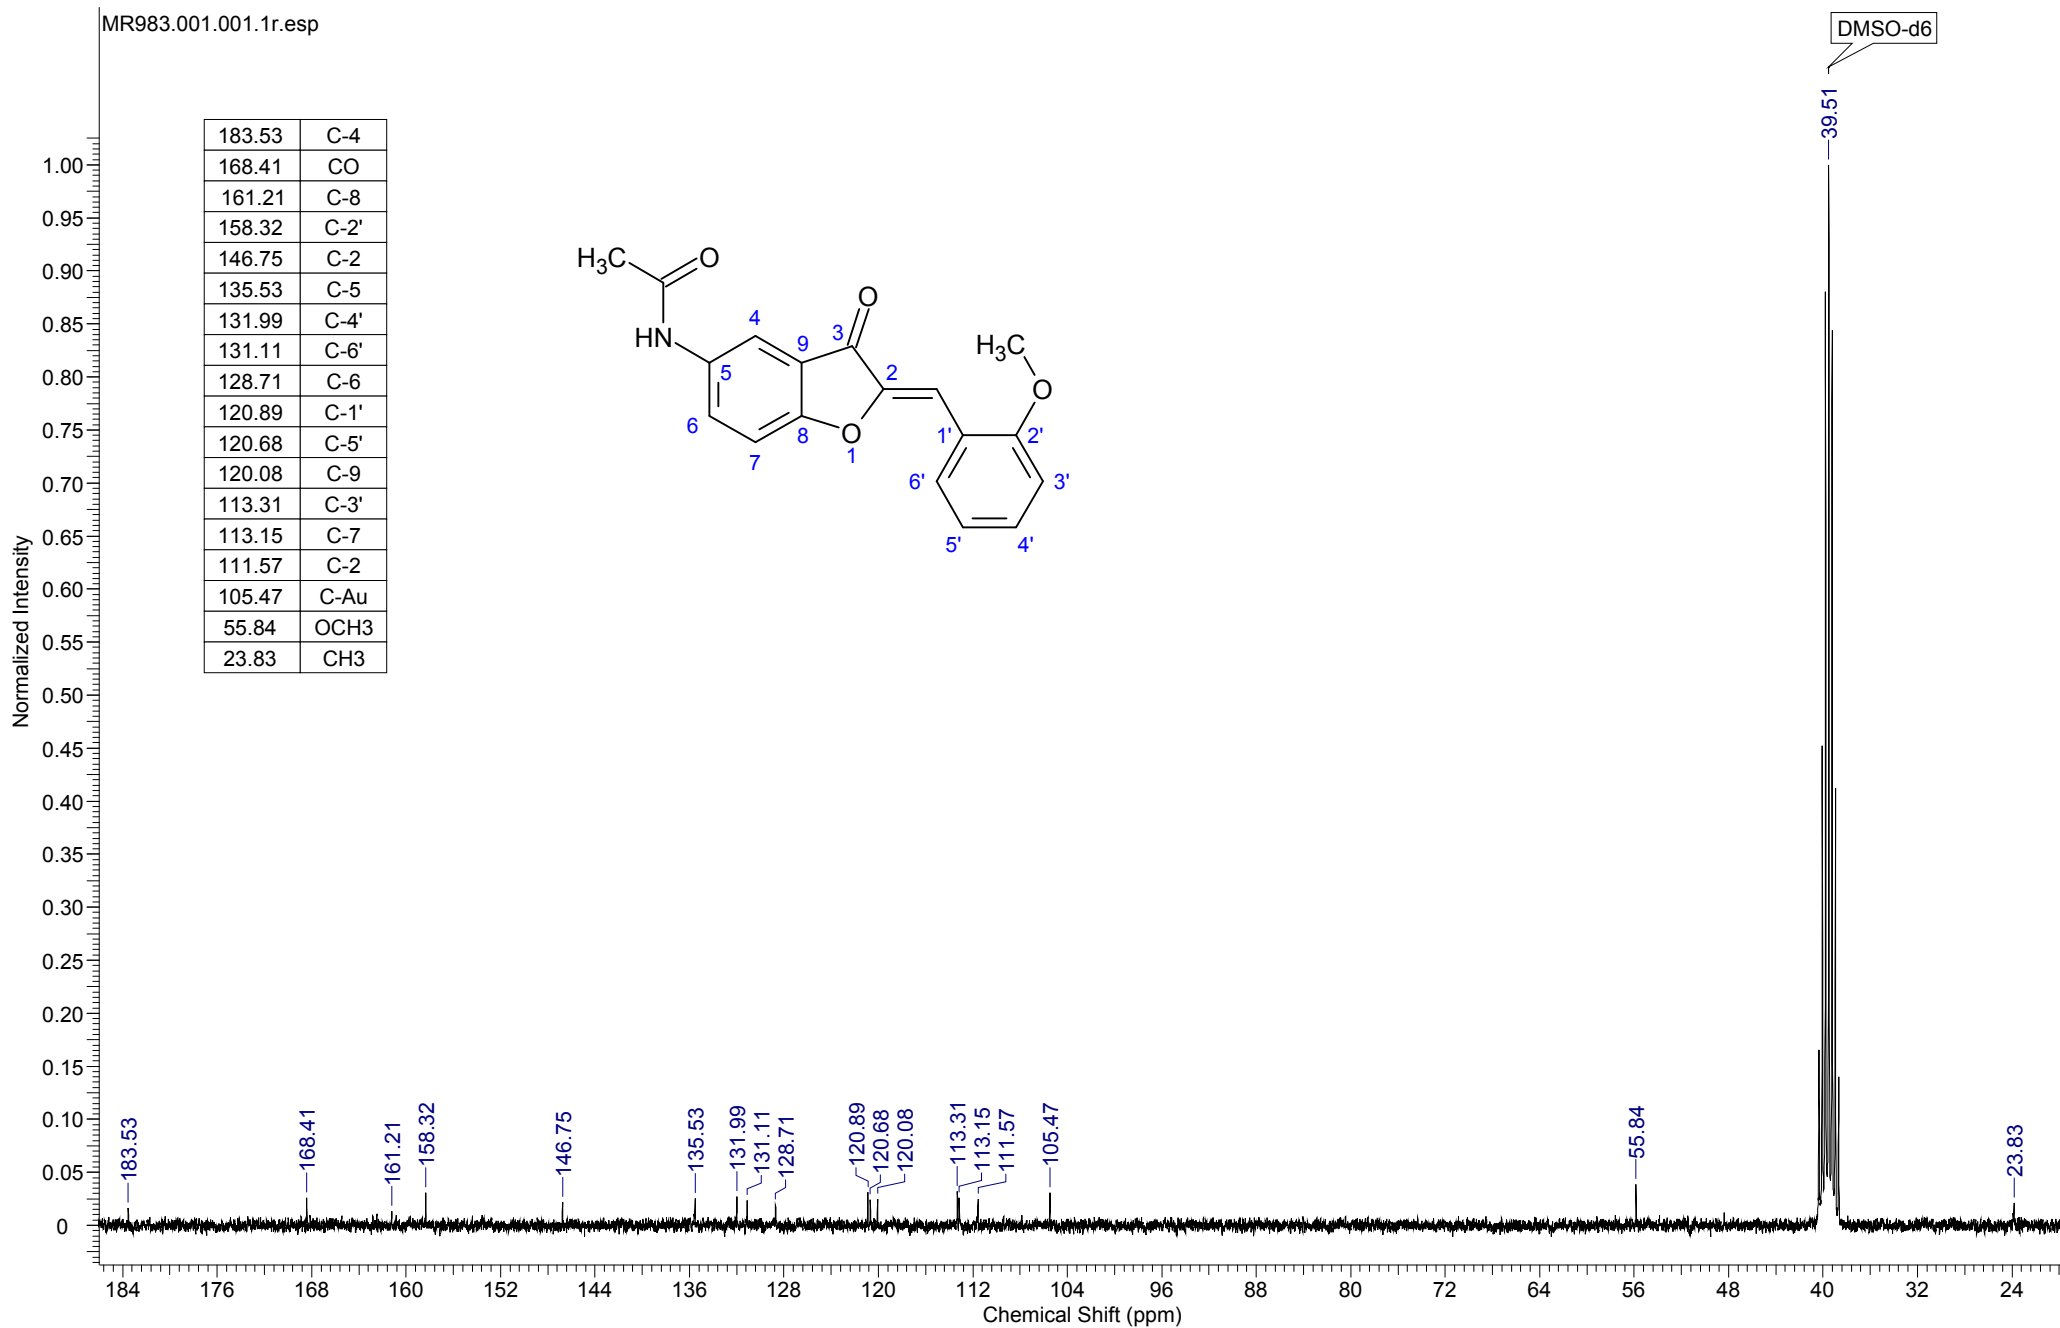

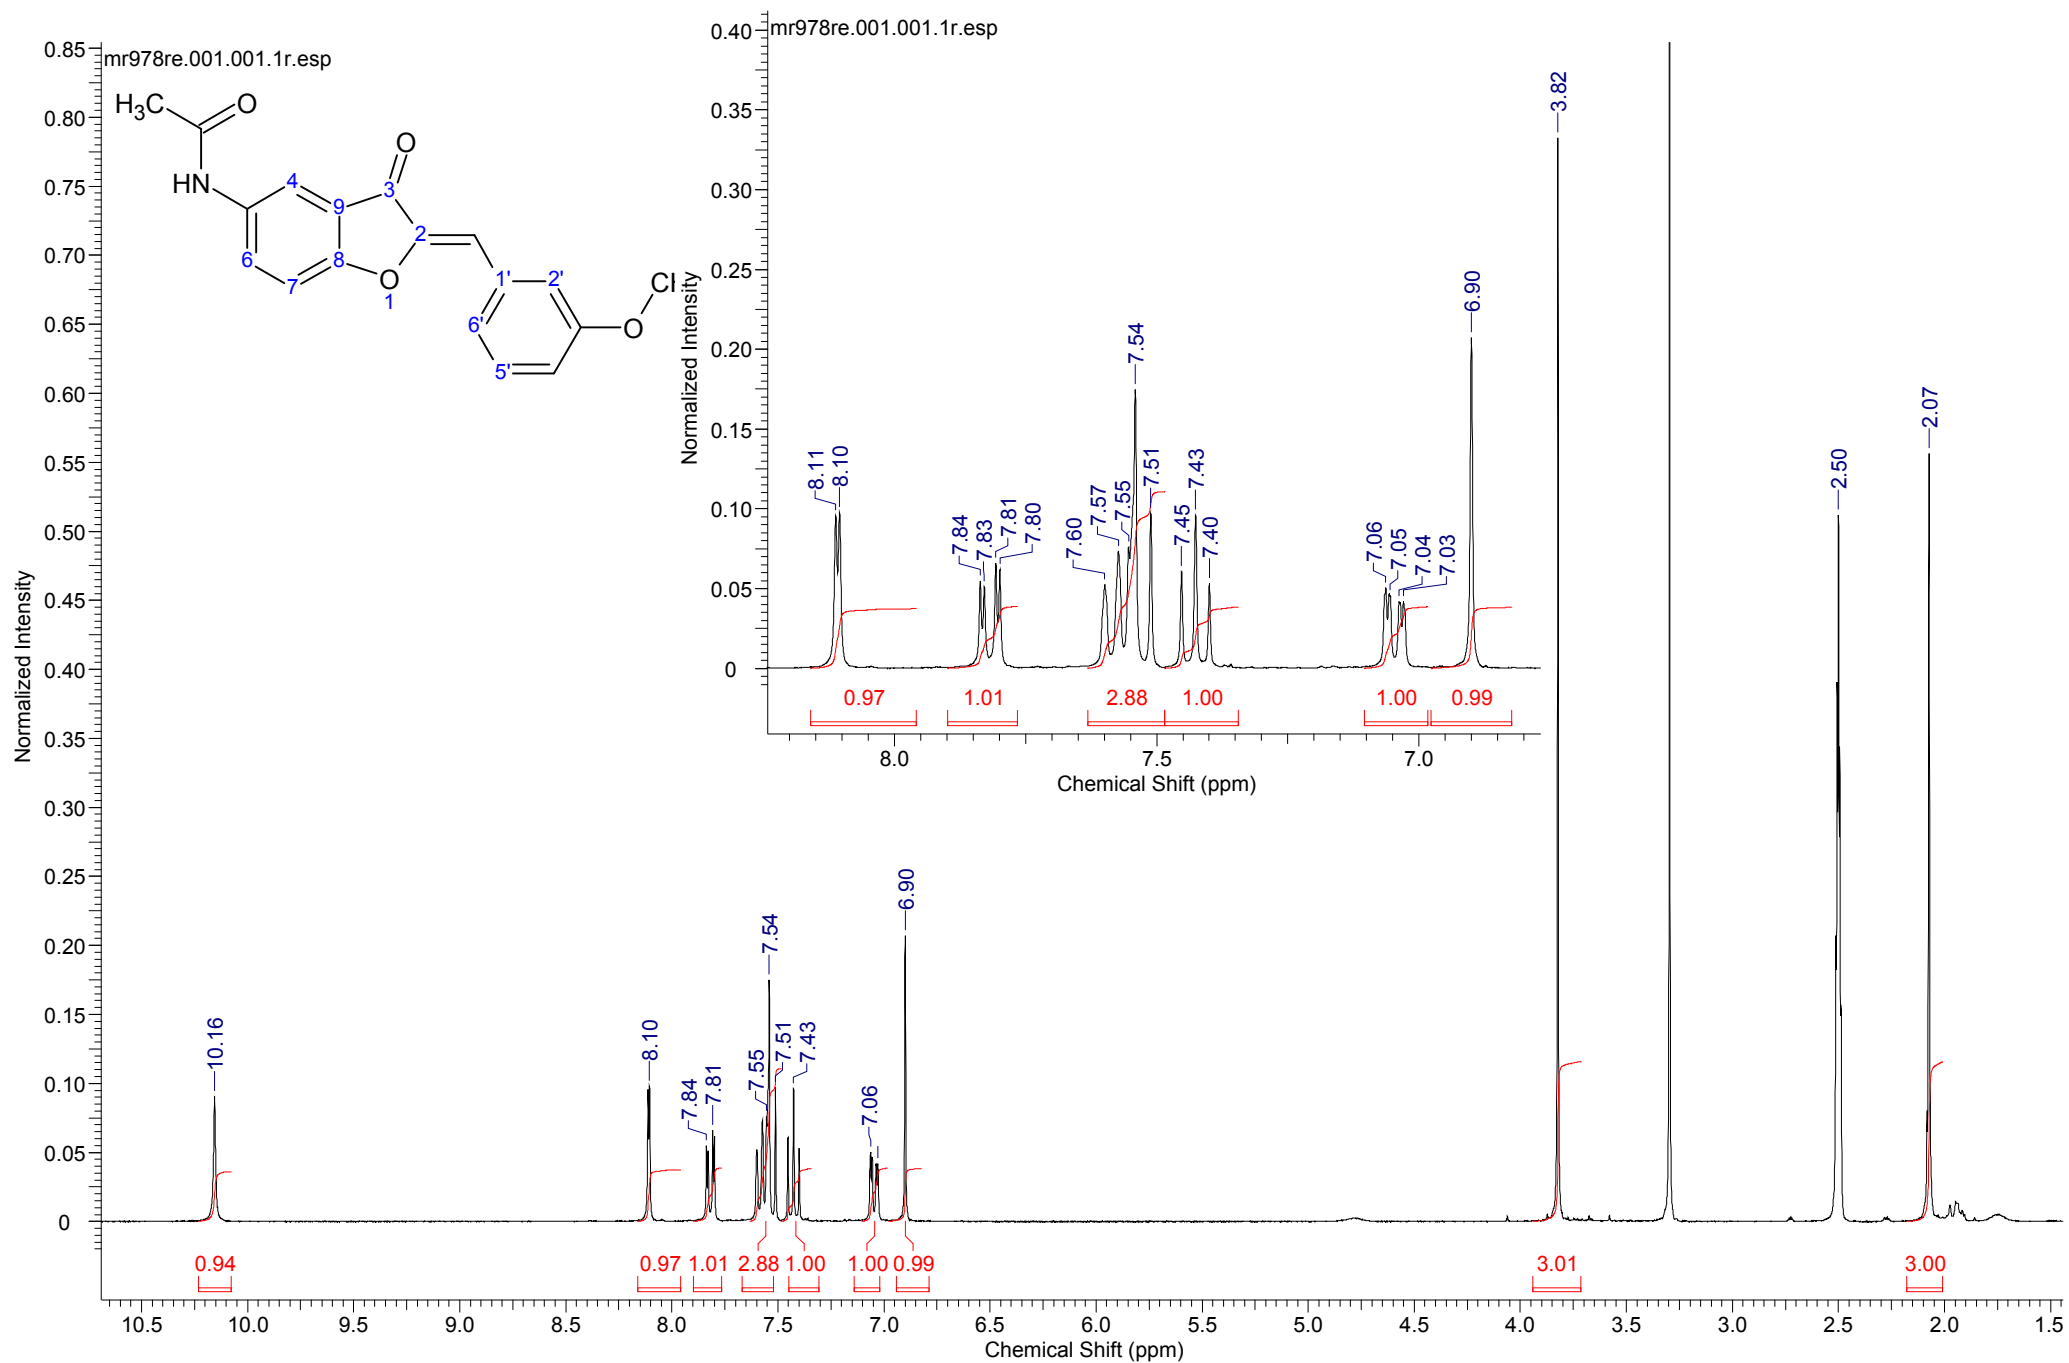

MR978REC.001.001.1r.esp

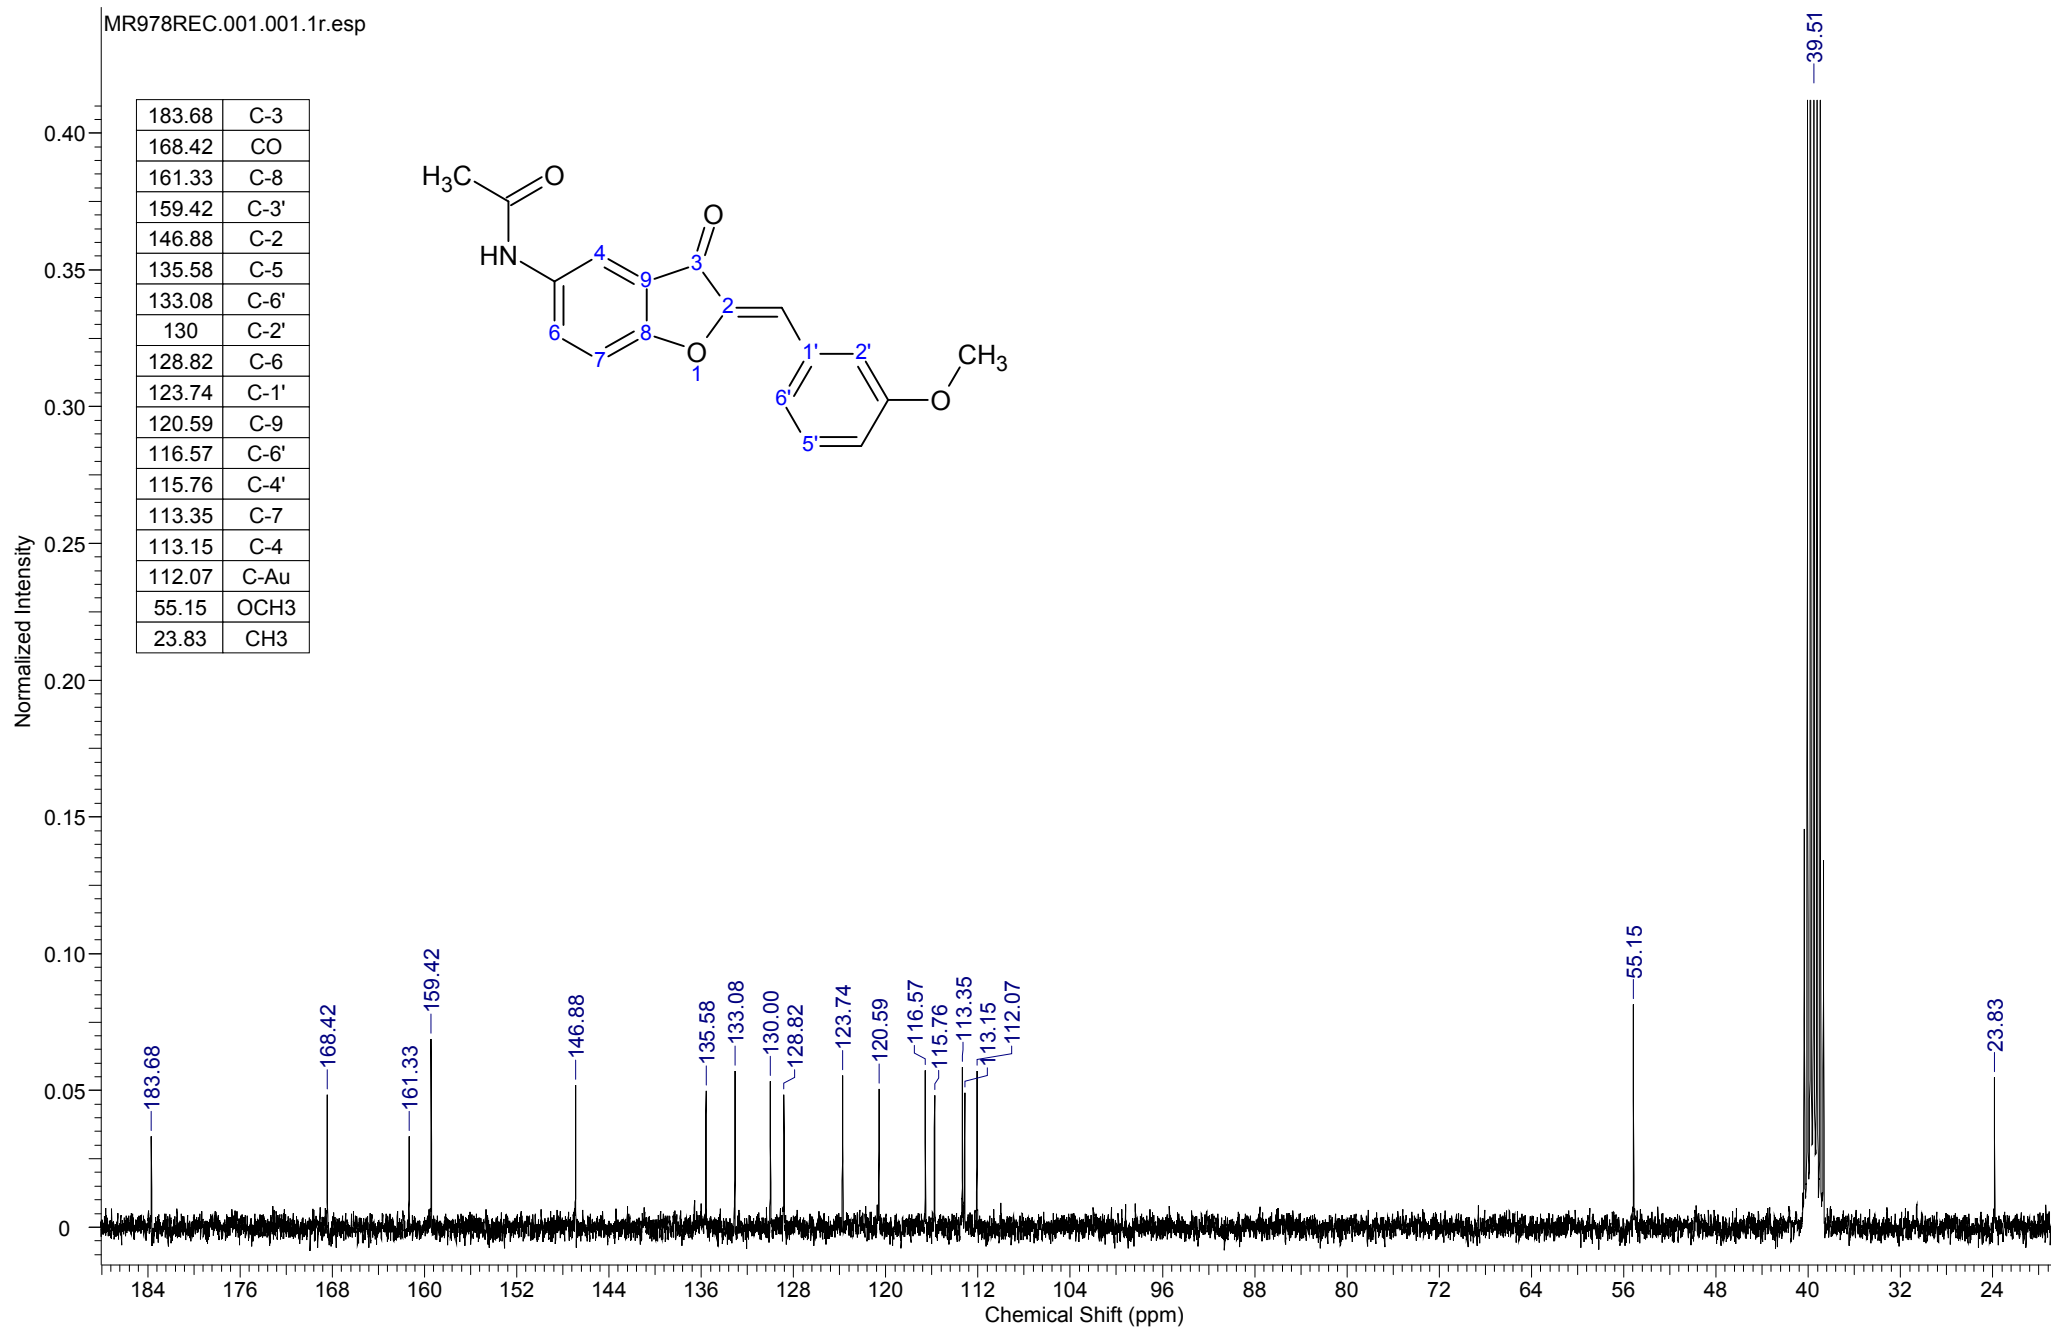

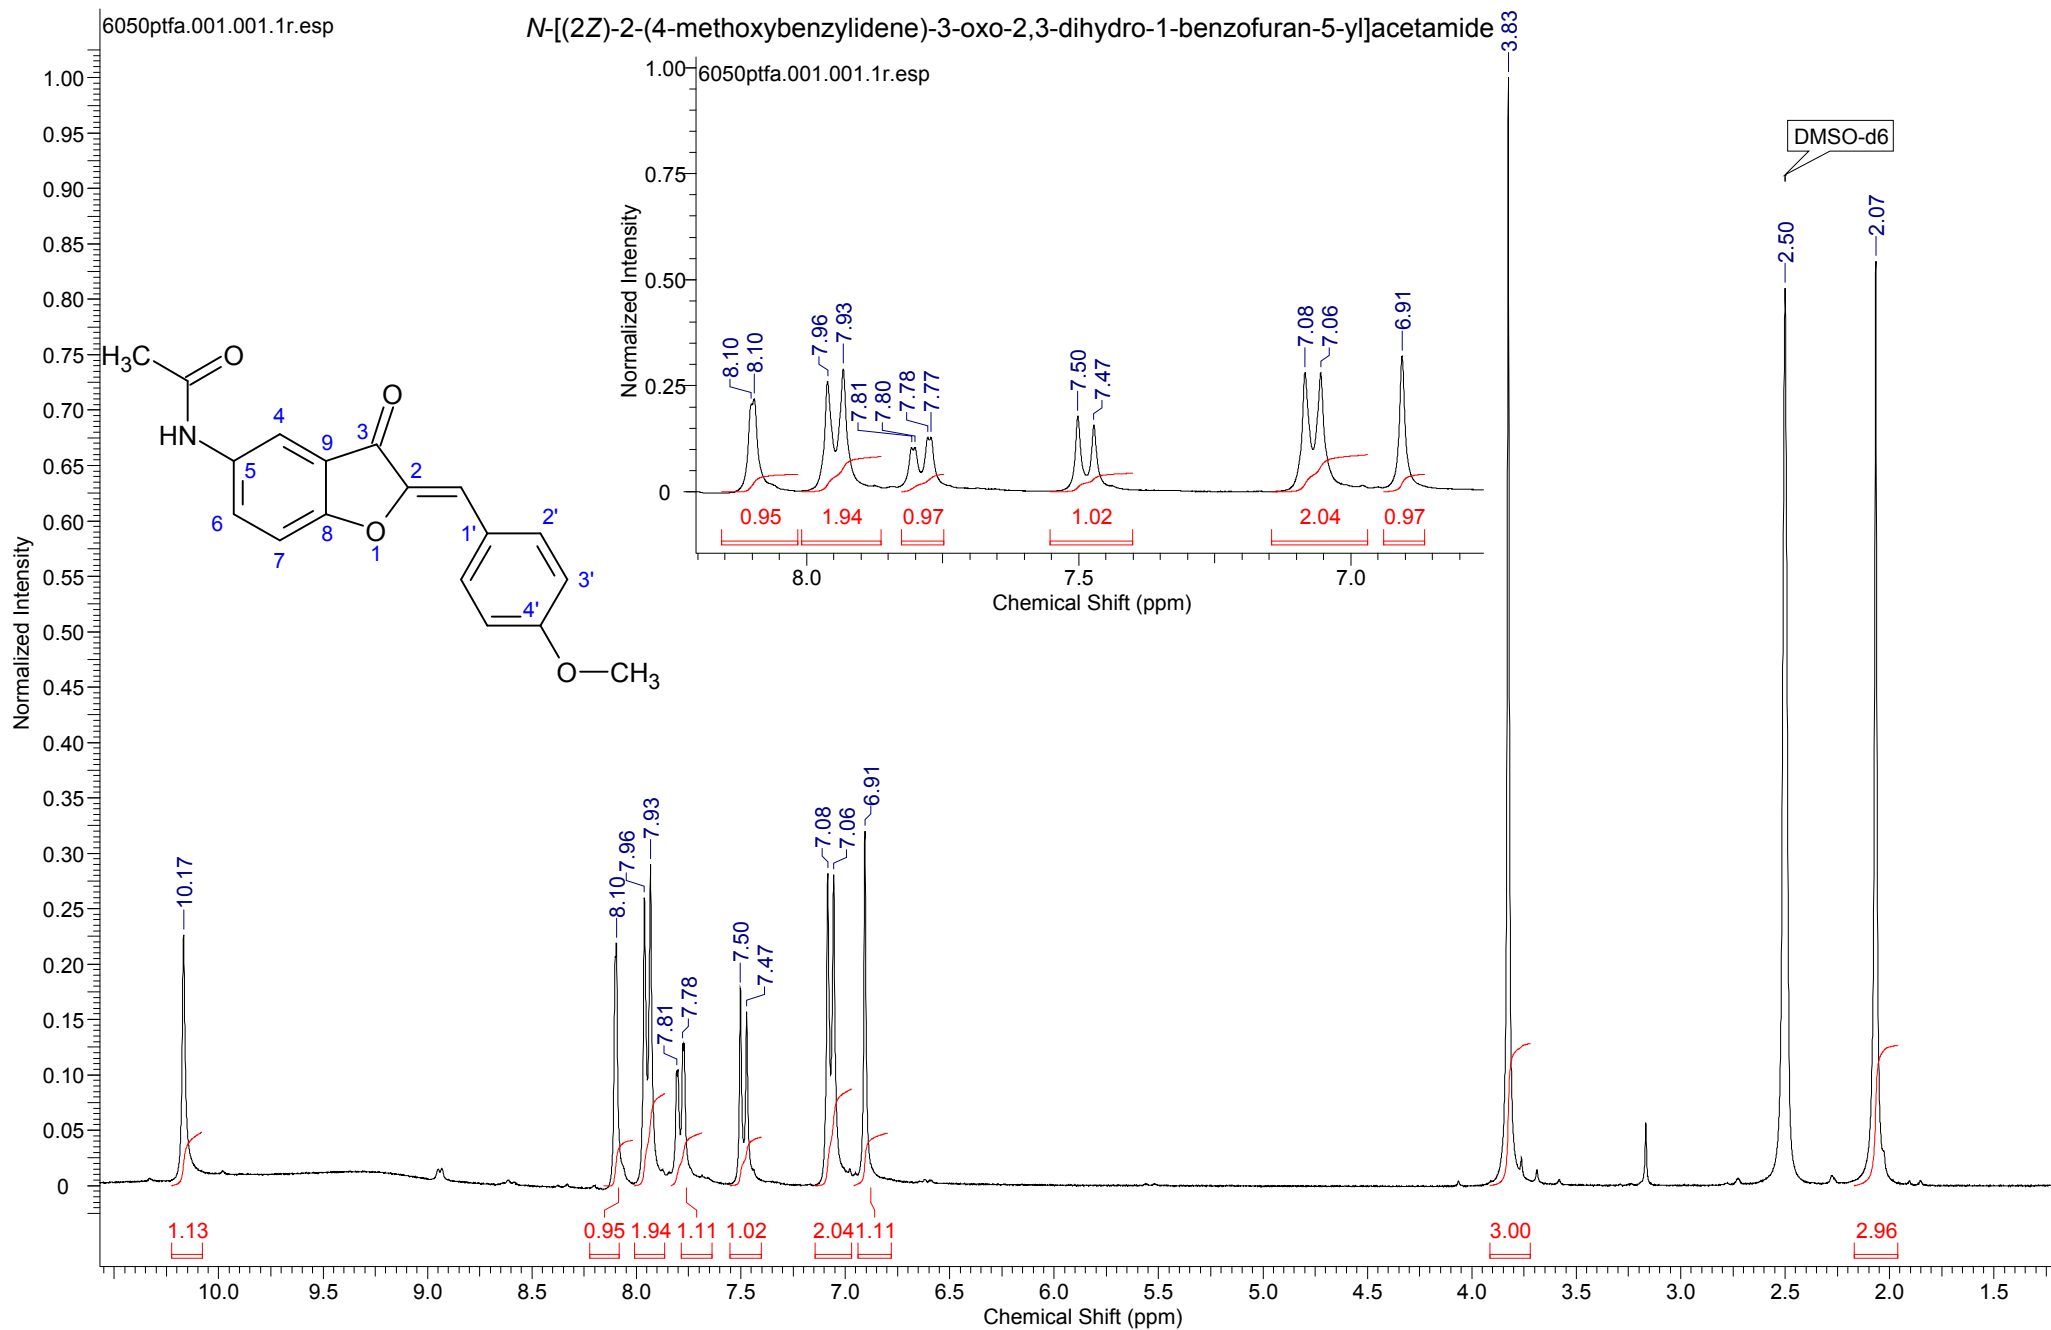

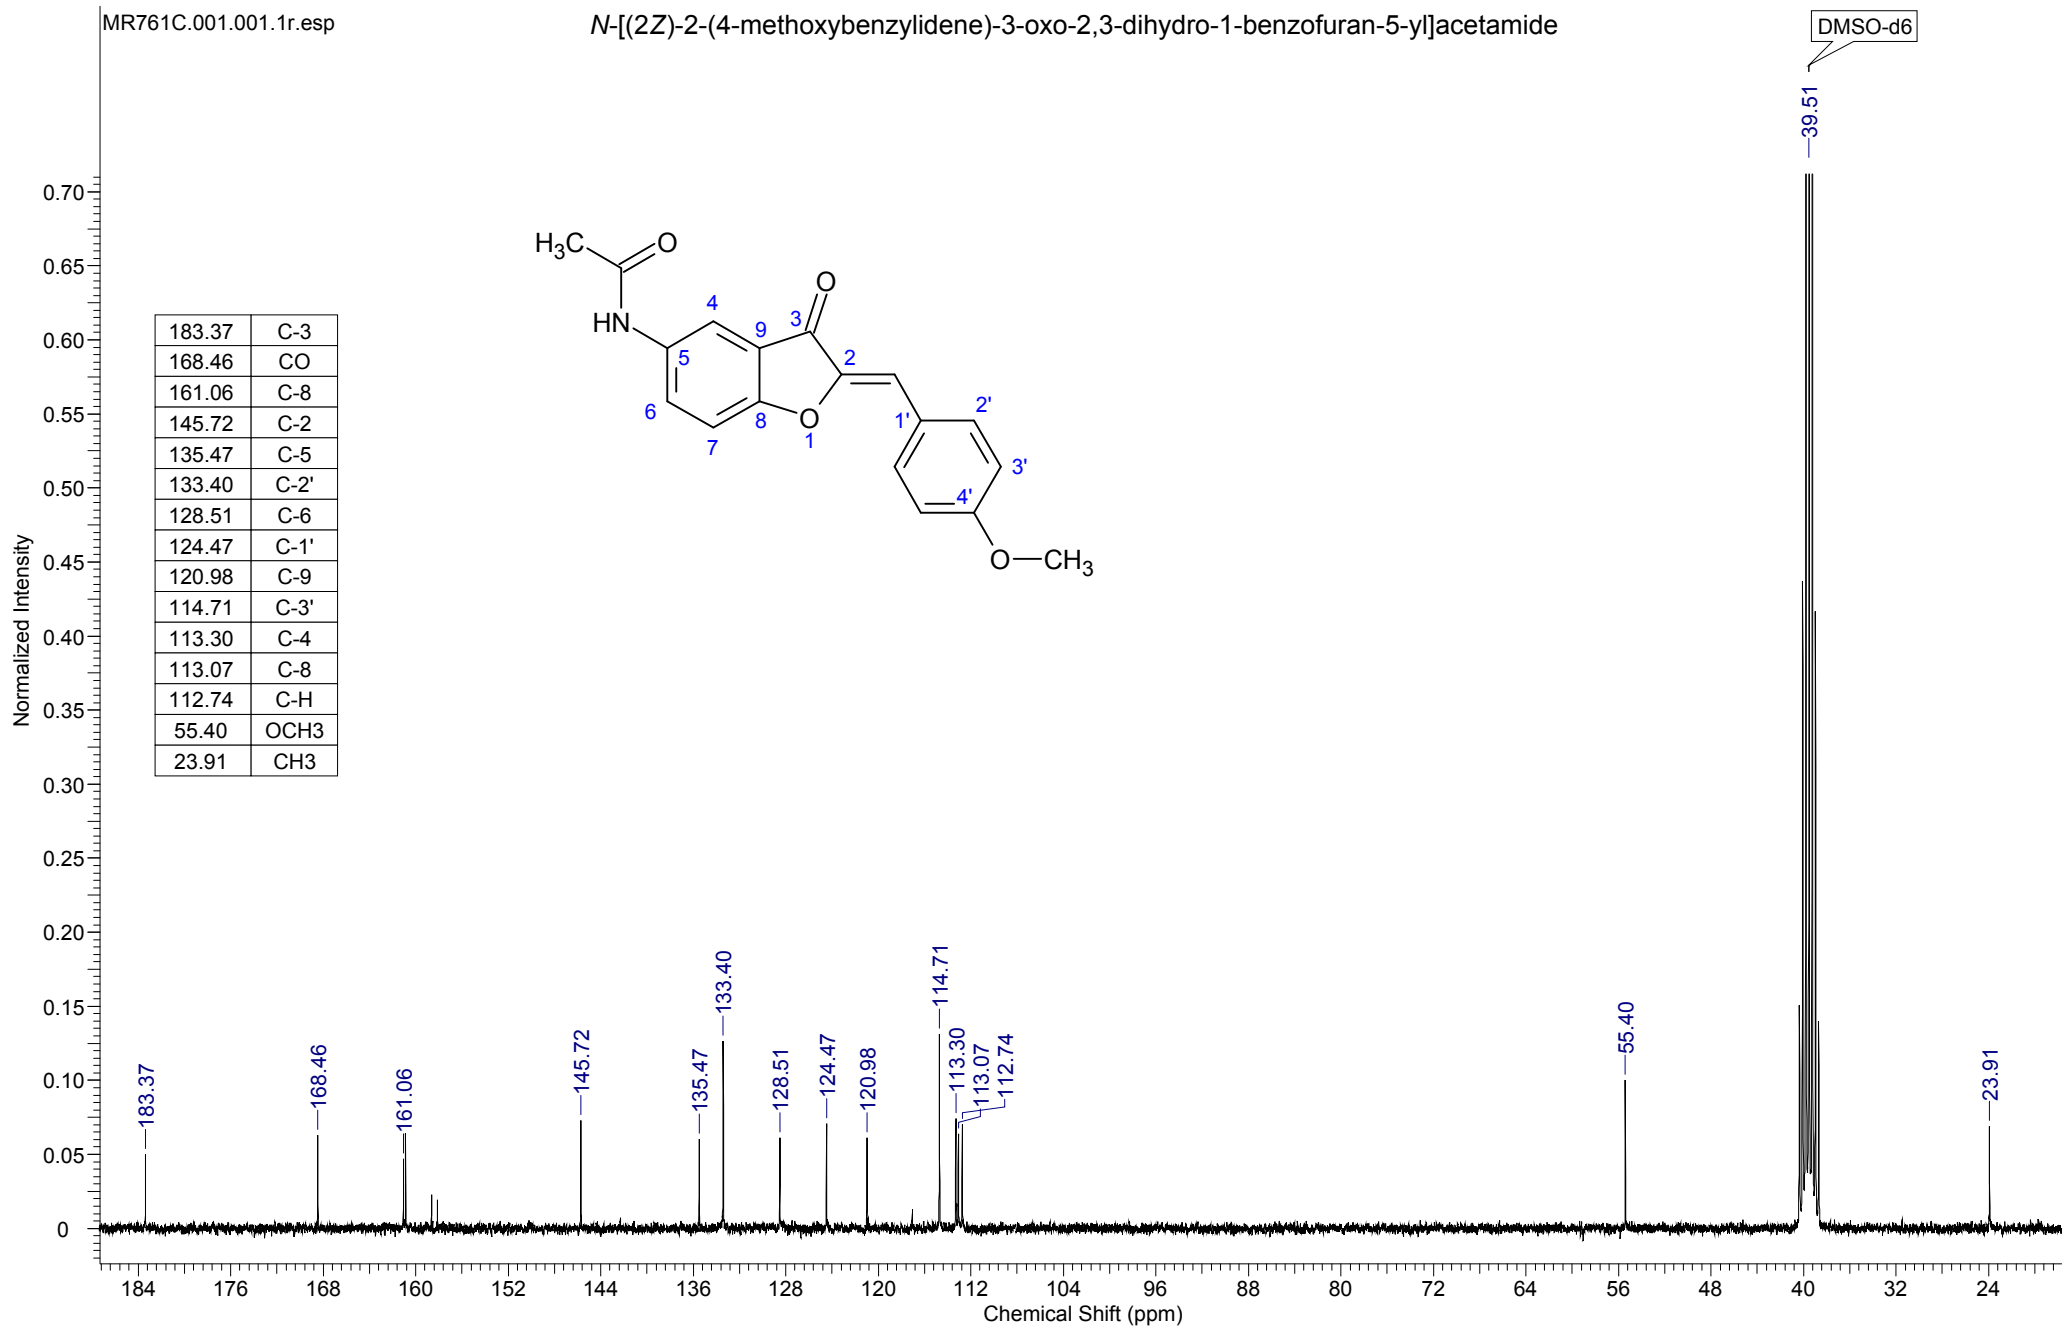

(2Z)-5-amino-2-(2-methoxybenzylidene)-1-benzofuran-3(2H)-one

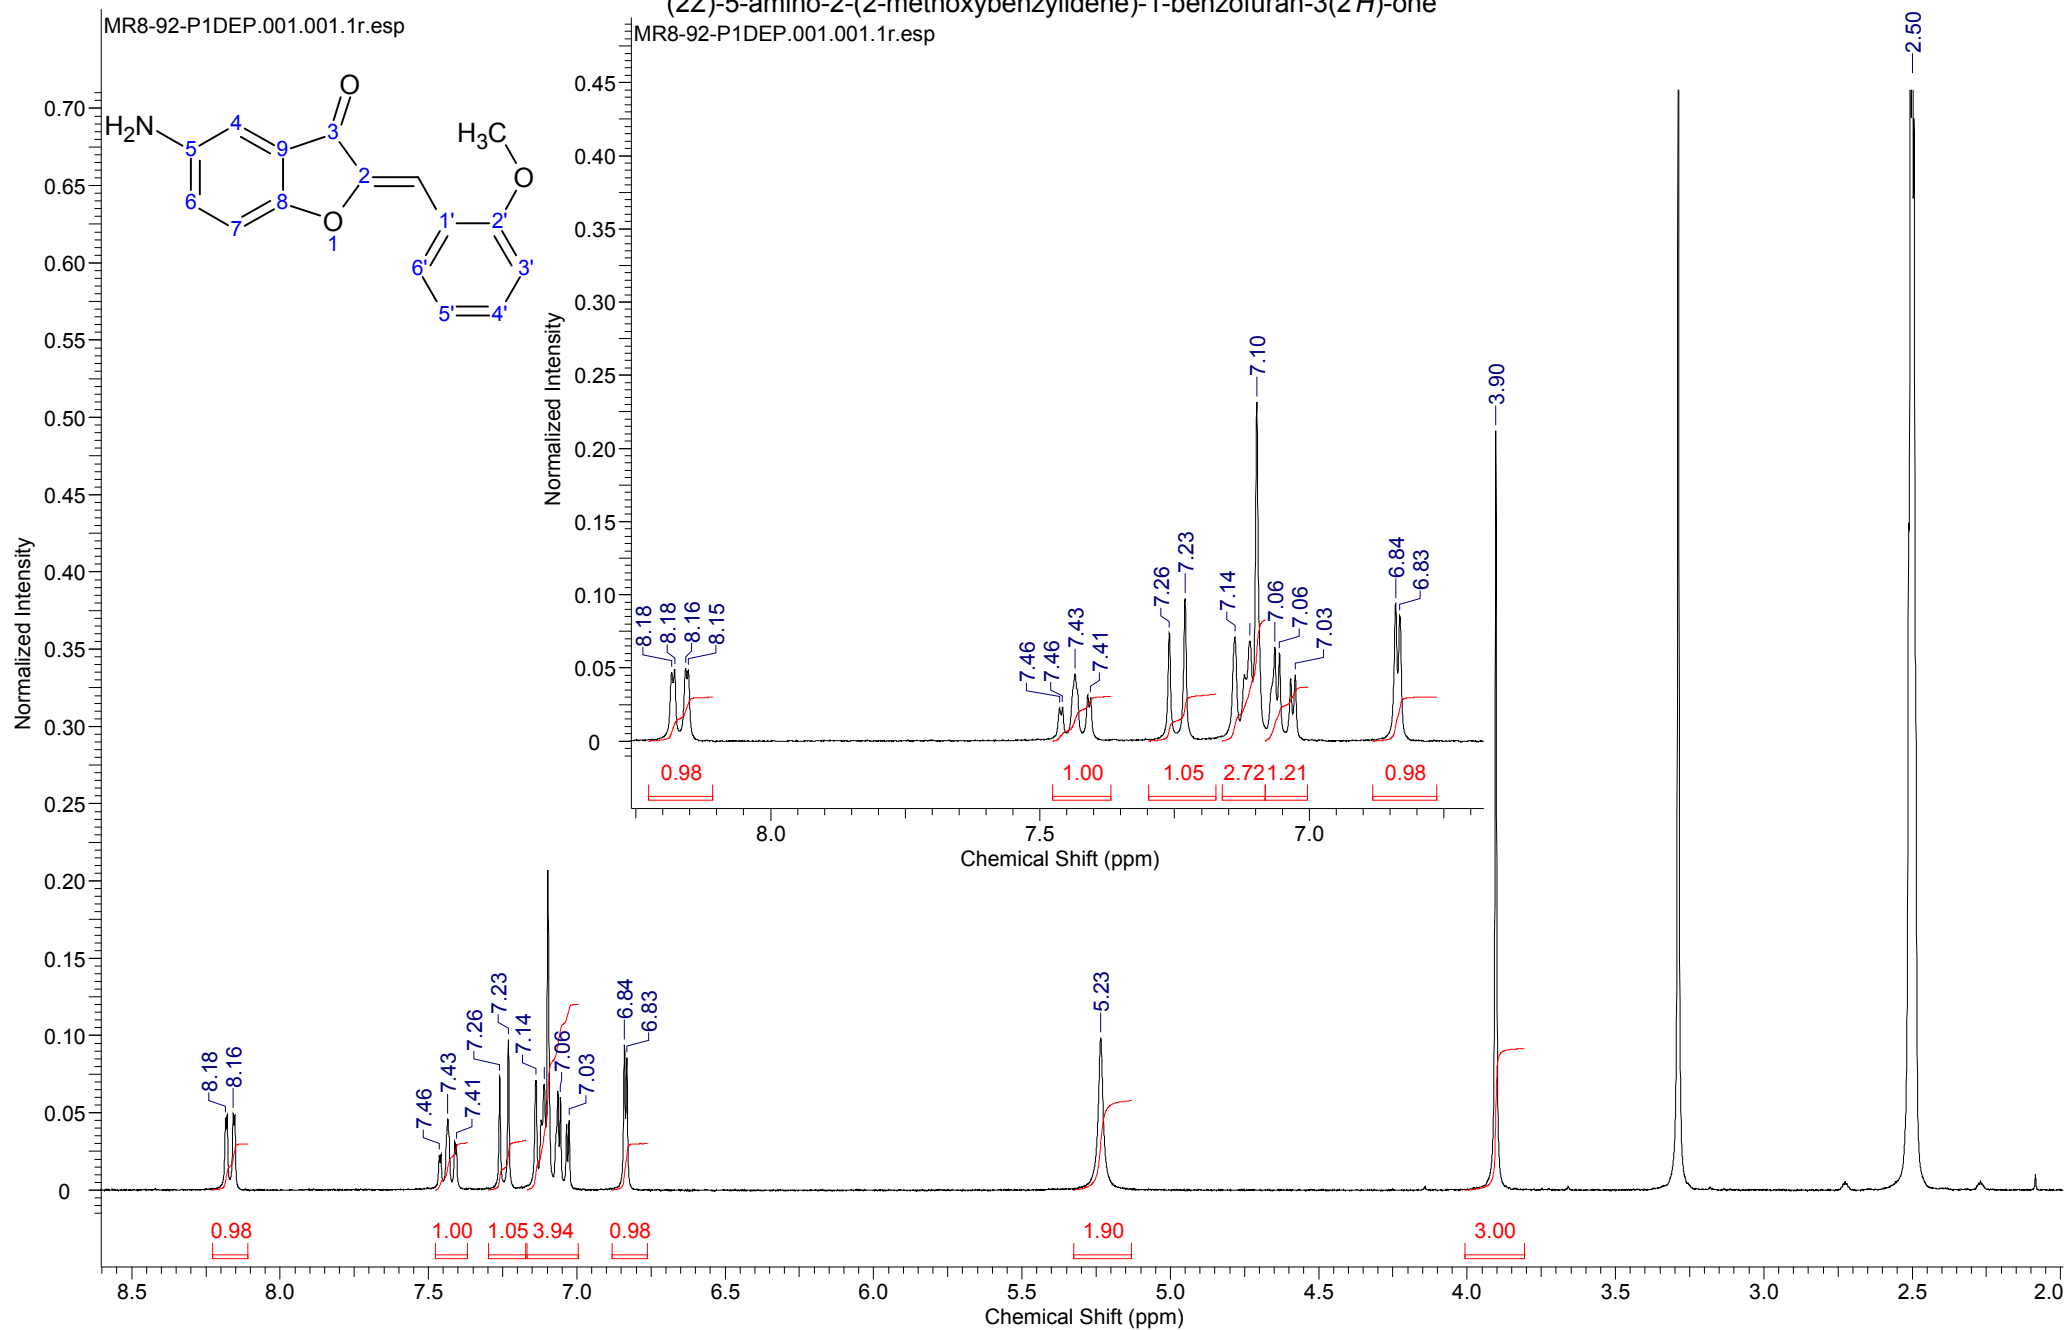



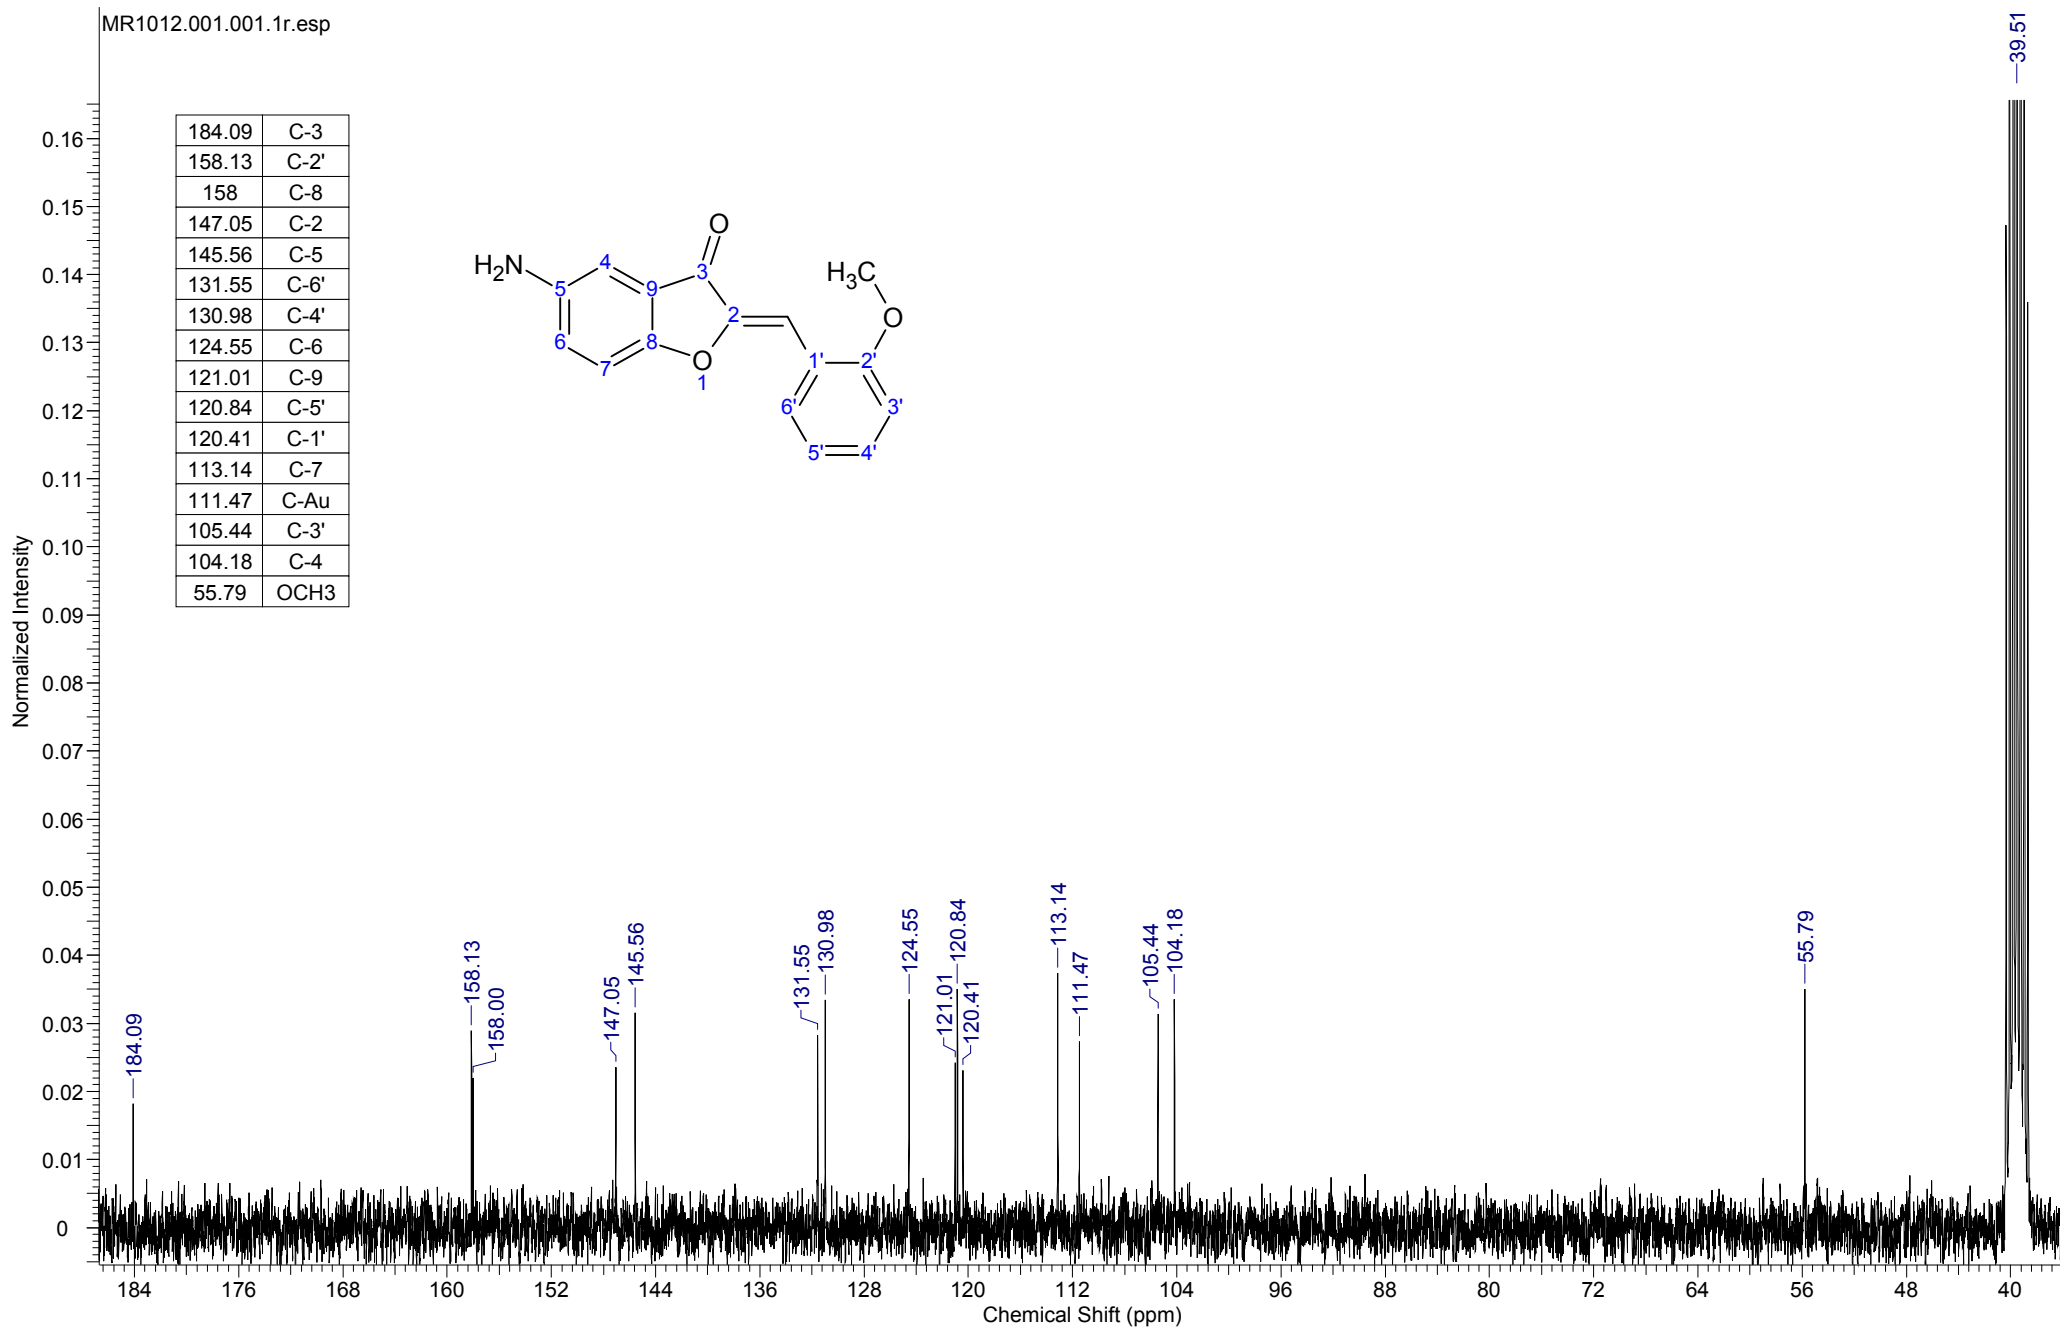

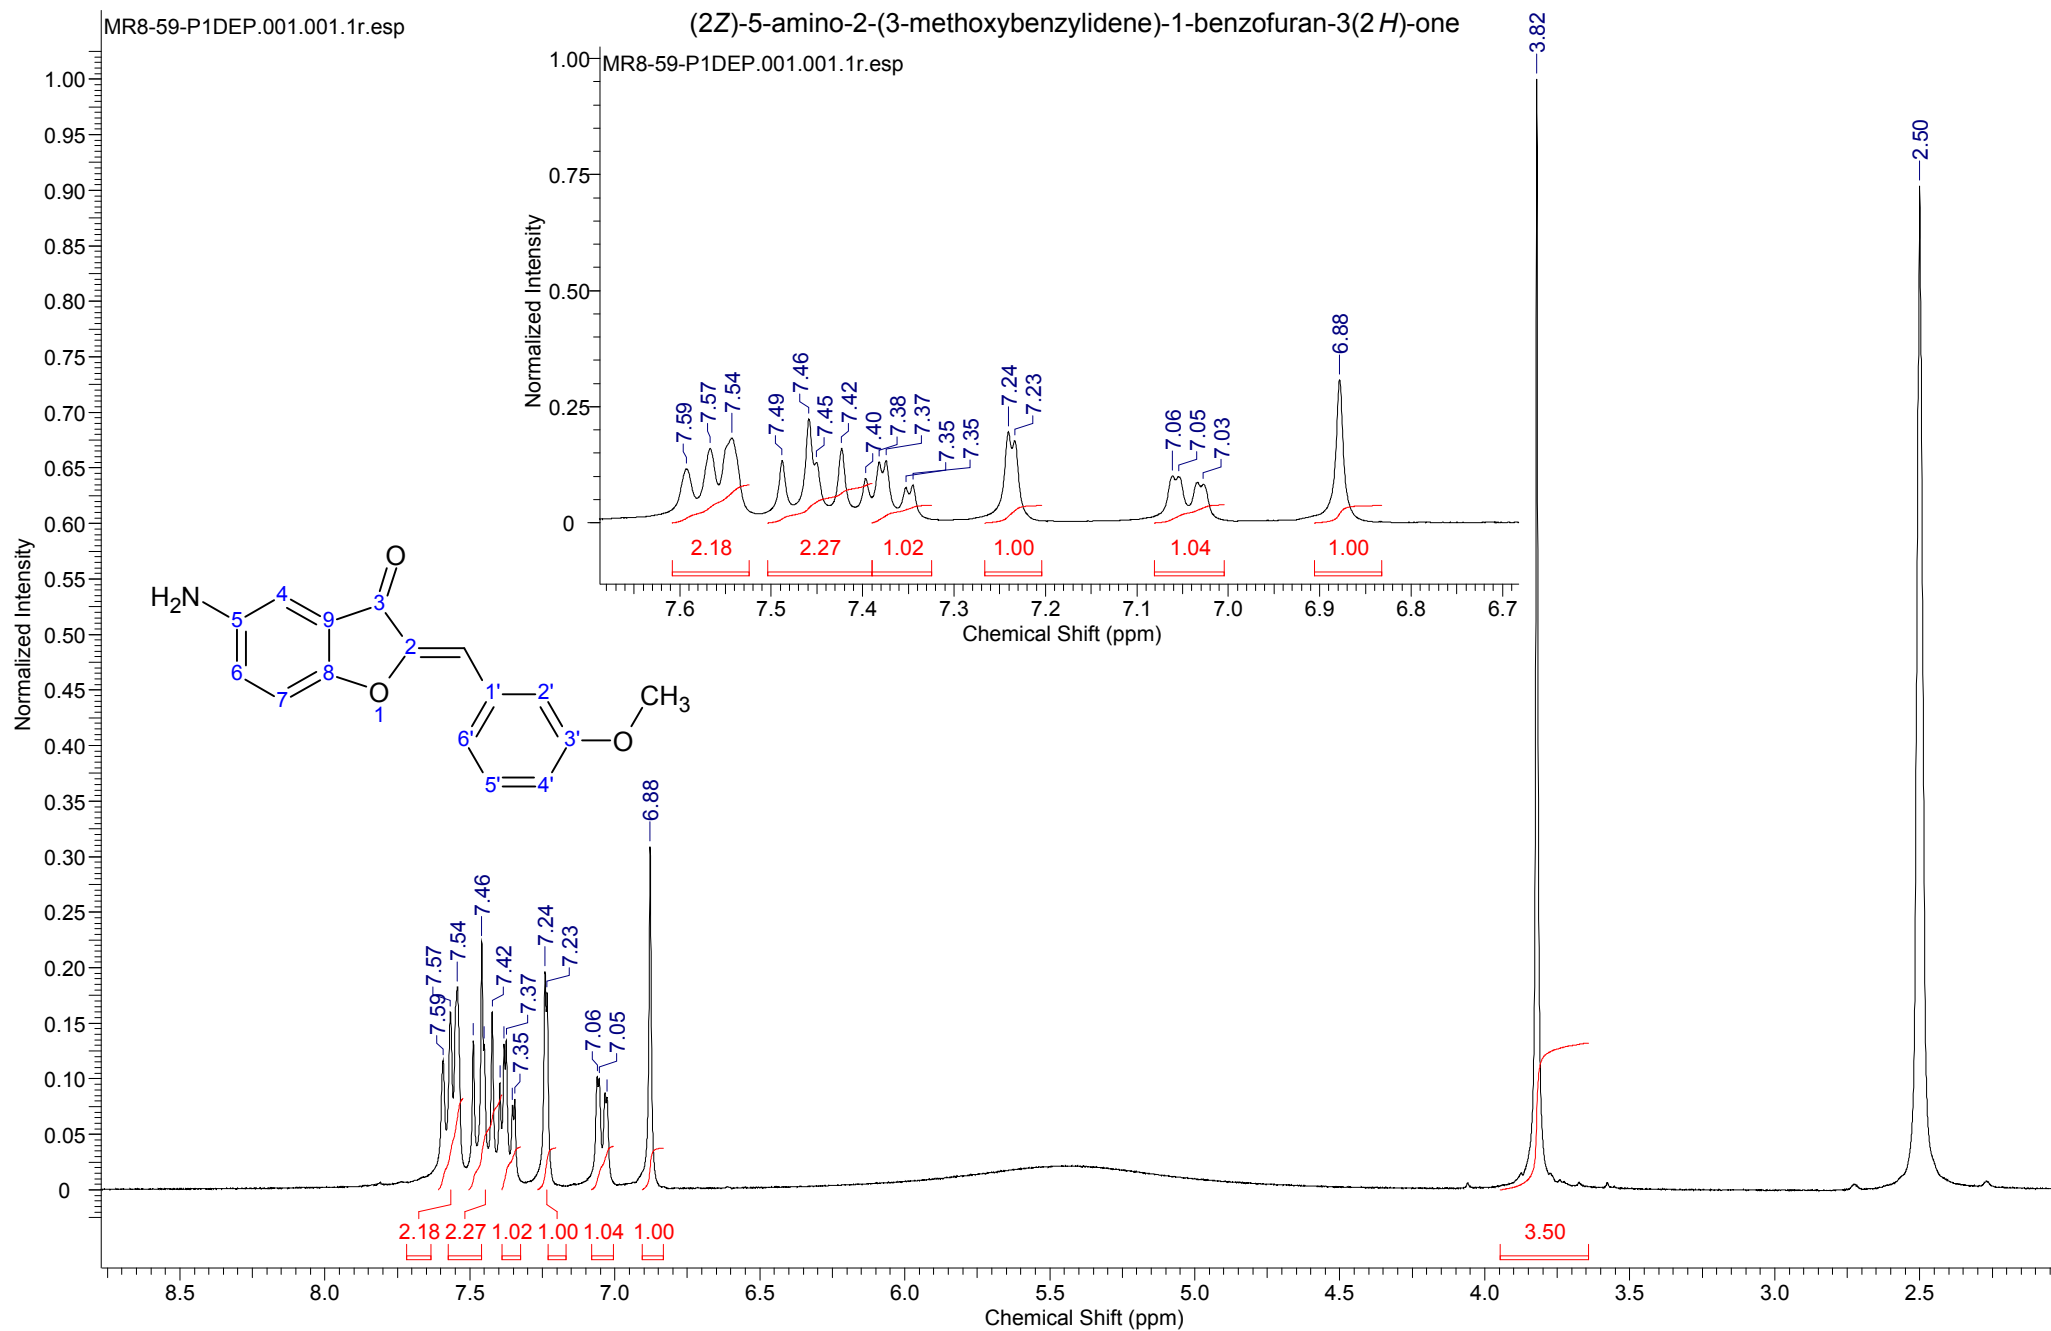

MR8-59-P1DEP.002.001.1r.esp

Normalized Intensity

|        |      |
|--------|------|
| 183.6  | C-4  |
| 160.79 | C-8  |
| 159.42 | C-3' |
| 146.96 | C-2  |
| 137.91 | C-5' |
| 133.13 | C-1' |
| 129.99 | C-5' |
| 127.97 | C-6  |
| 123.71 | C-7  |
| 121.18 | C-9  |
| 116.54 | C-6' |
| 115.72 | C-4' |
| 113.87 | C-4  |
| 111.88 | C-2' |
| 111.18 | C-Au |
| 55.16  | OCH3 |

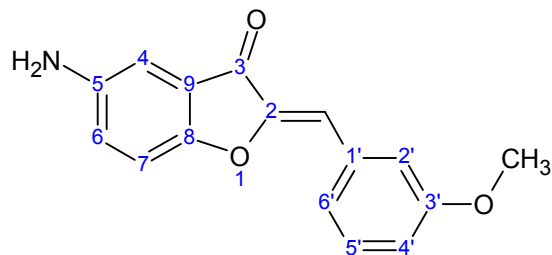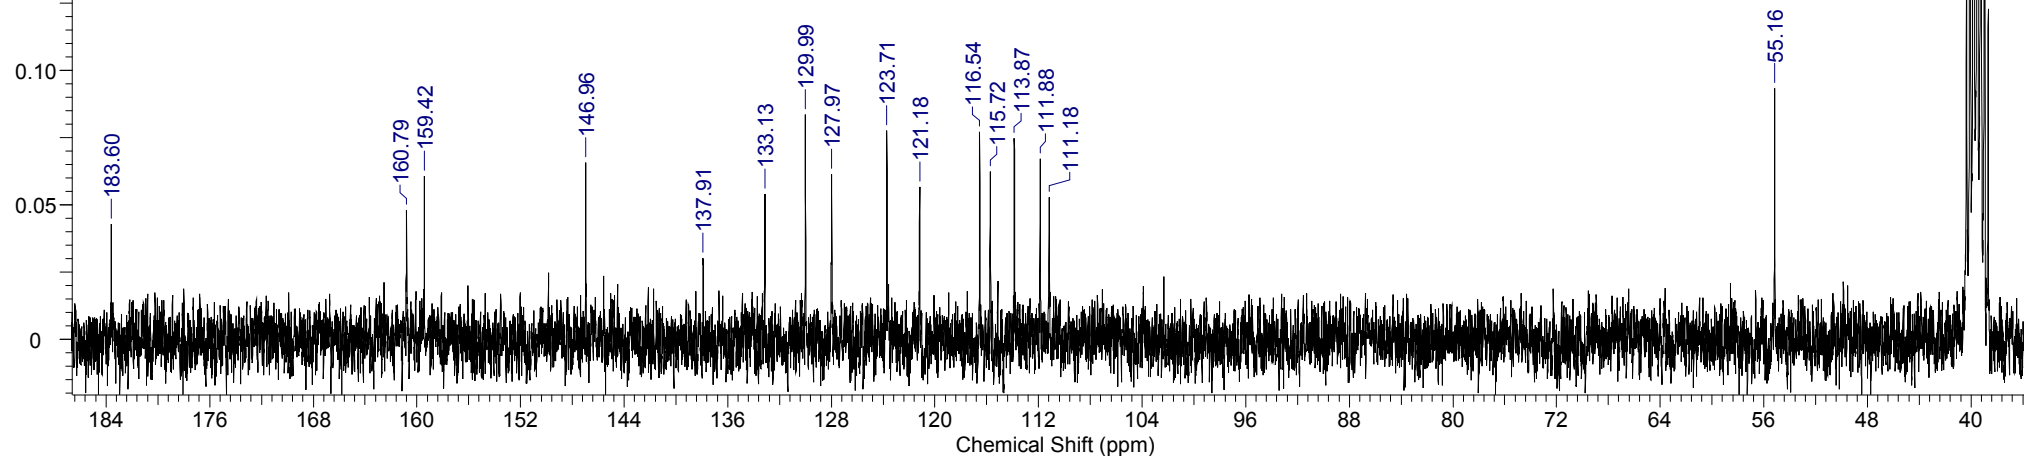

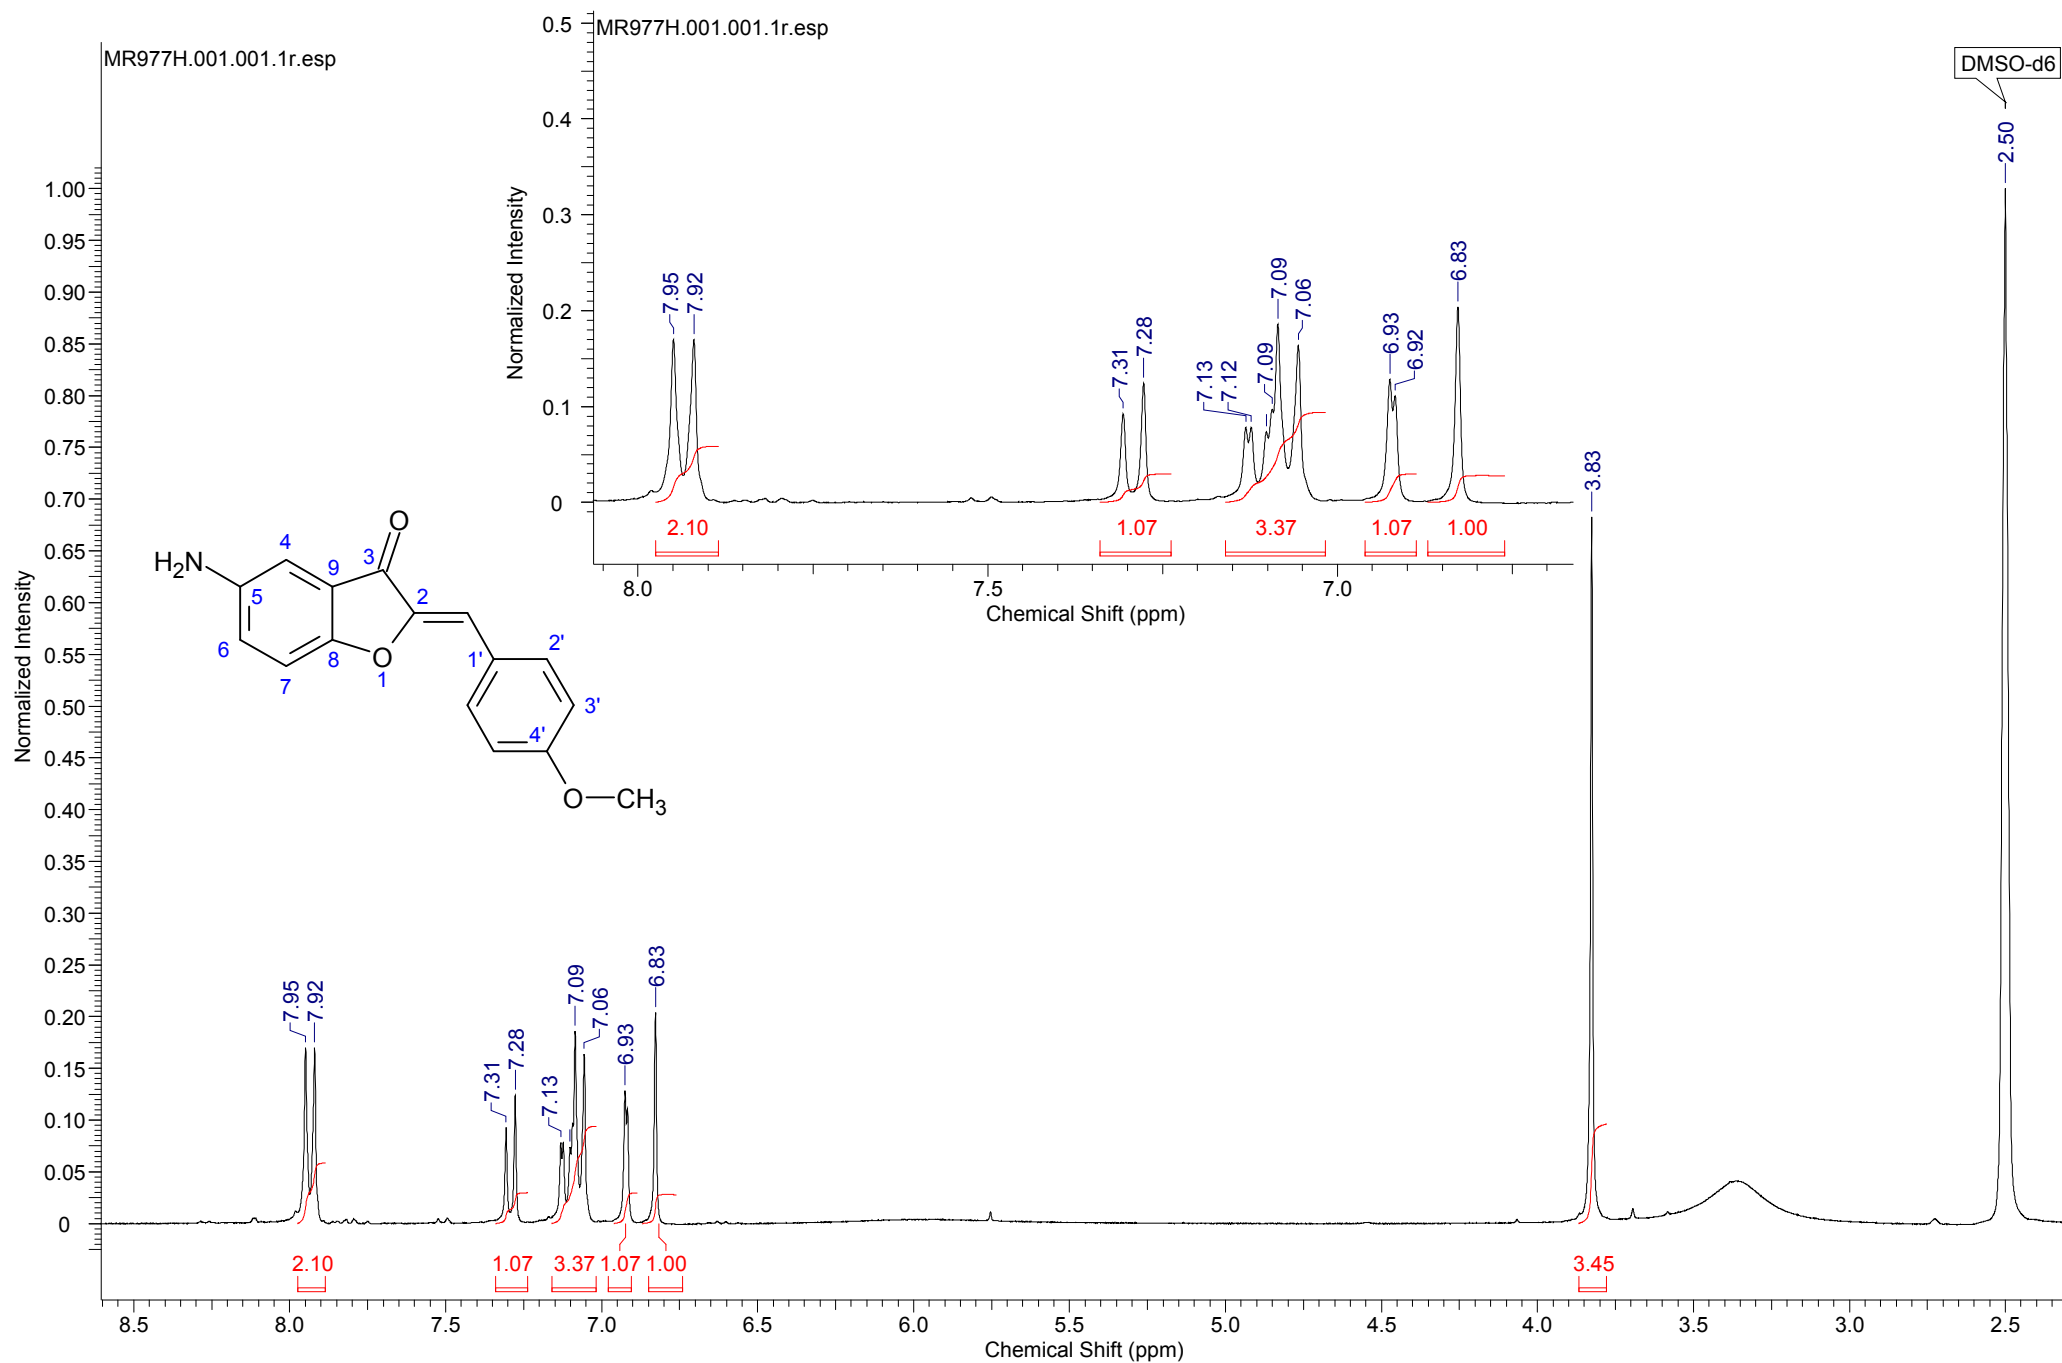

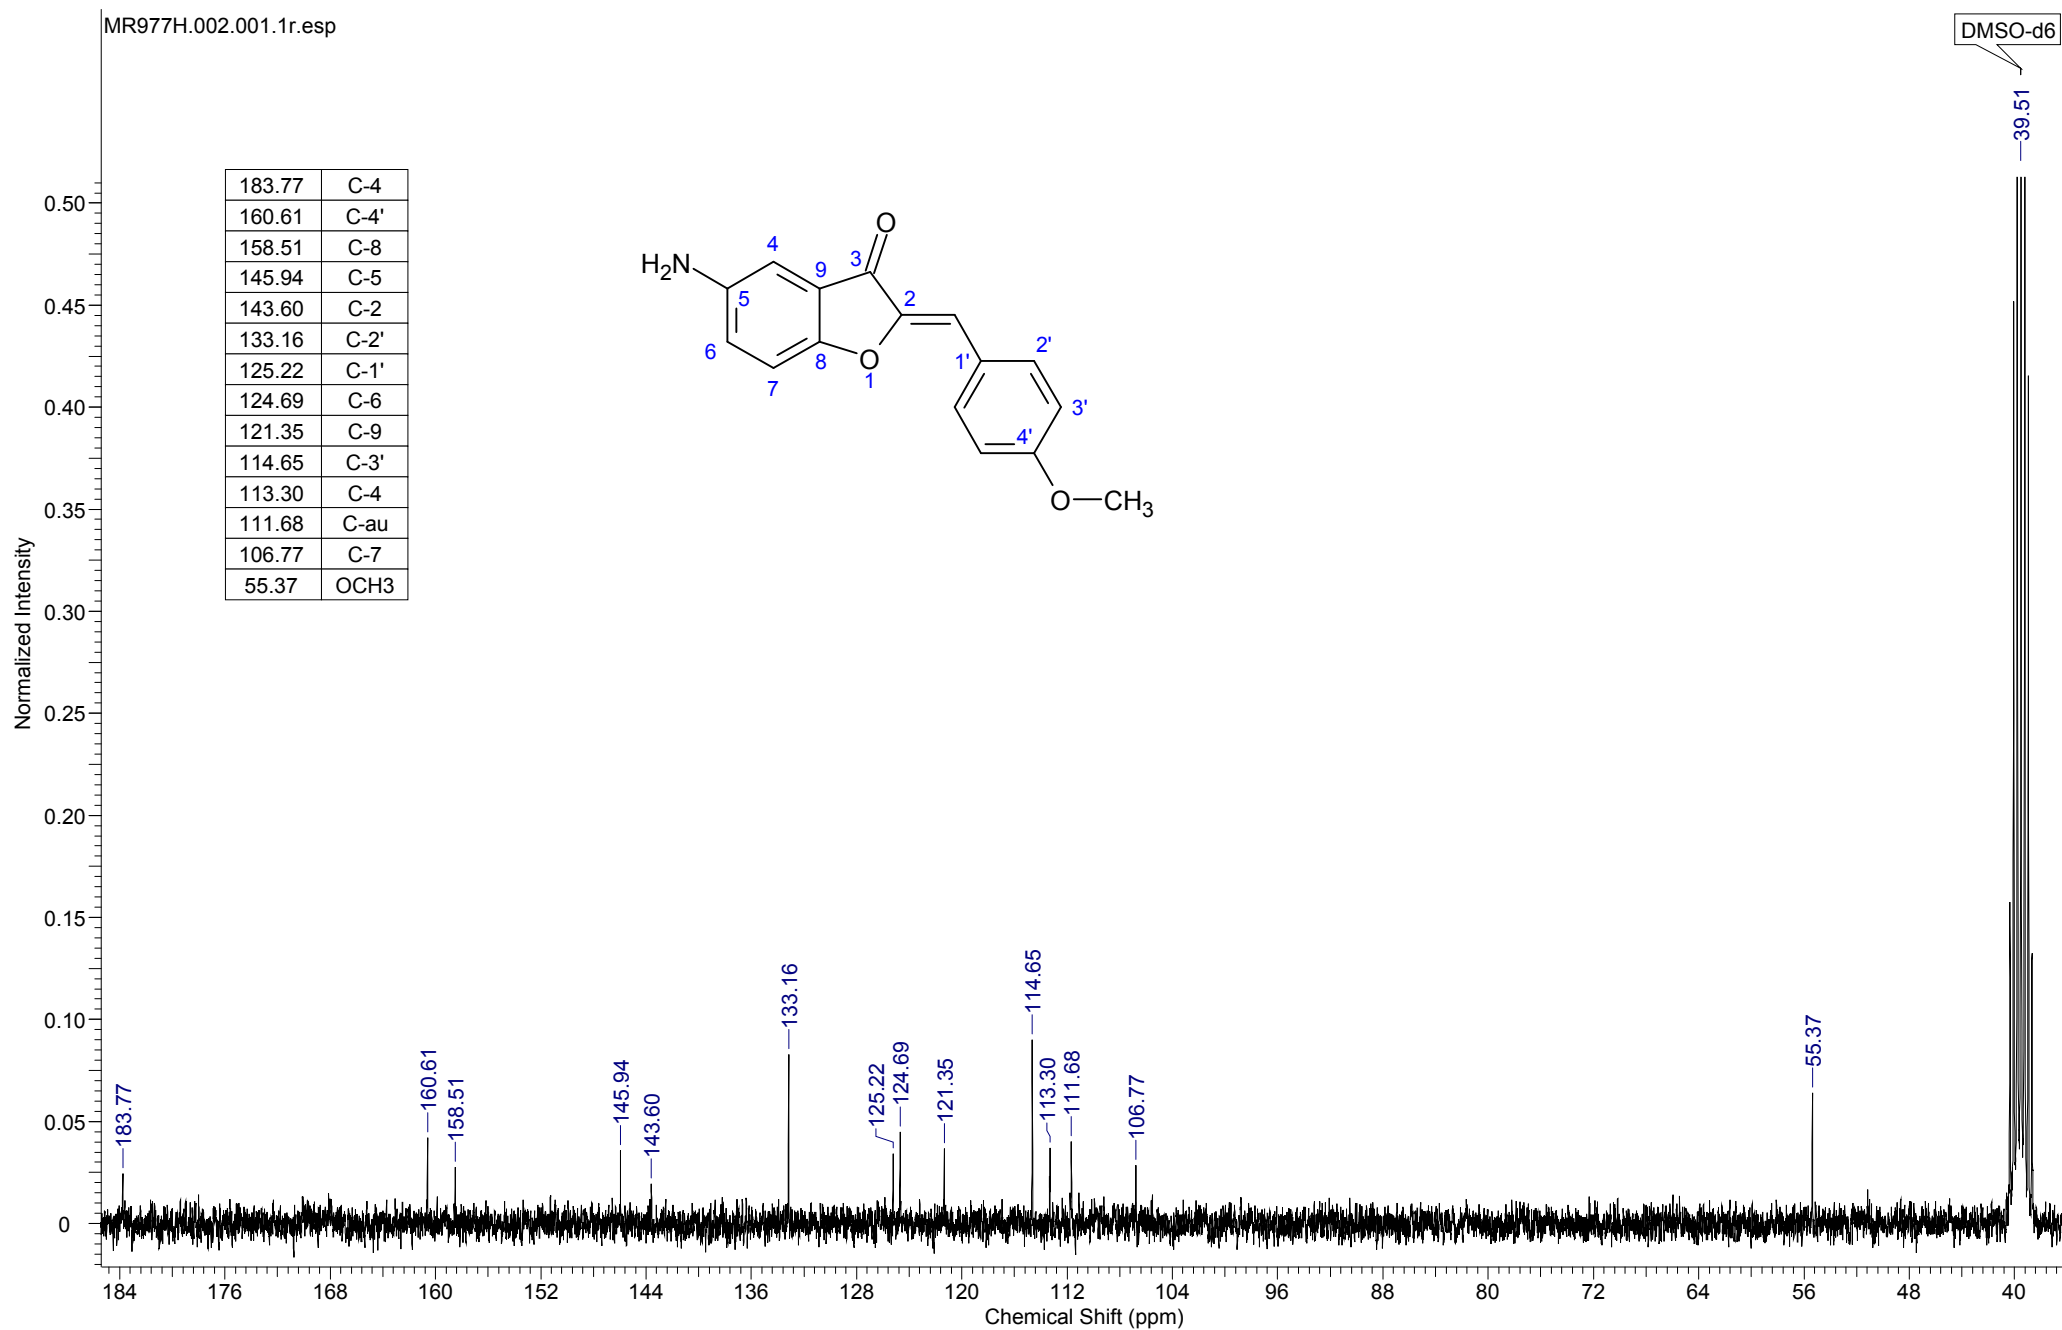

*N*-{(2*Z*)-2-[3-(benzyloxy)benzylidene]-3-oxo-2,3-dihydro-1-benzofuran-5-yl}acetamide

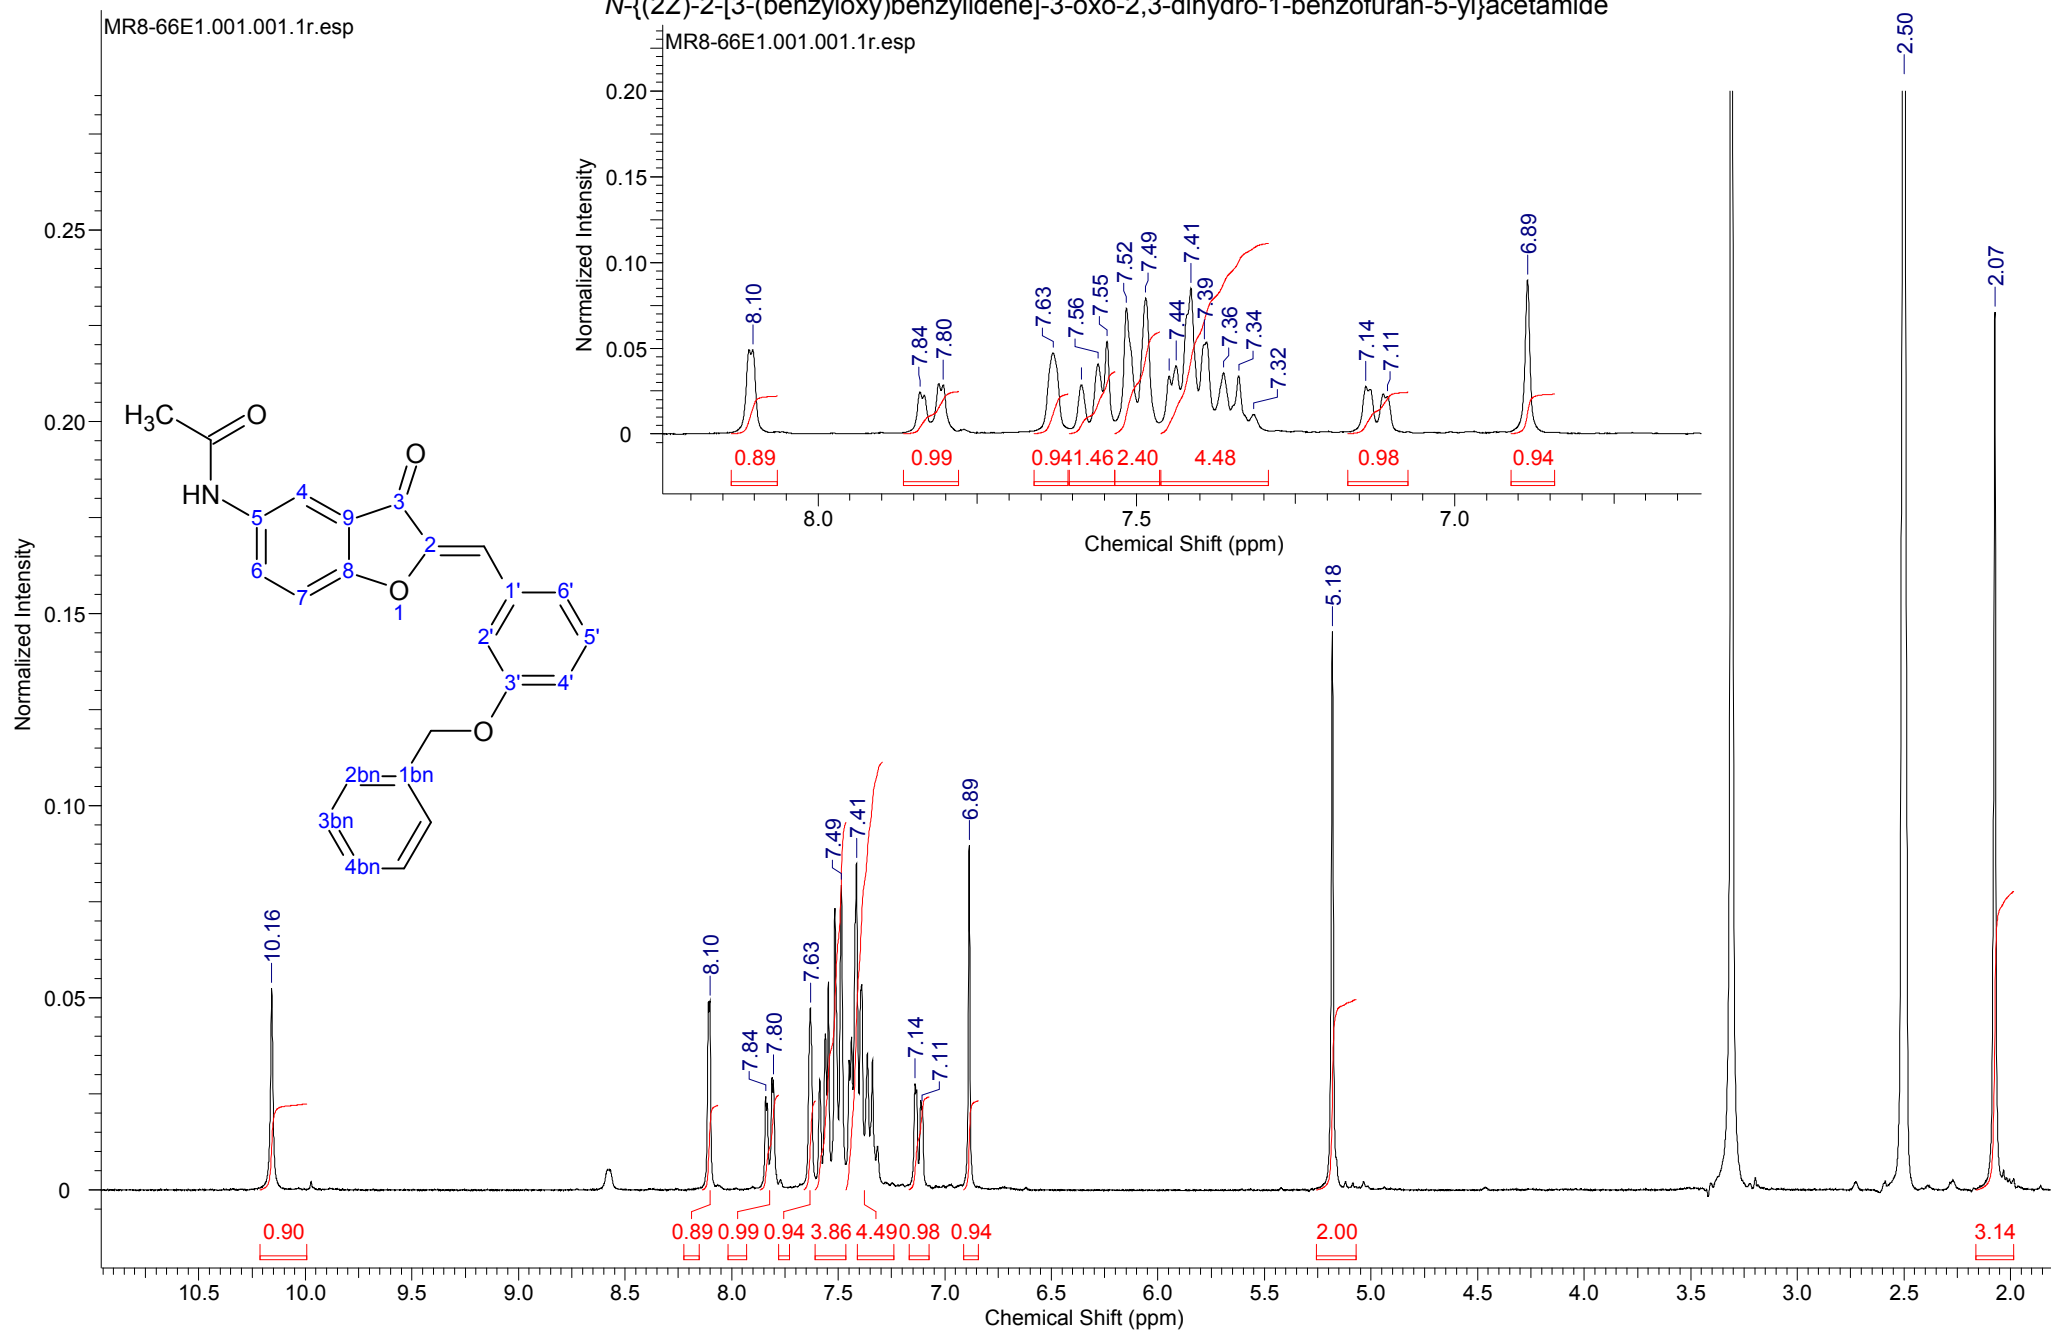

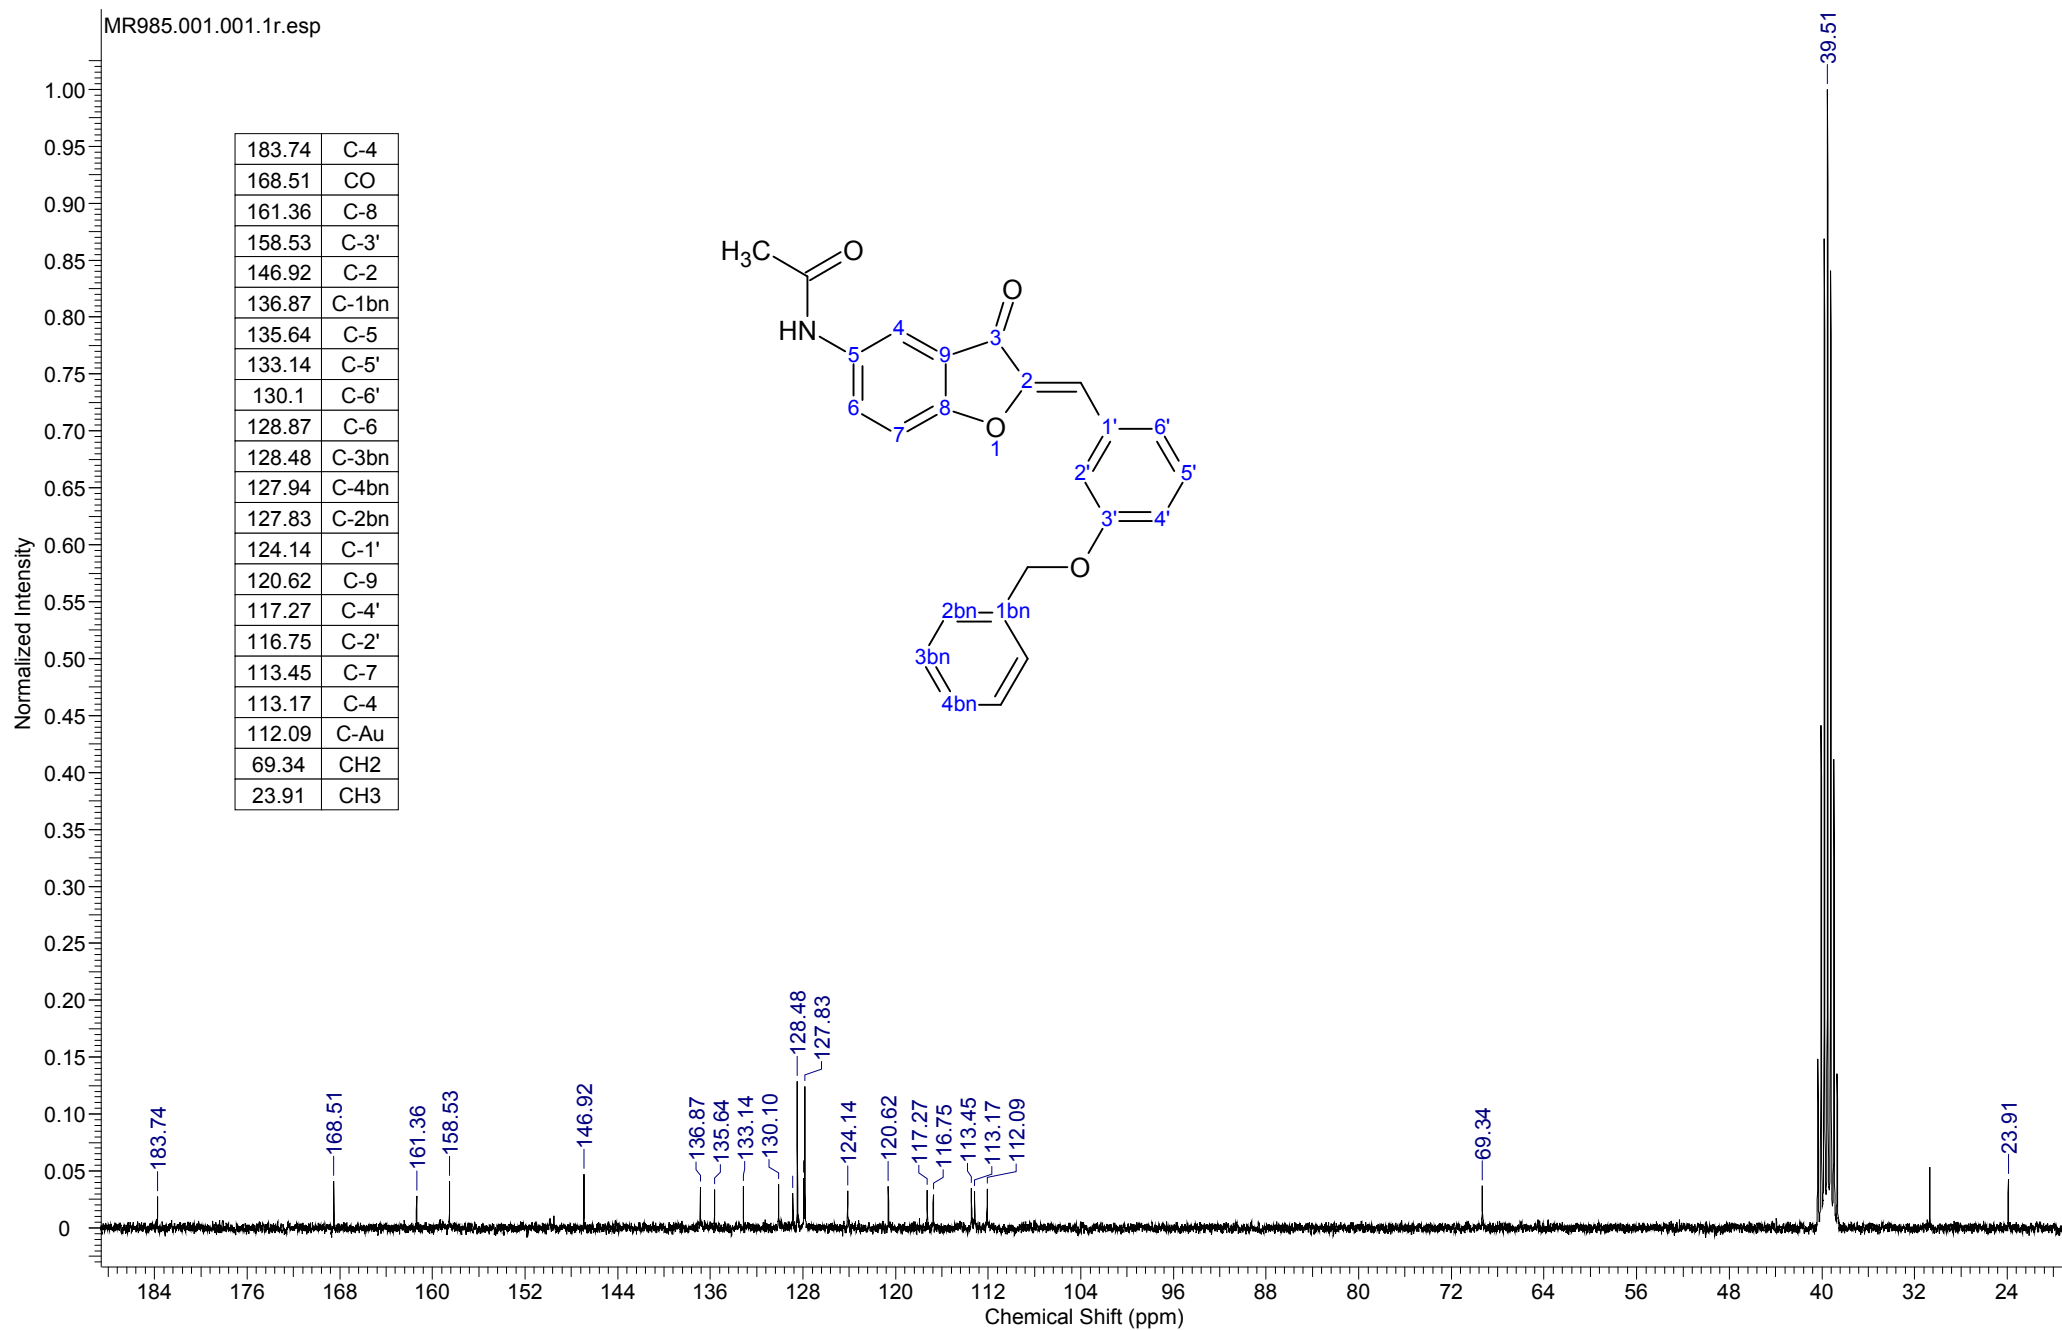

*N*-{[(2*Z*)-2-[4-(benzyloxy)benzylidene]-3-oxo-2,3-dihydro-1-benzofuran-5-yl]}acetamide

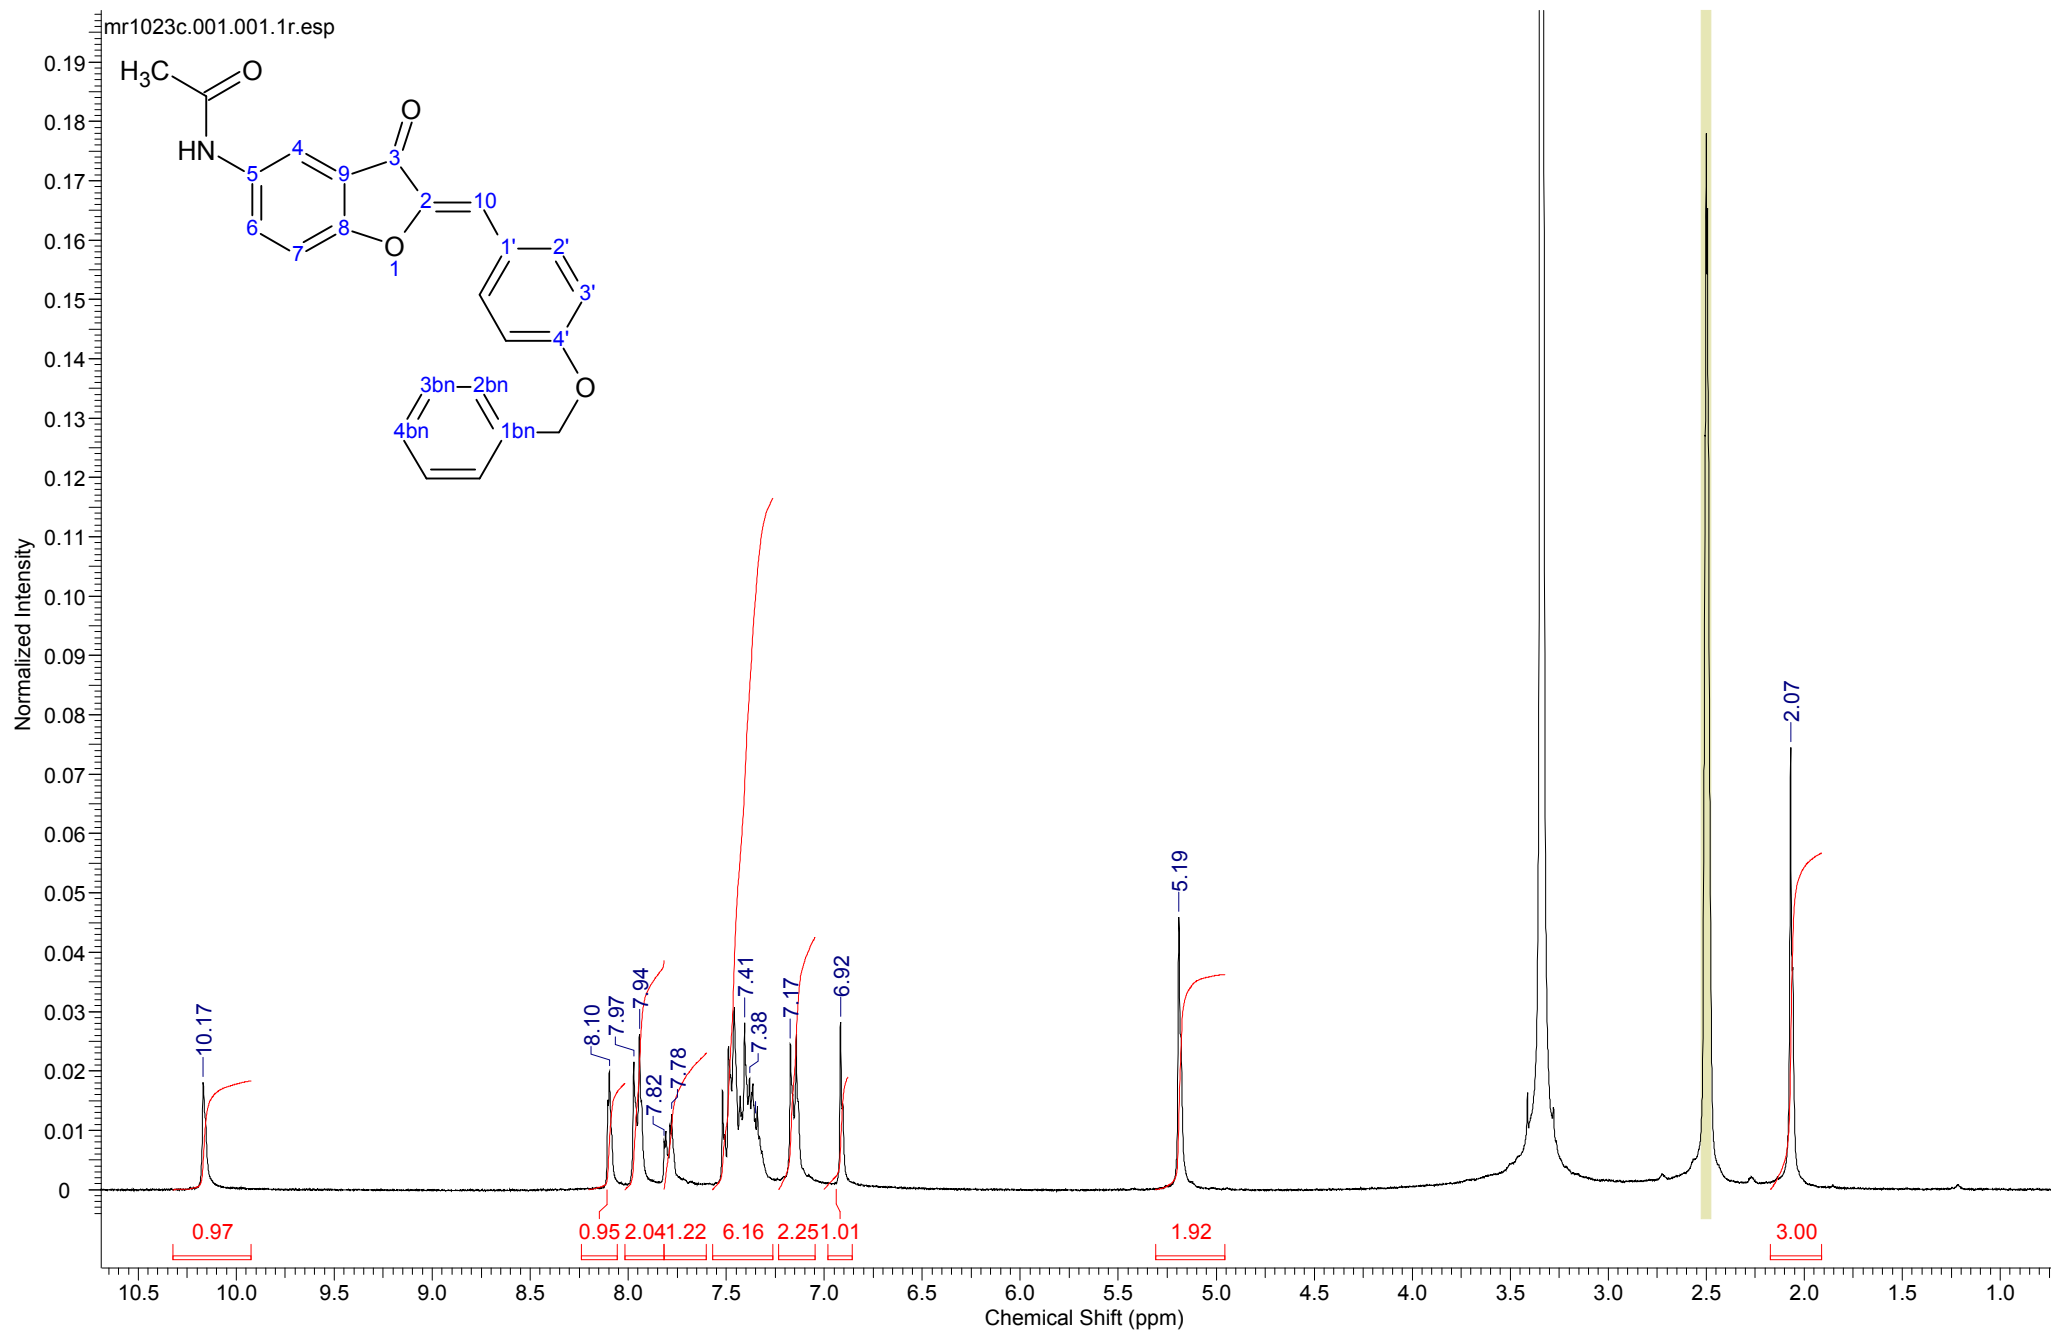



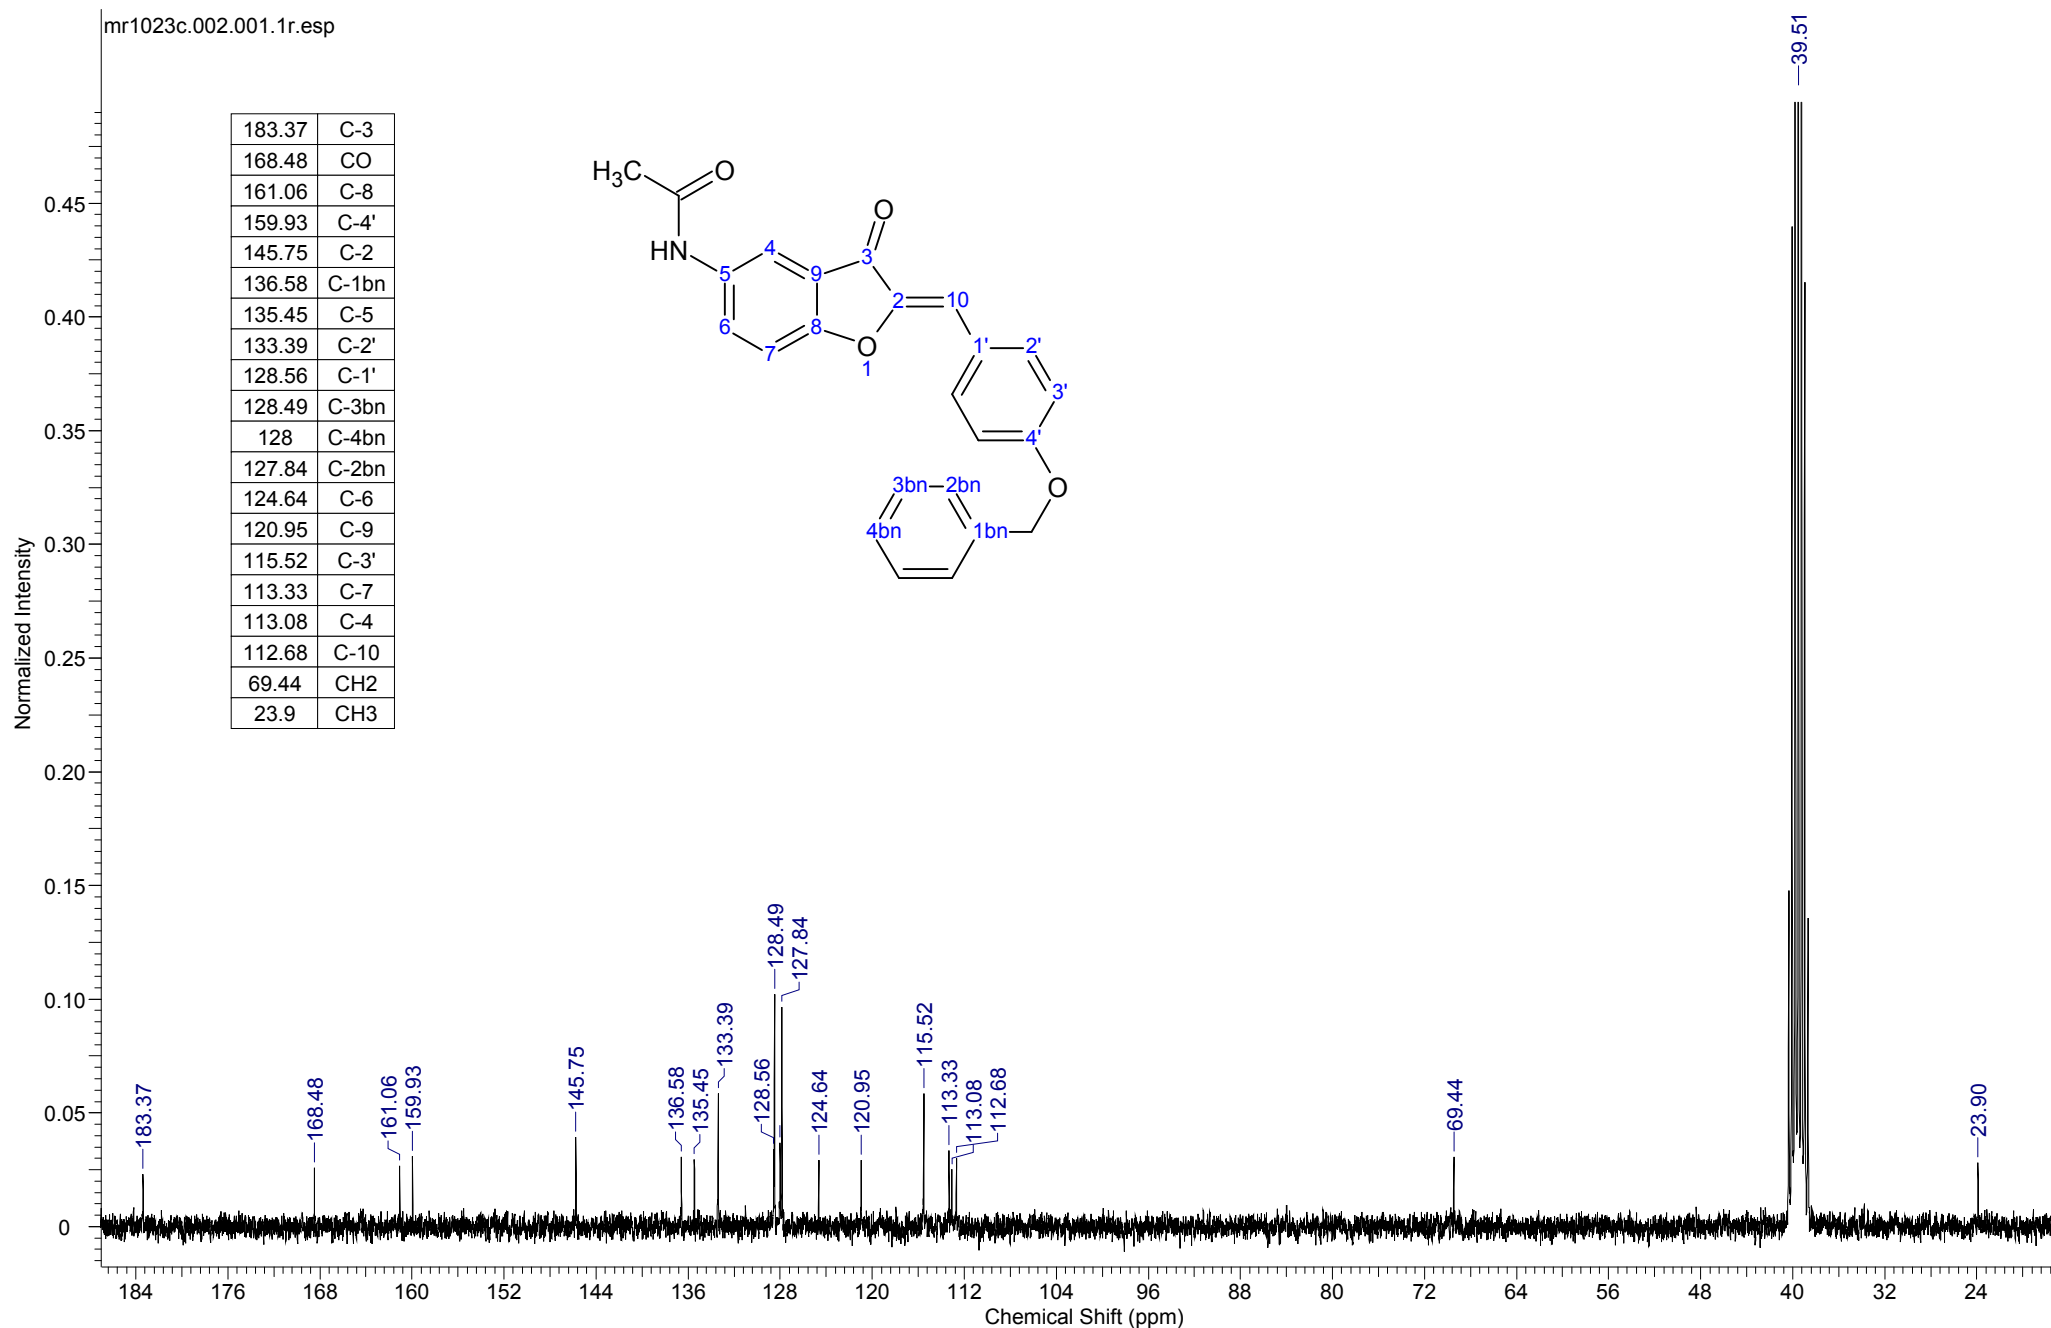

(2Z)-5-amino-2-[3-(benzyloxy)benzylidene]-1-benzofuran-3(2H)-one

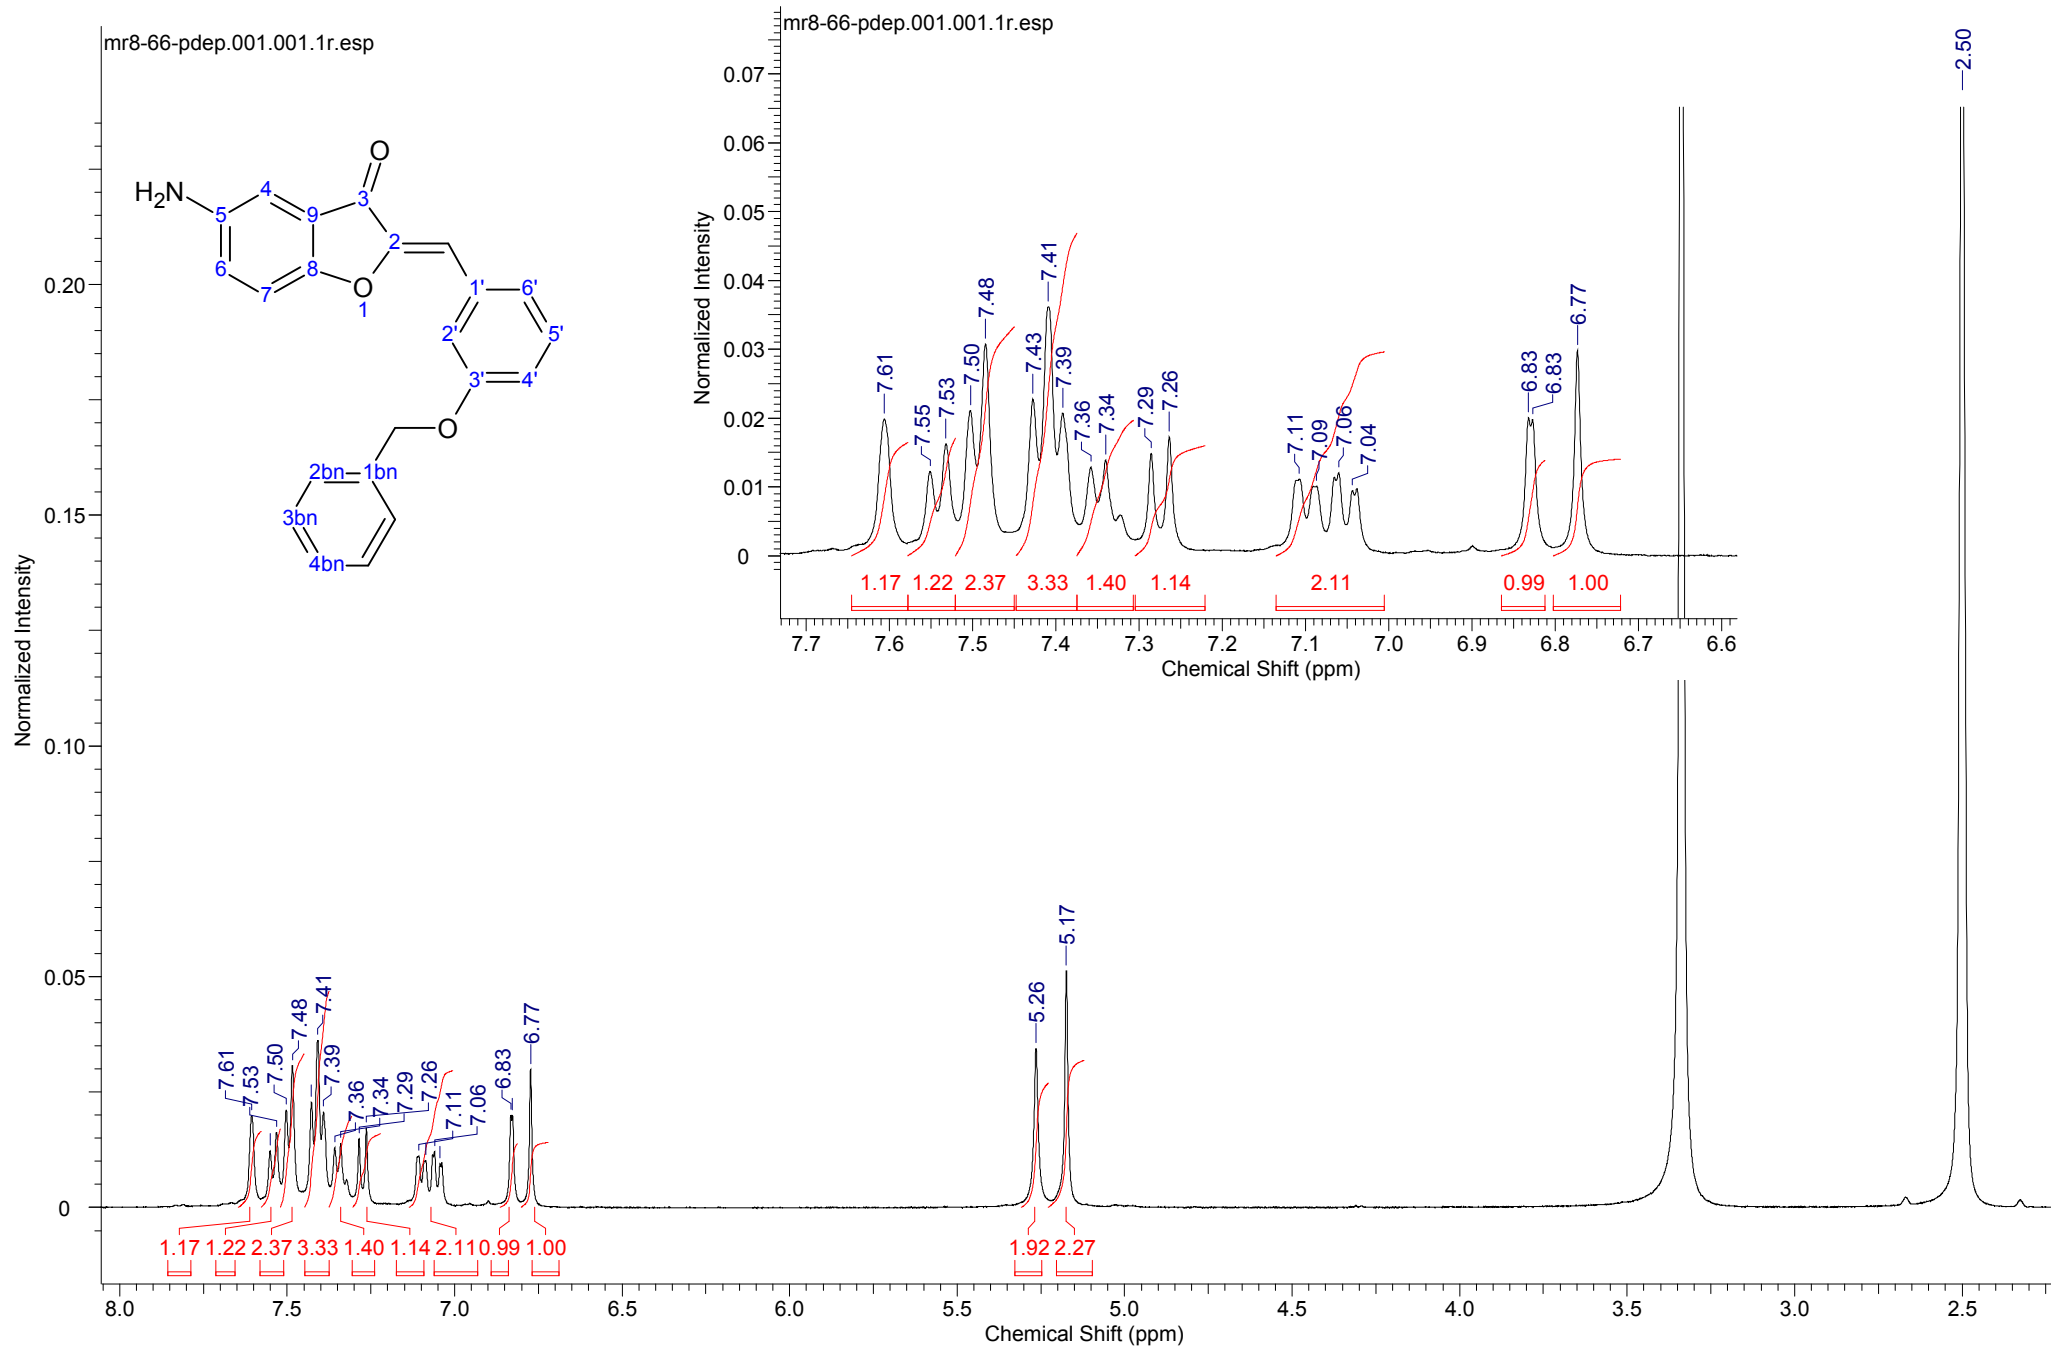

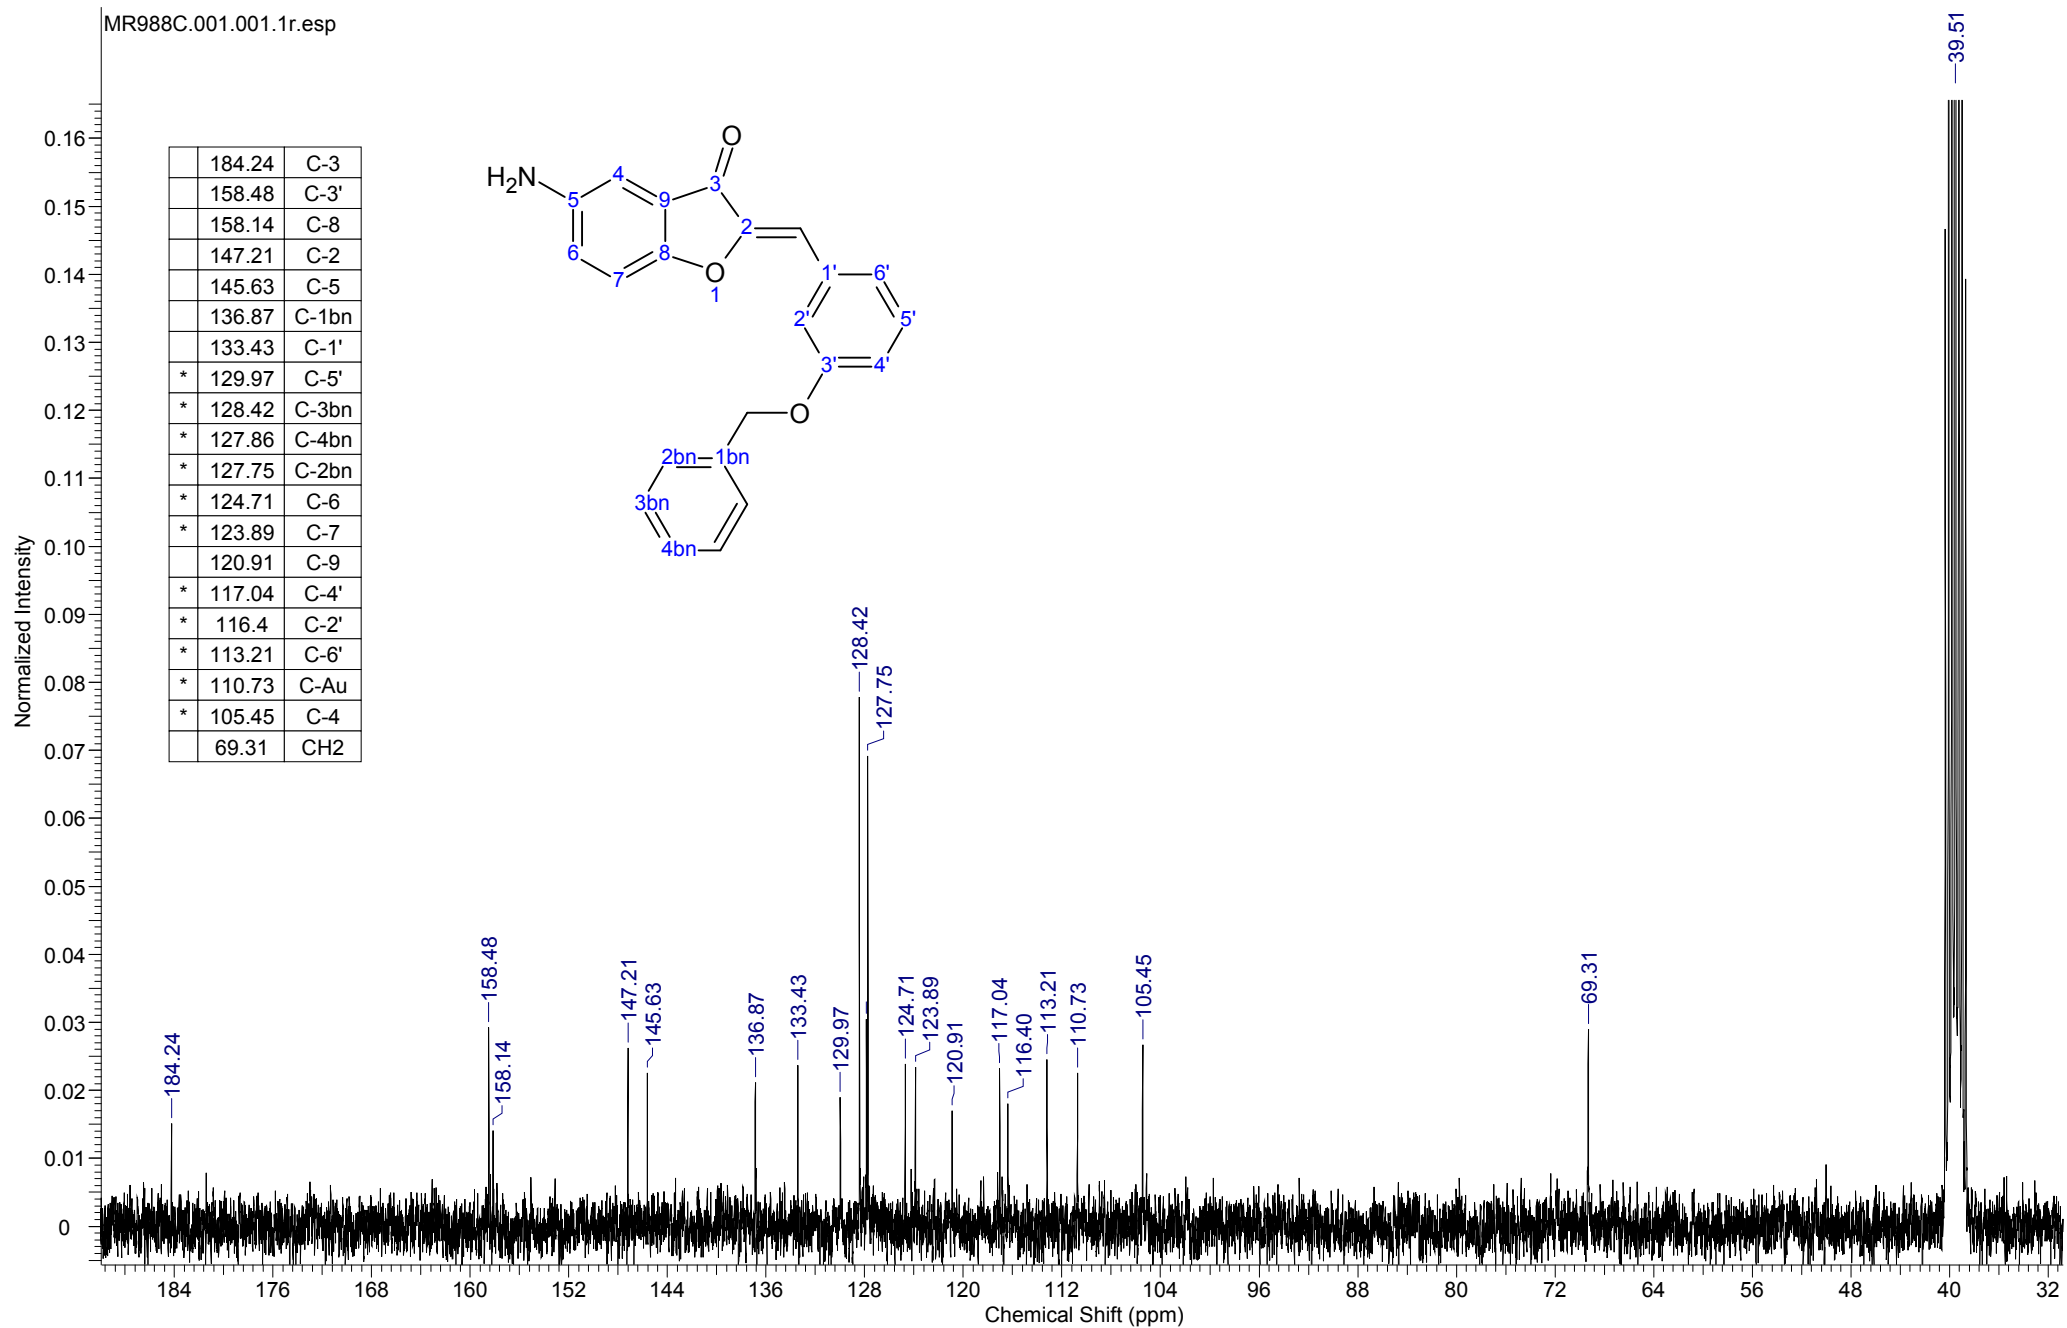

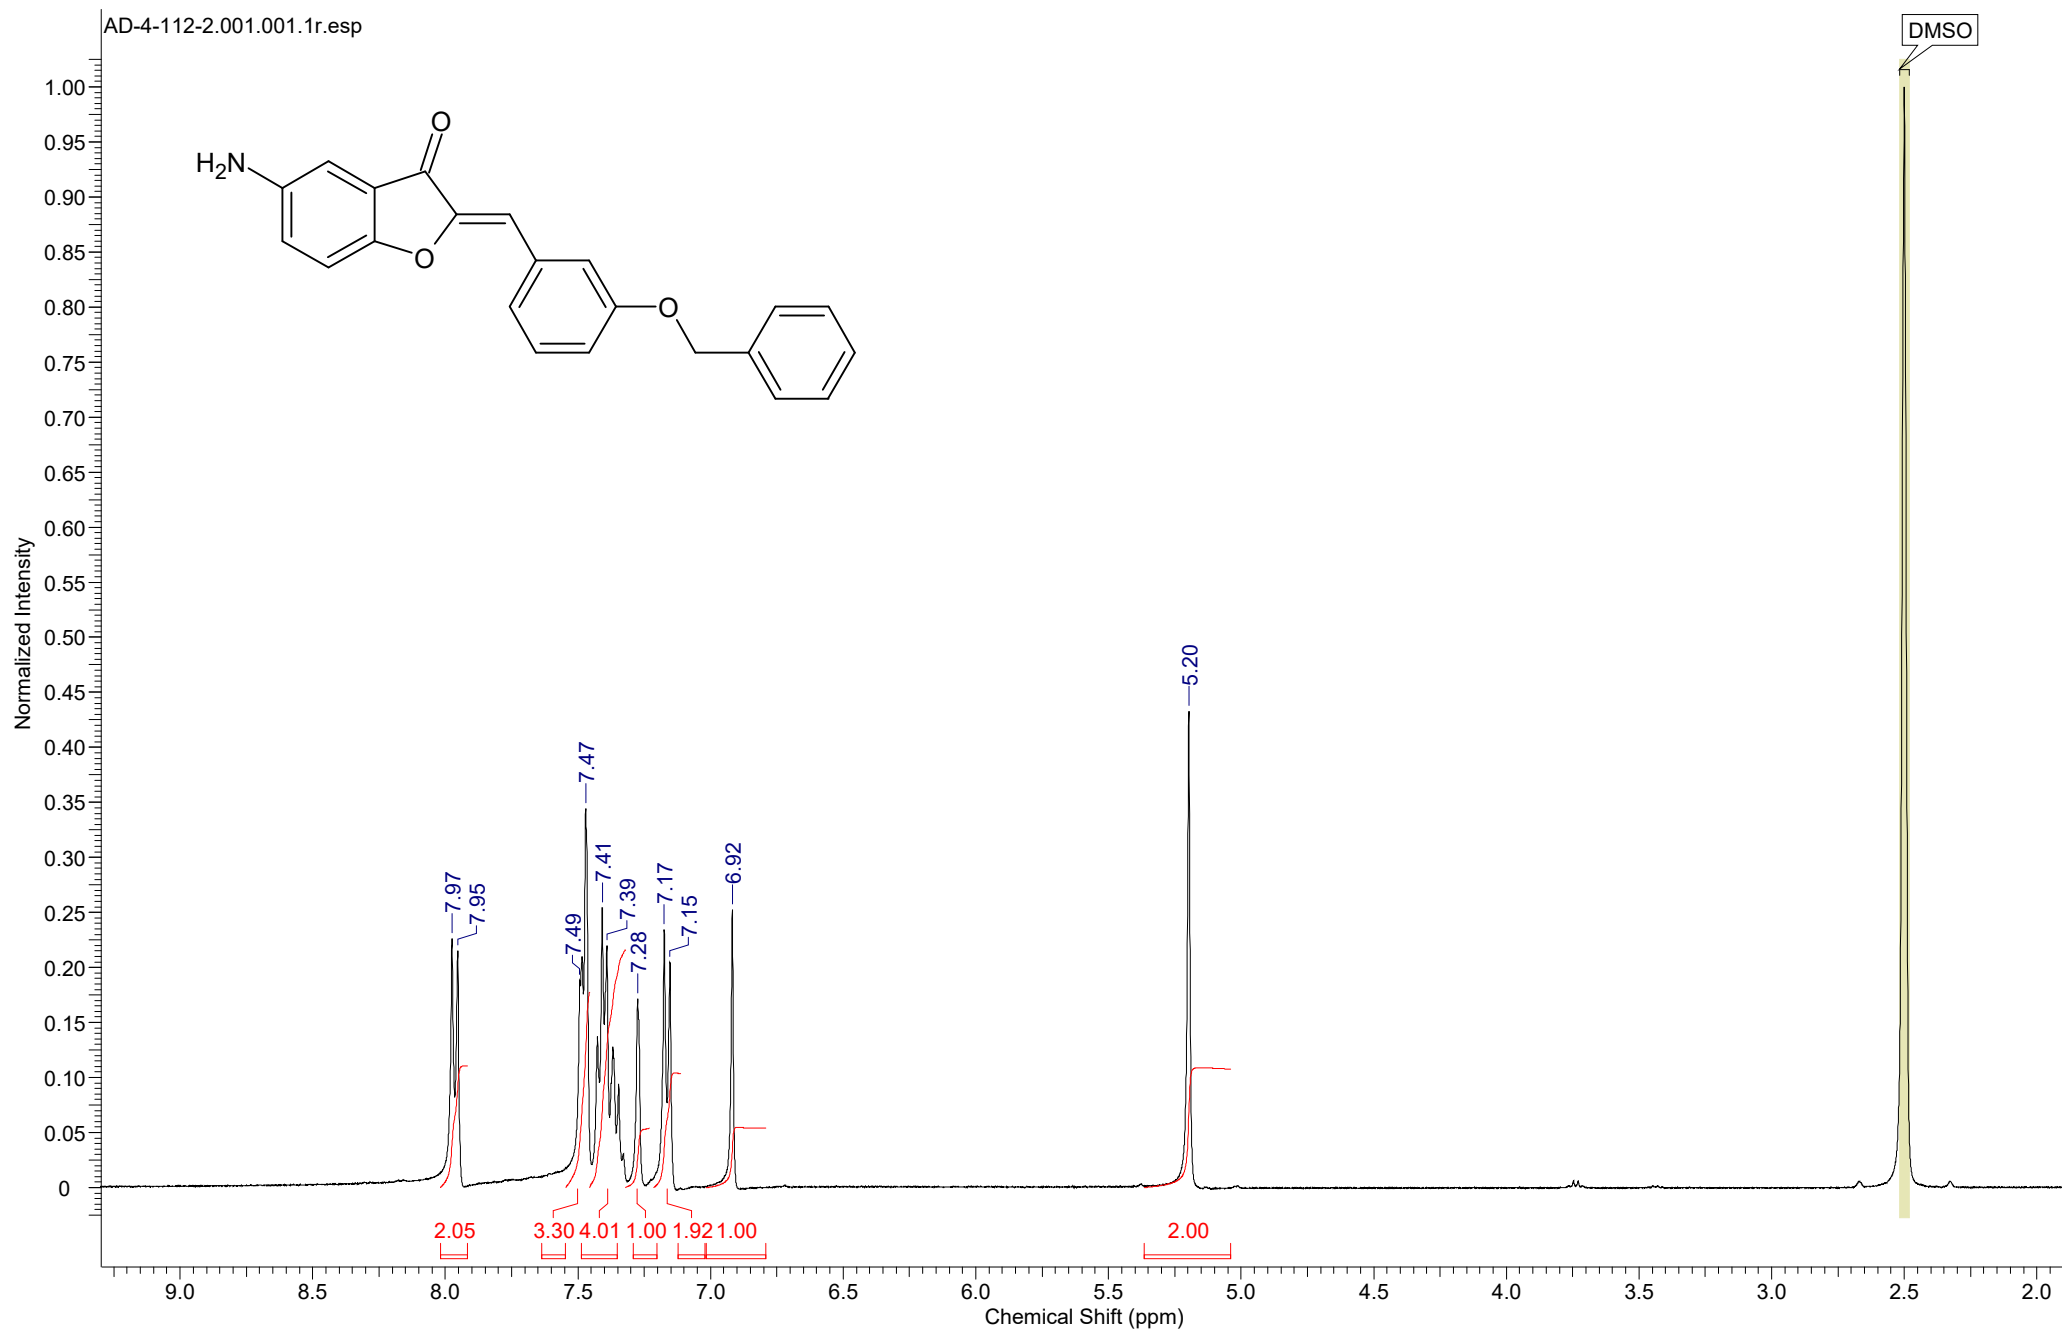

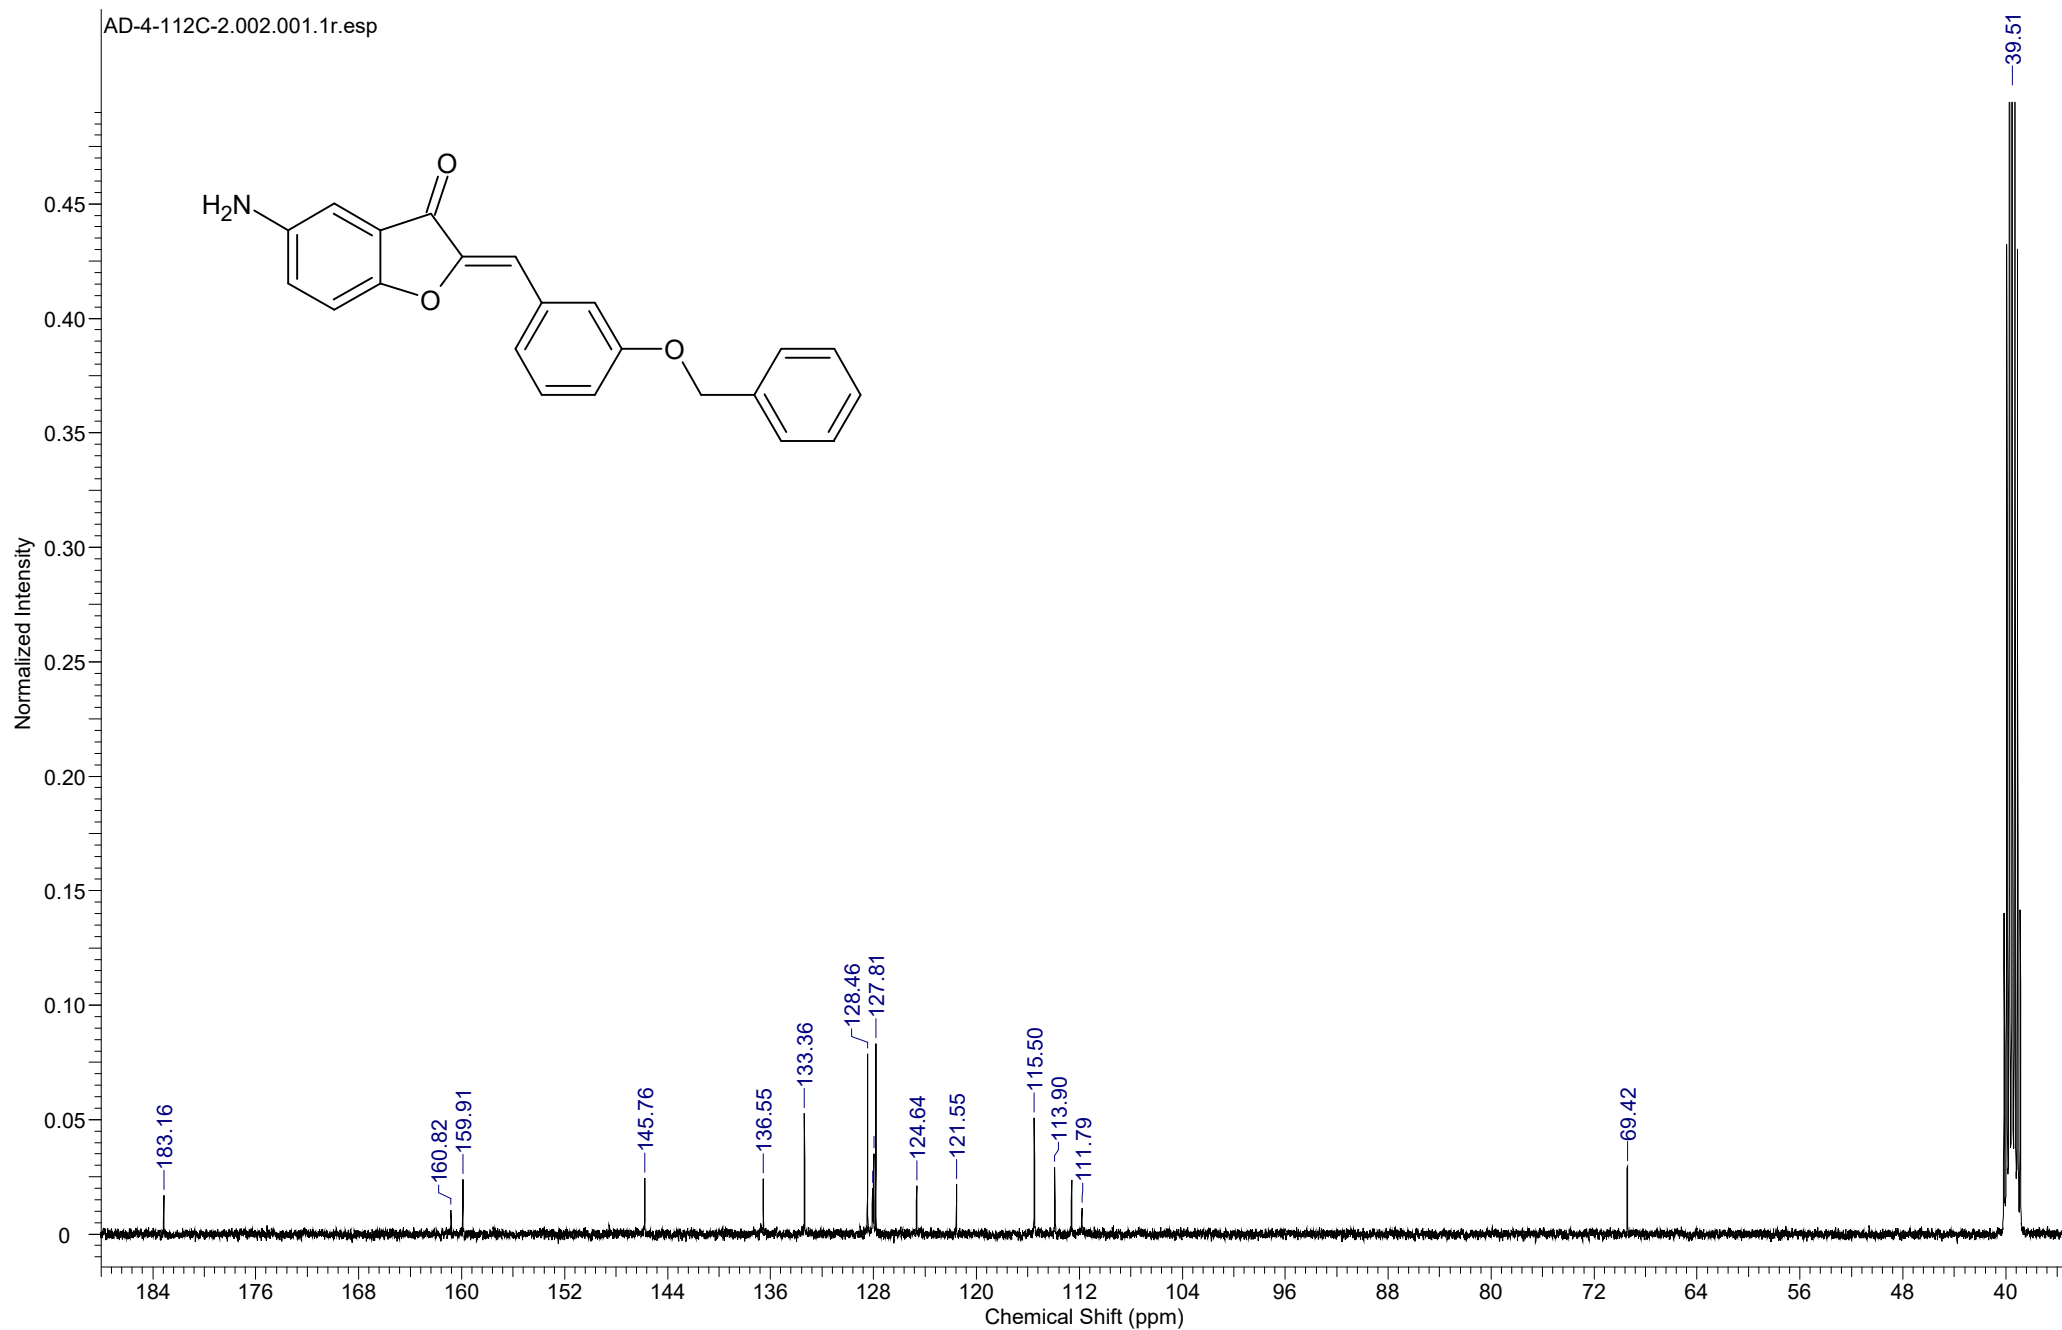

MR8-64-P23OP.001.001.1r.esp

*N*-[(2*Z*)-3-oxo-2-(3-phenoxybenzylidene)-2,3-dihydro-1-benzofuran-5-yl]acetamide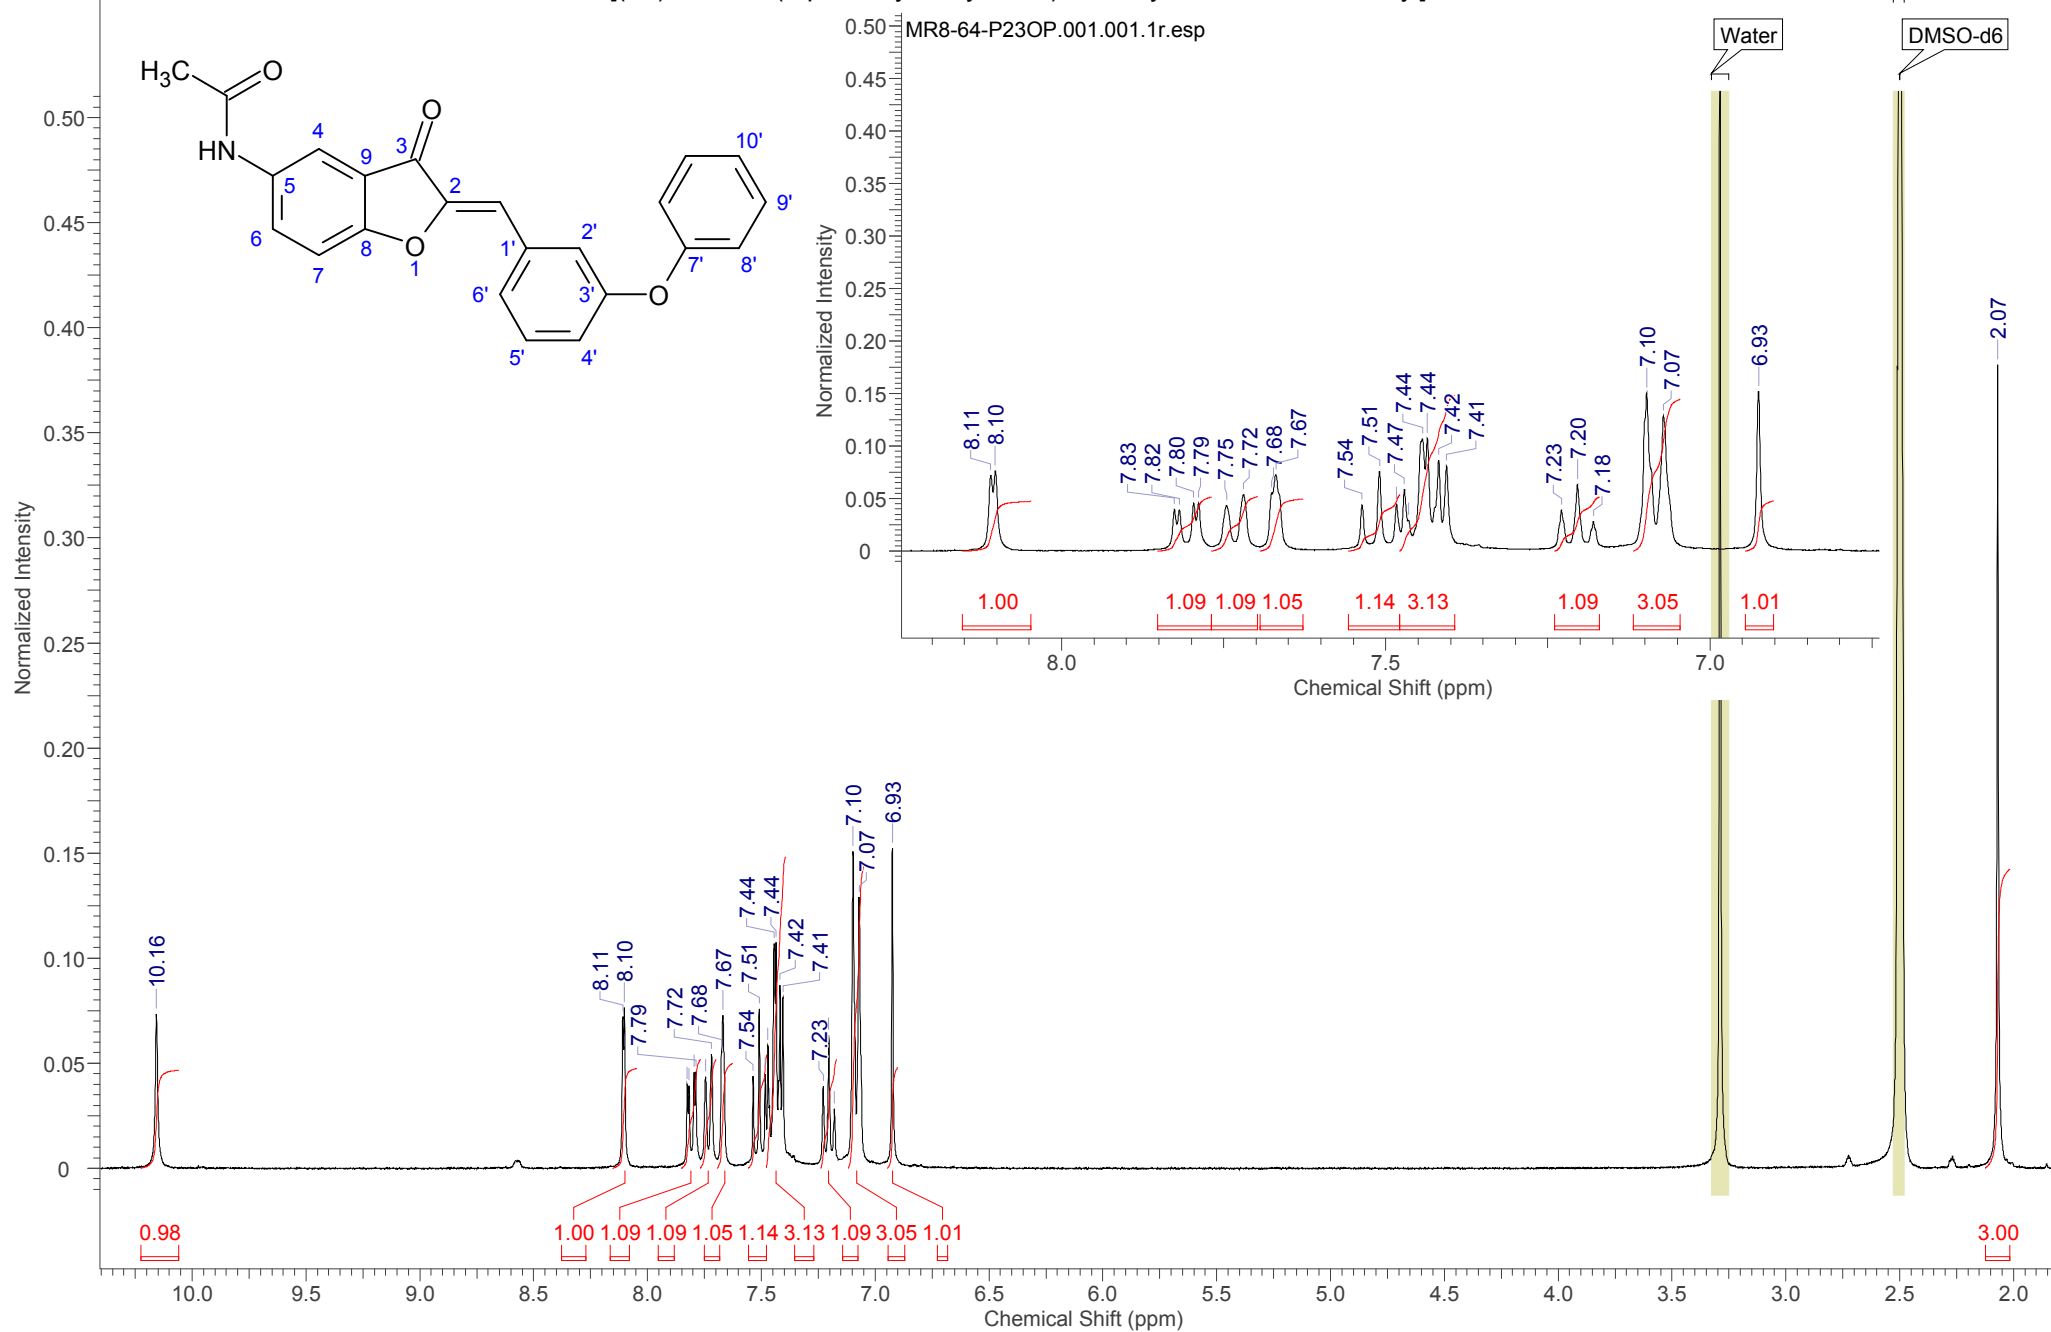

MR757C.001.001.1r.esp

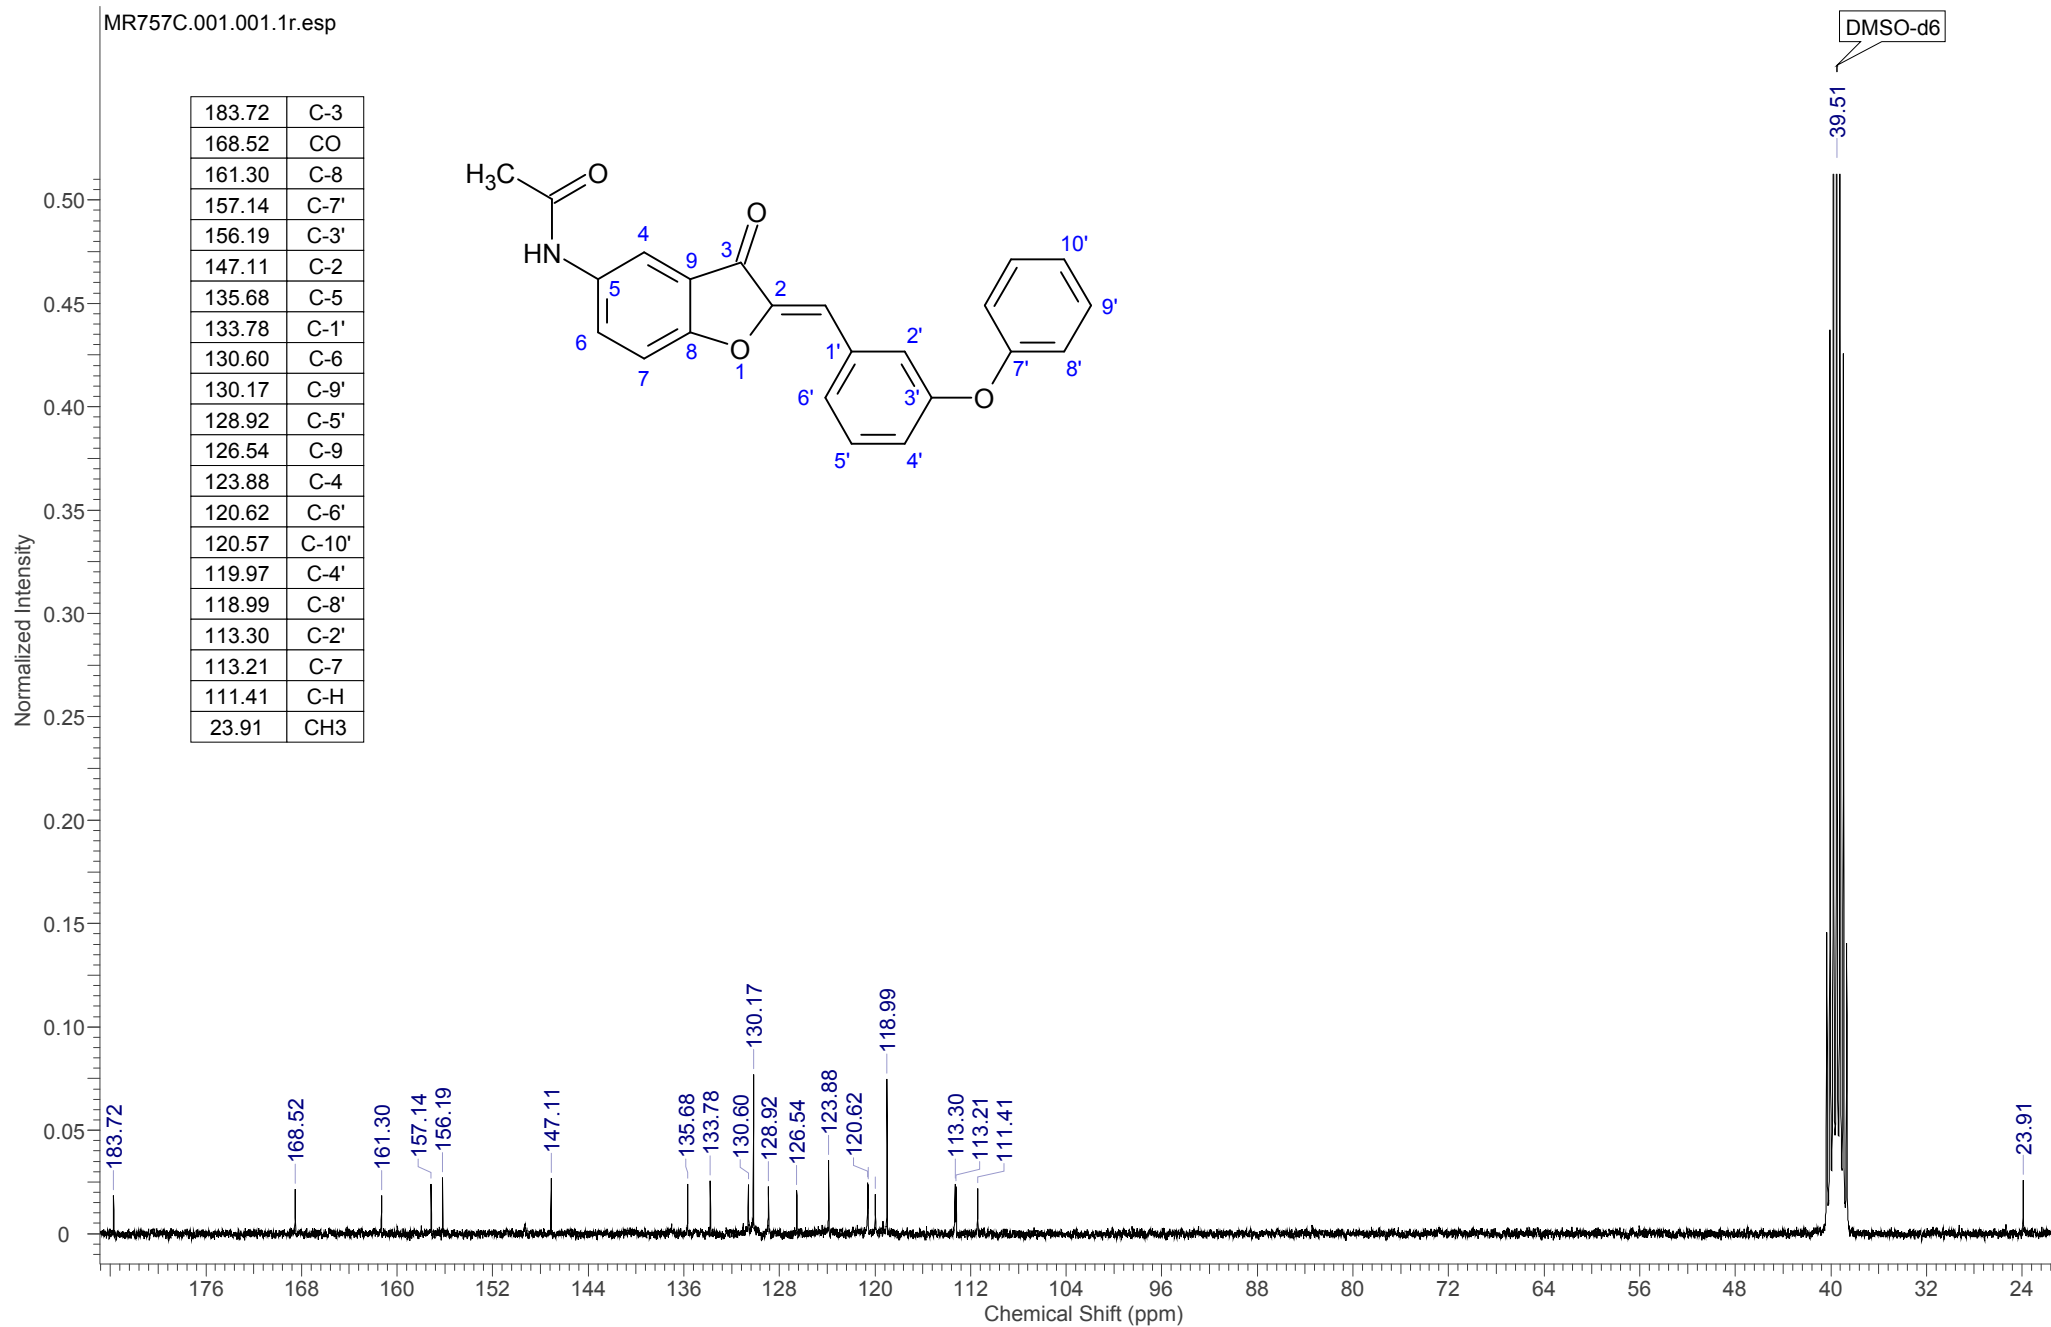

*N*-[(2*Z*)-3-oxo-2-(4-phenoxybenzylidene)-2,3-dihydro-1-benzofuran-5-yl]acetamide

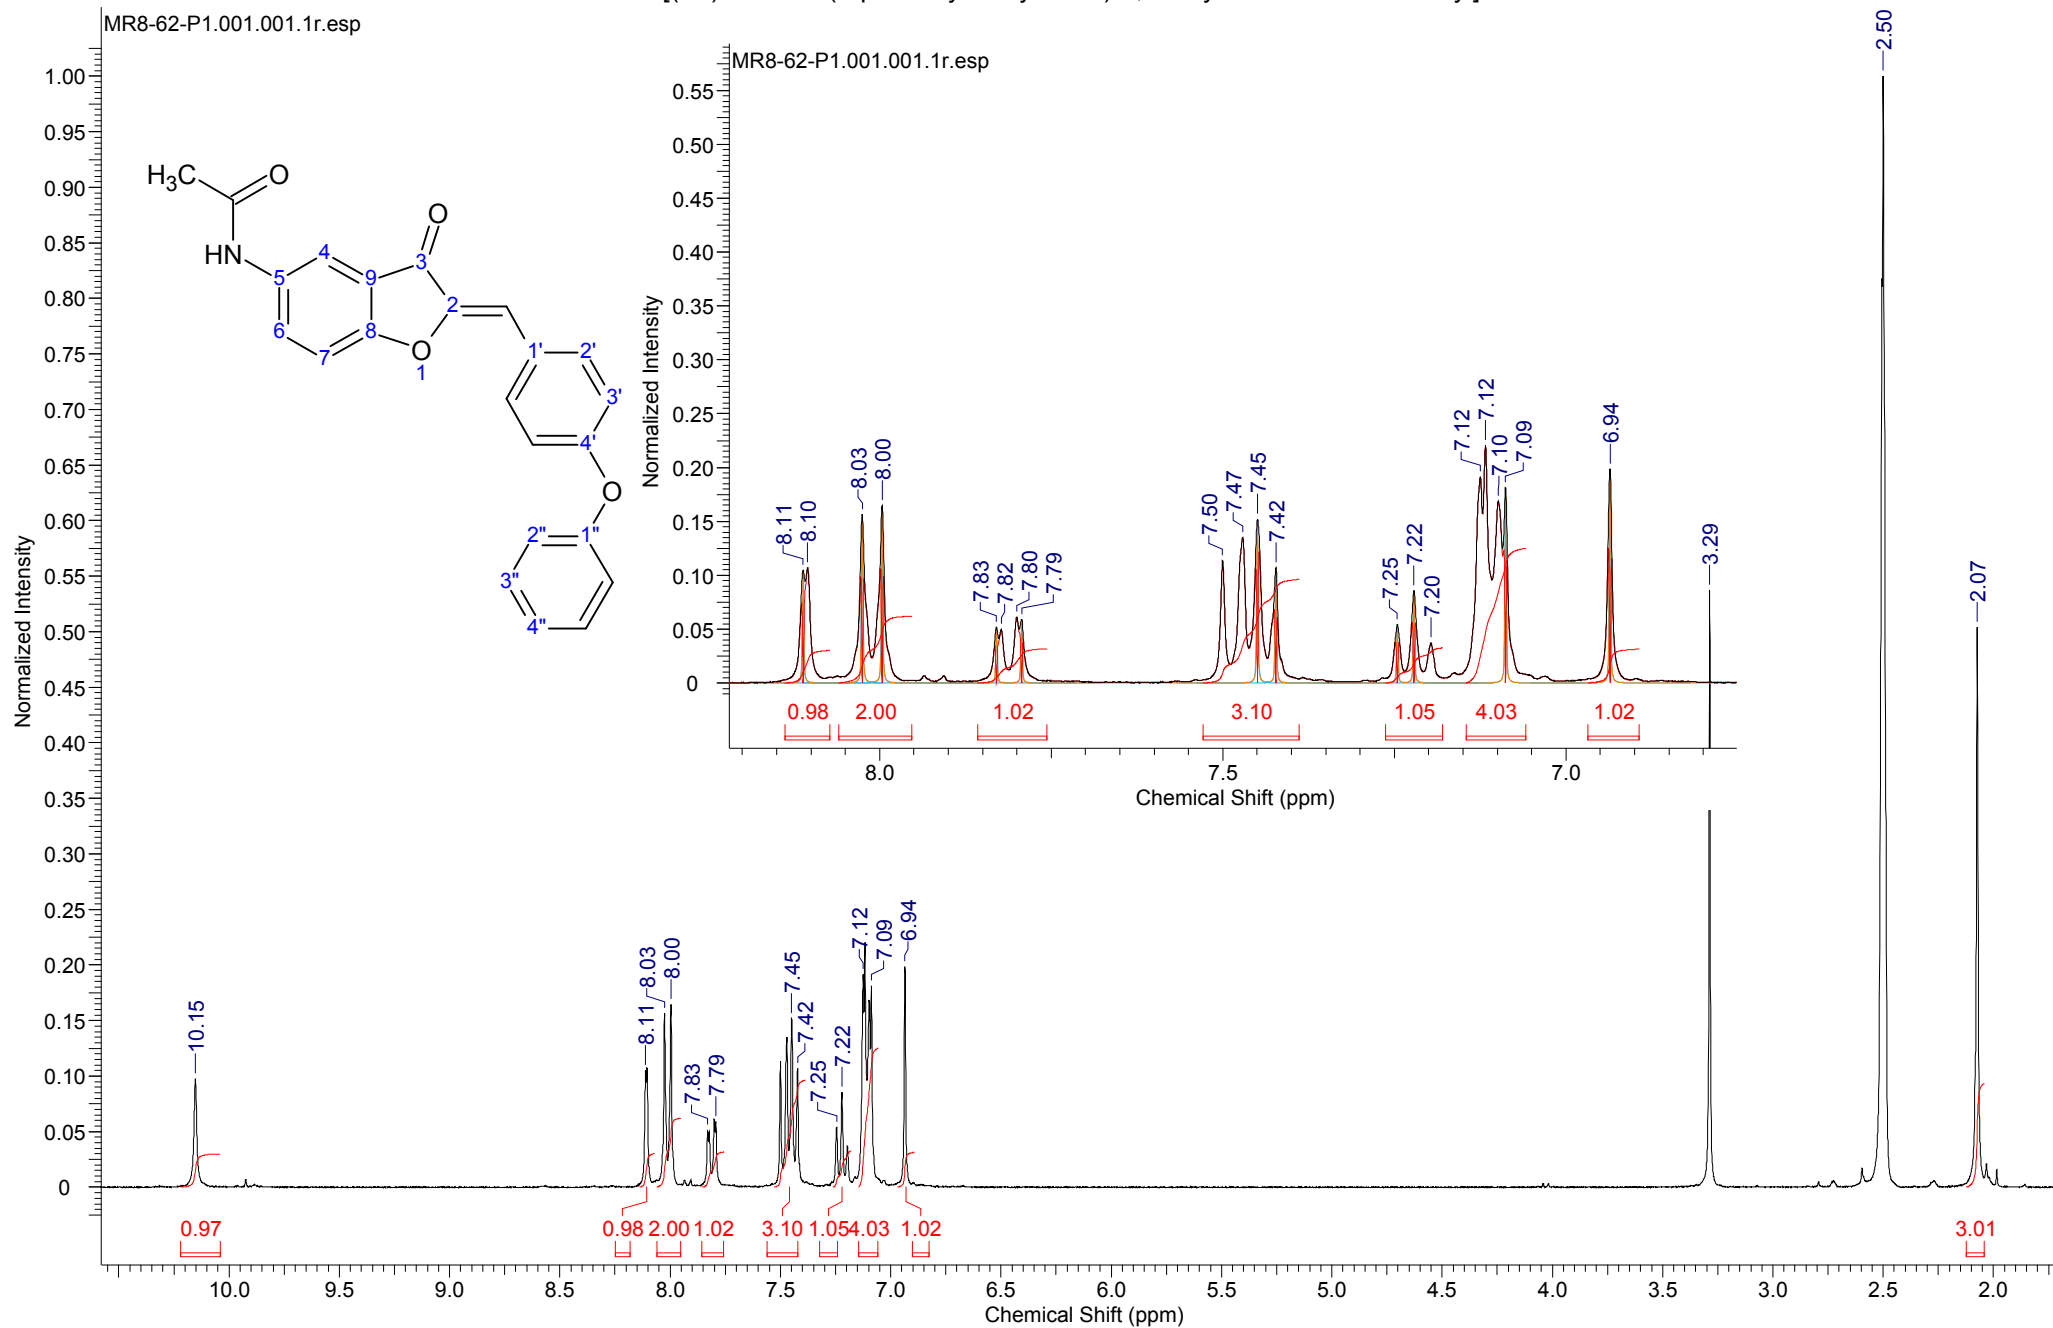



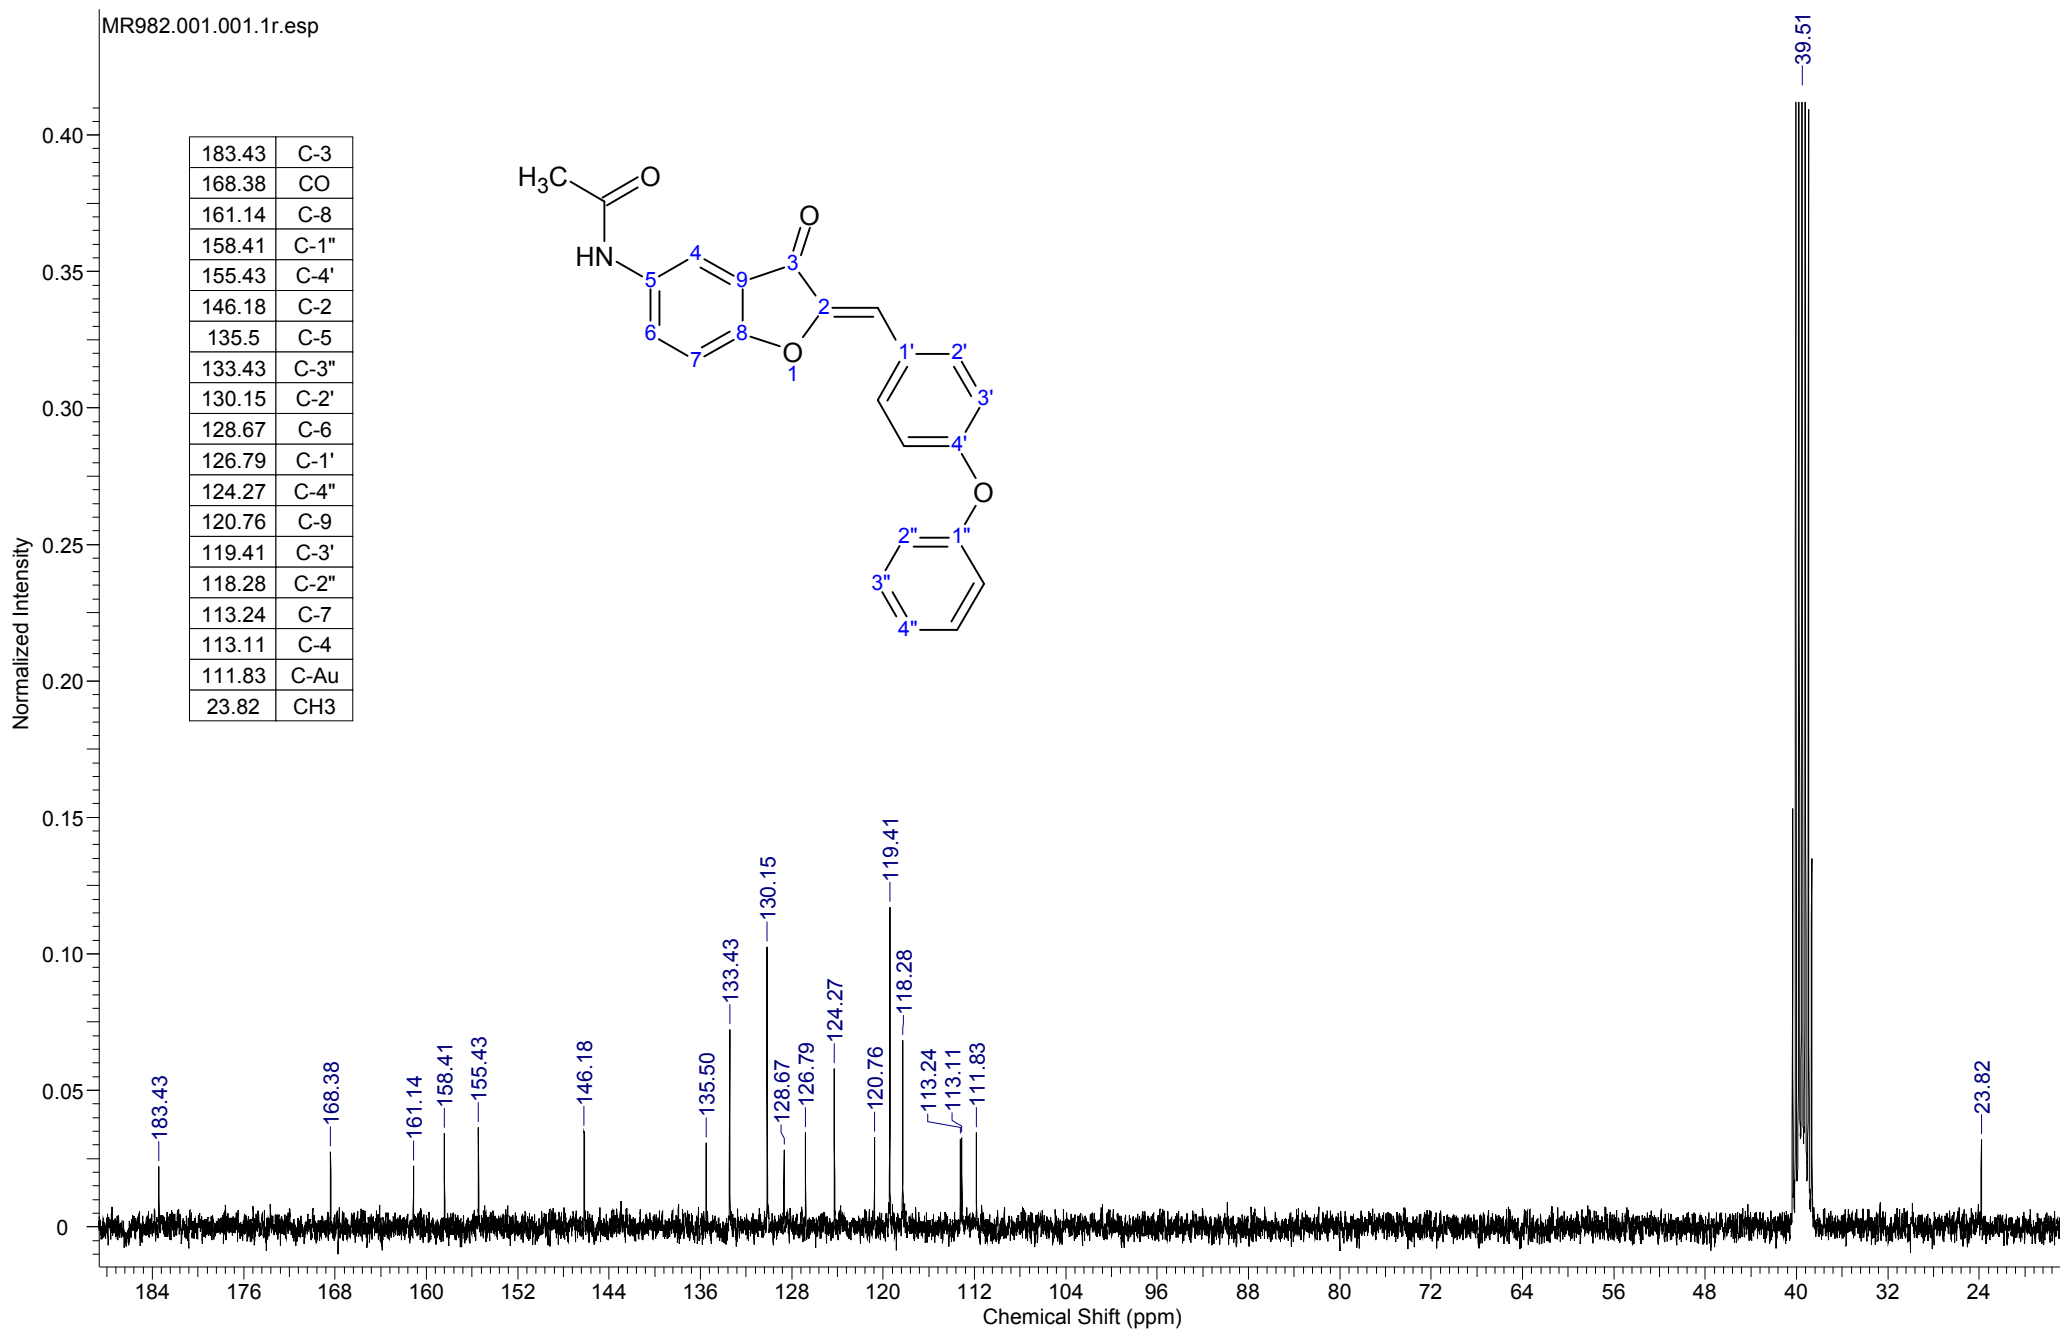

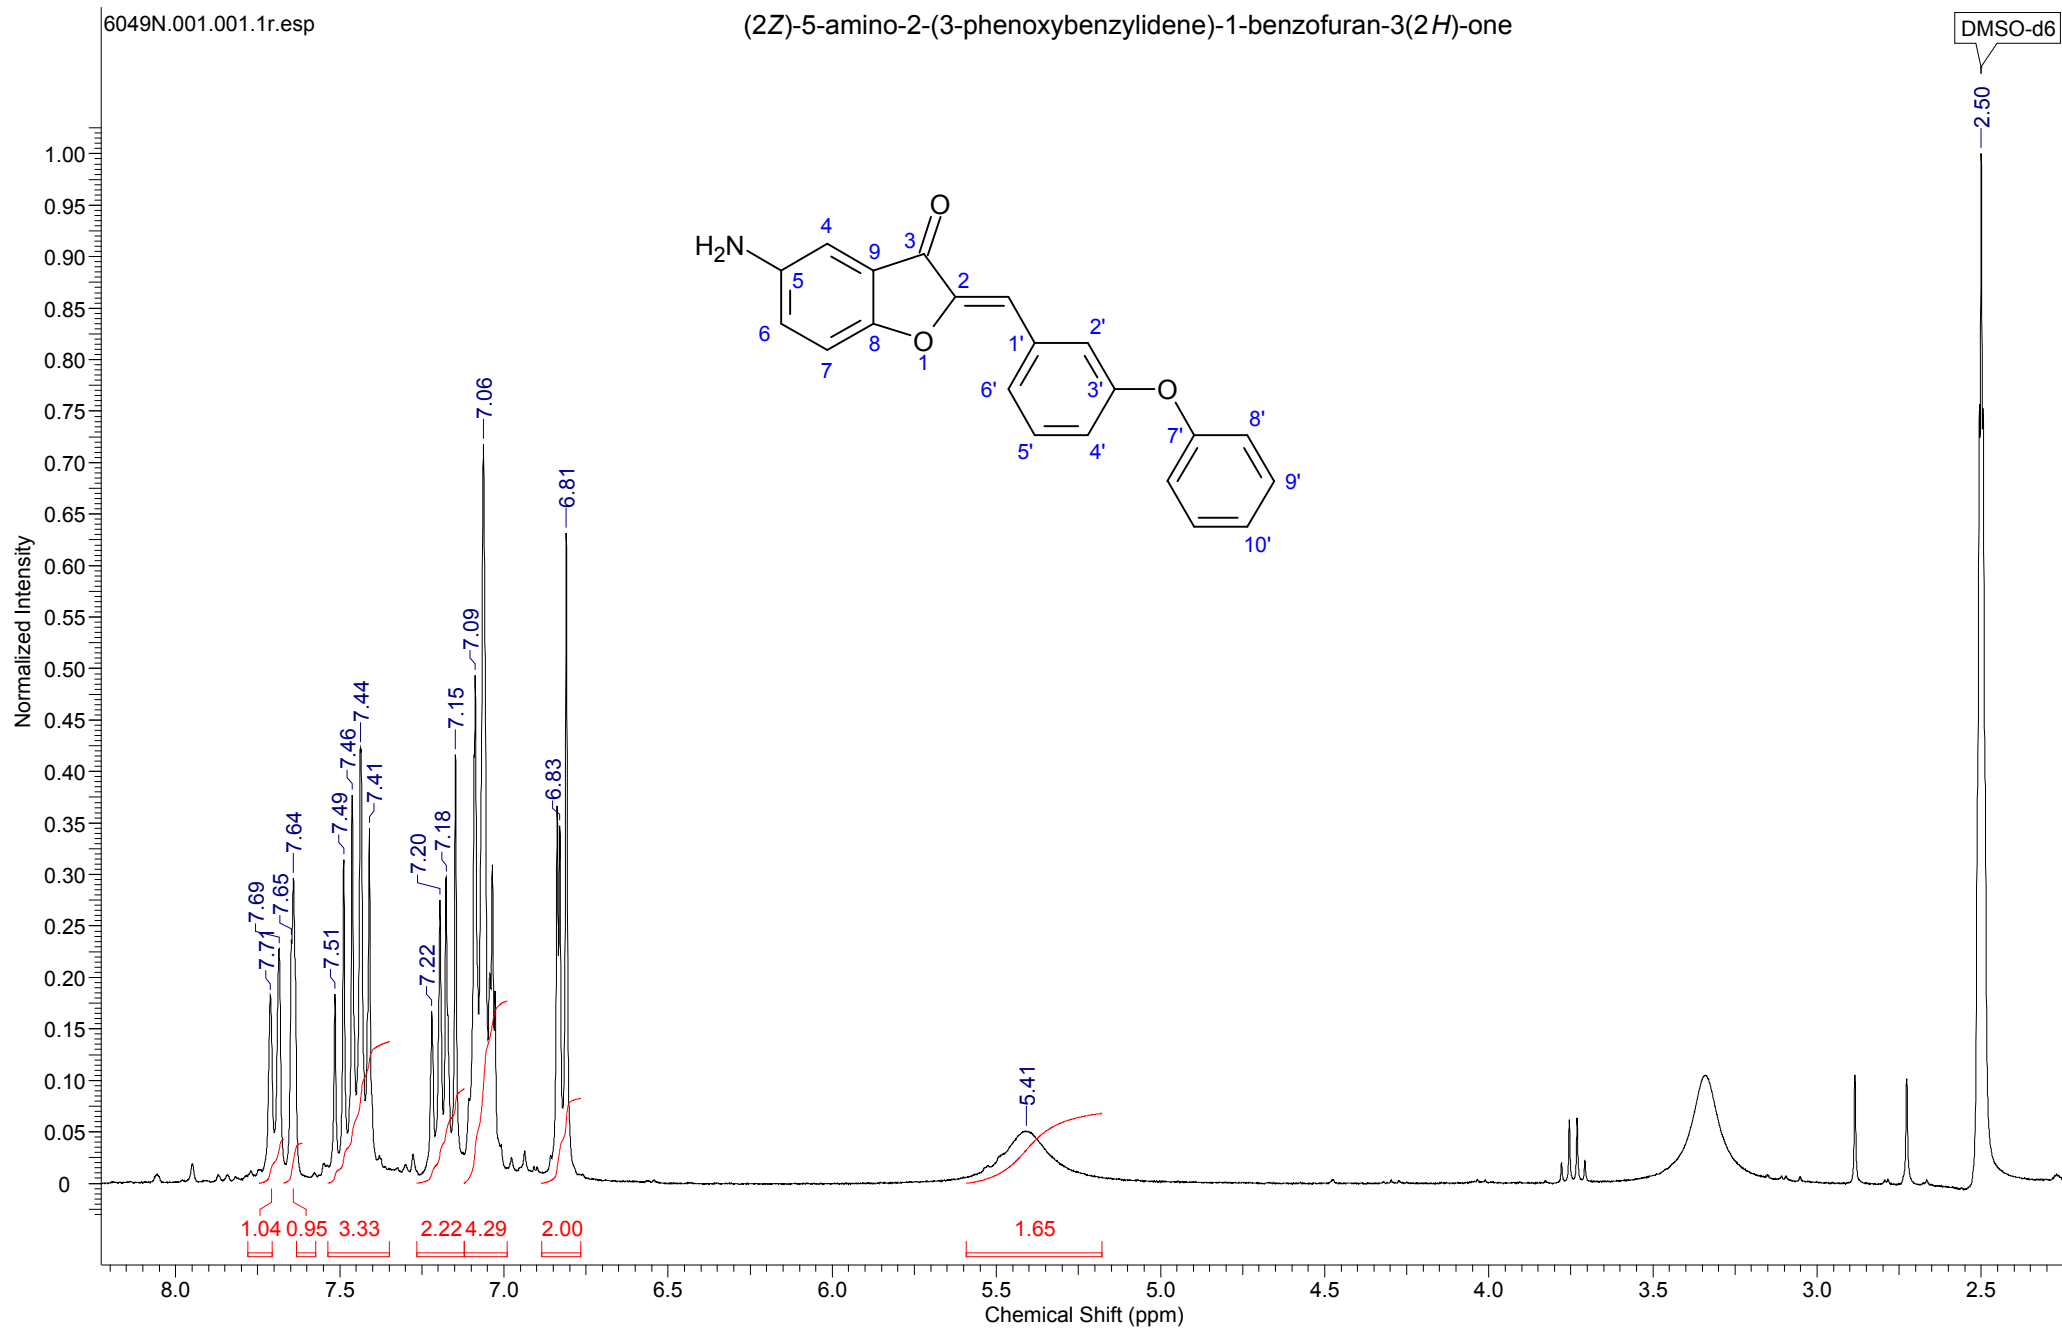

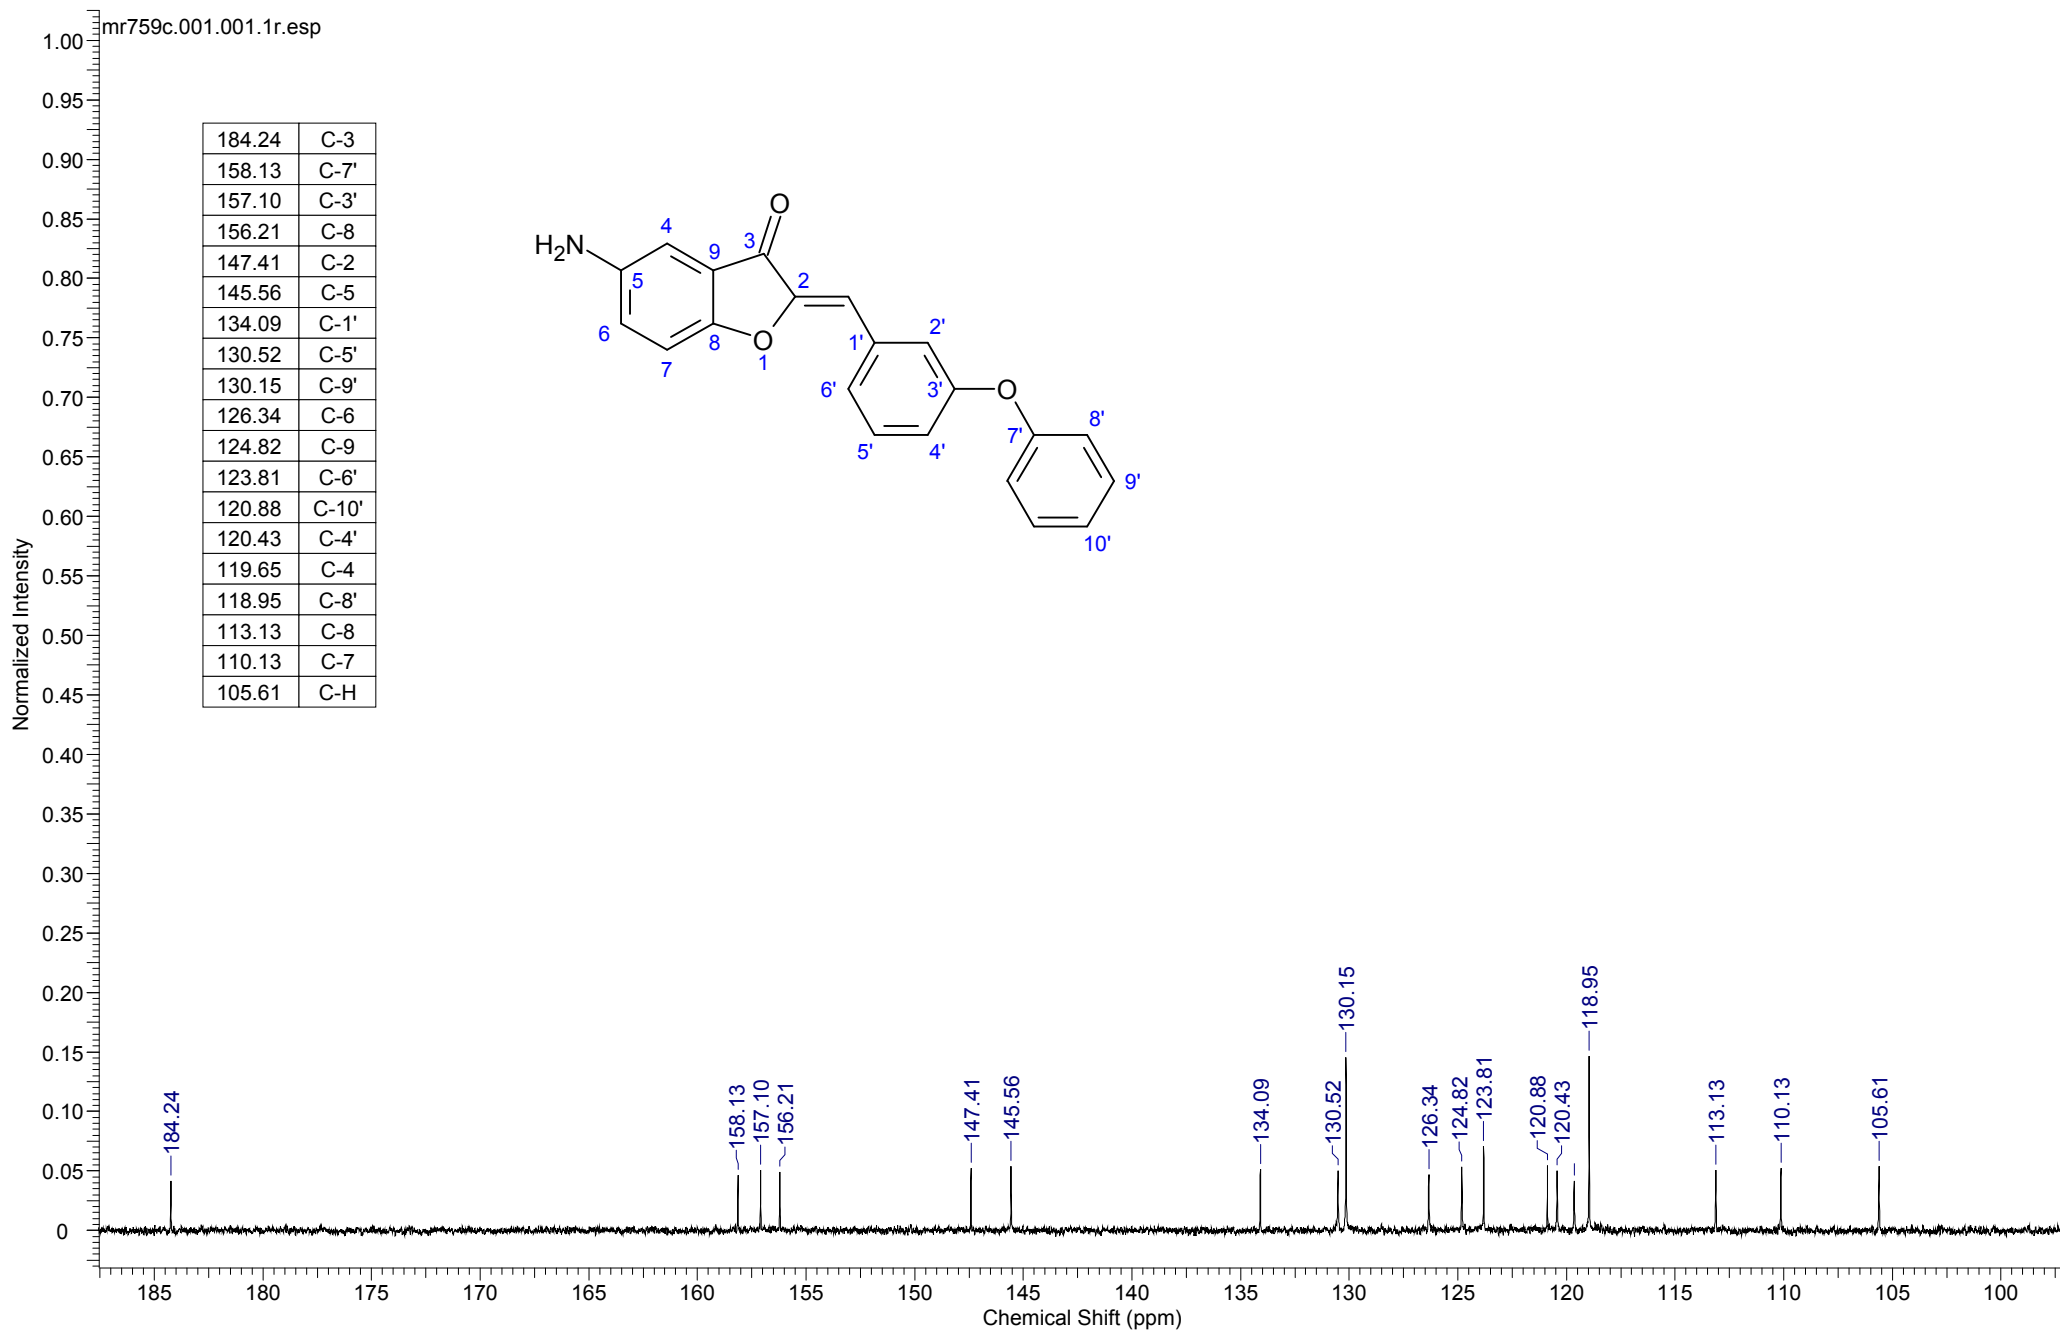

*N*-[(2*Z*)-3-oxo-2-(4-phenoxybenzylidene)-2,3-dihydro-1-benzofuran-5-yl]acetamide

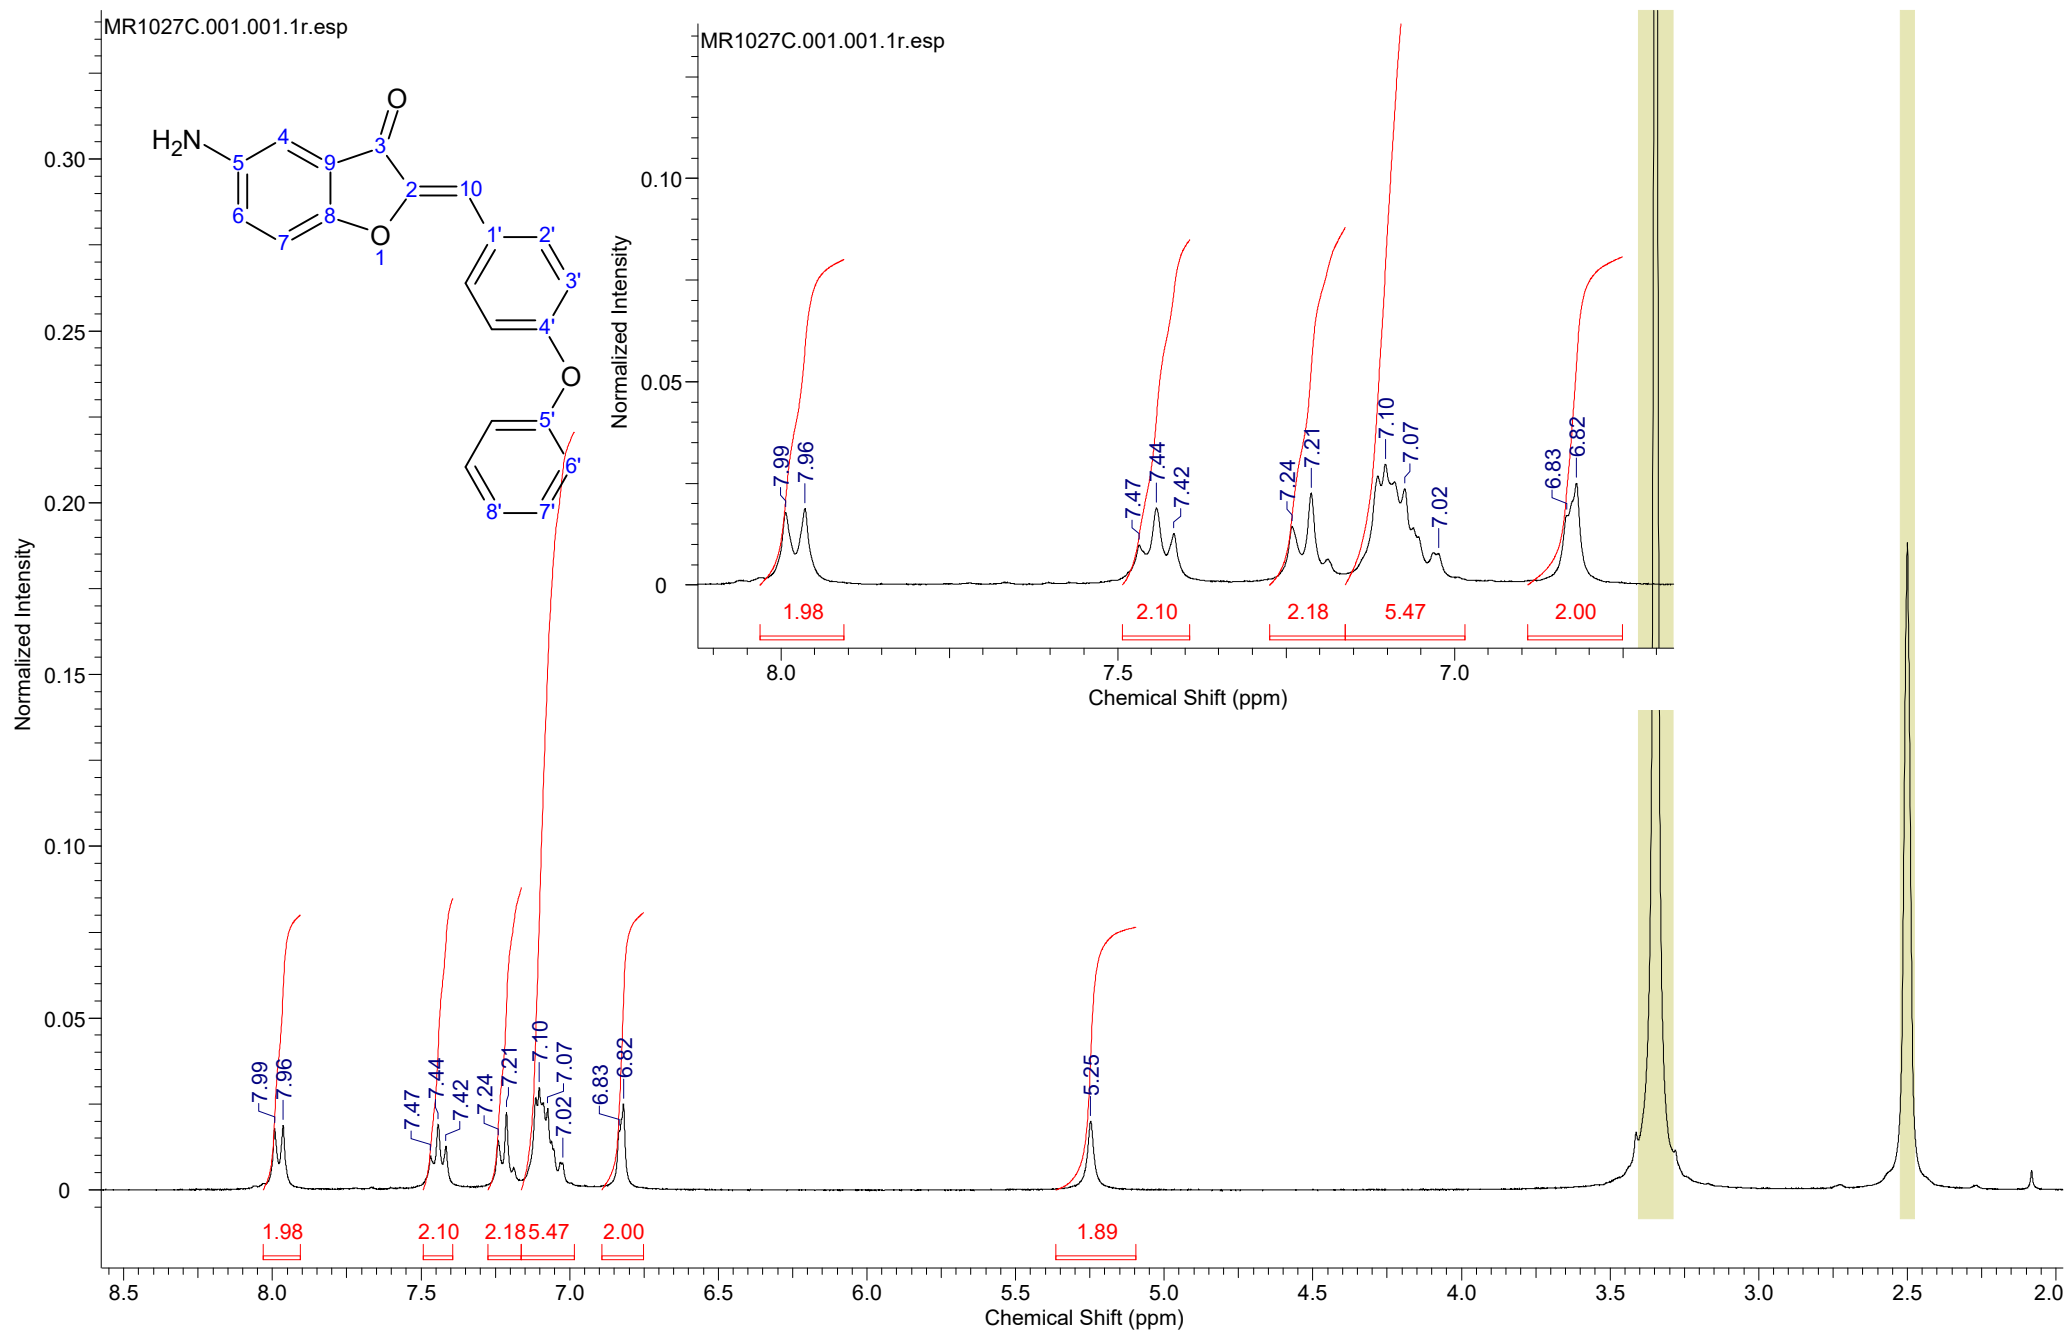

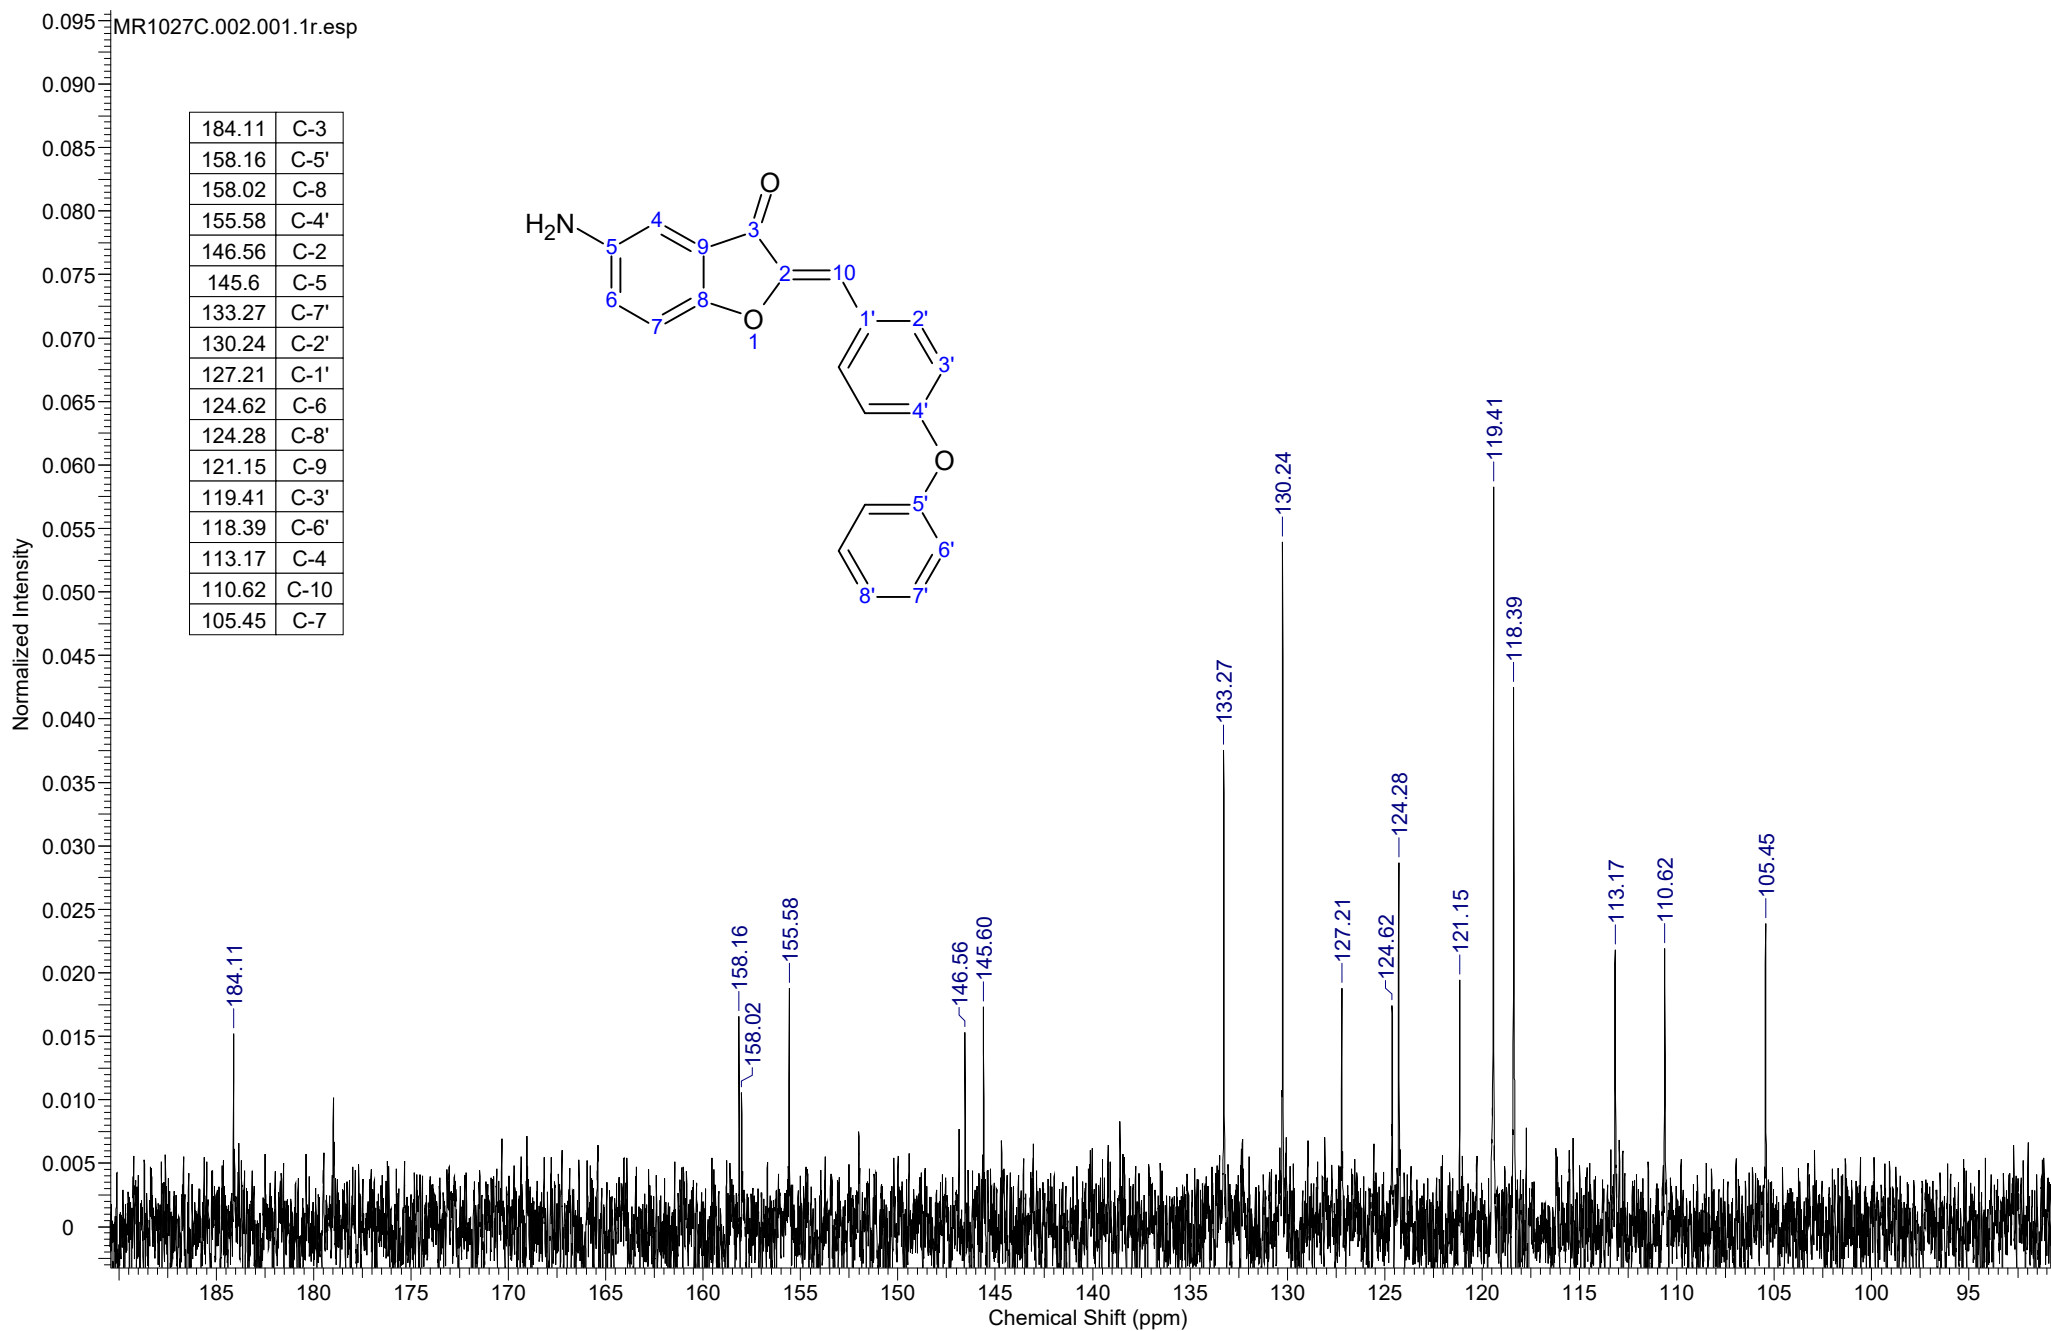

*N*-{[(2*Z*)-3-oxo-2-[2-(propan-2-yloxy)benzylidene]-2,3-dihydro-1-benzofuran-5-yl]acetamide}

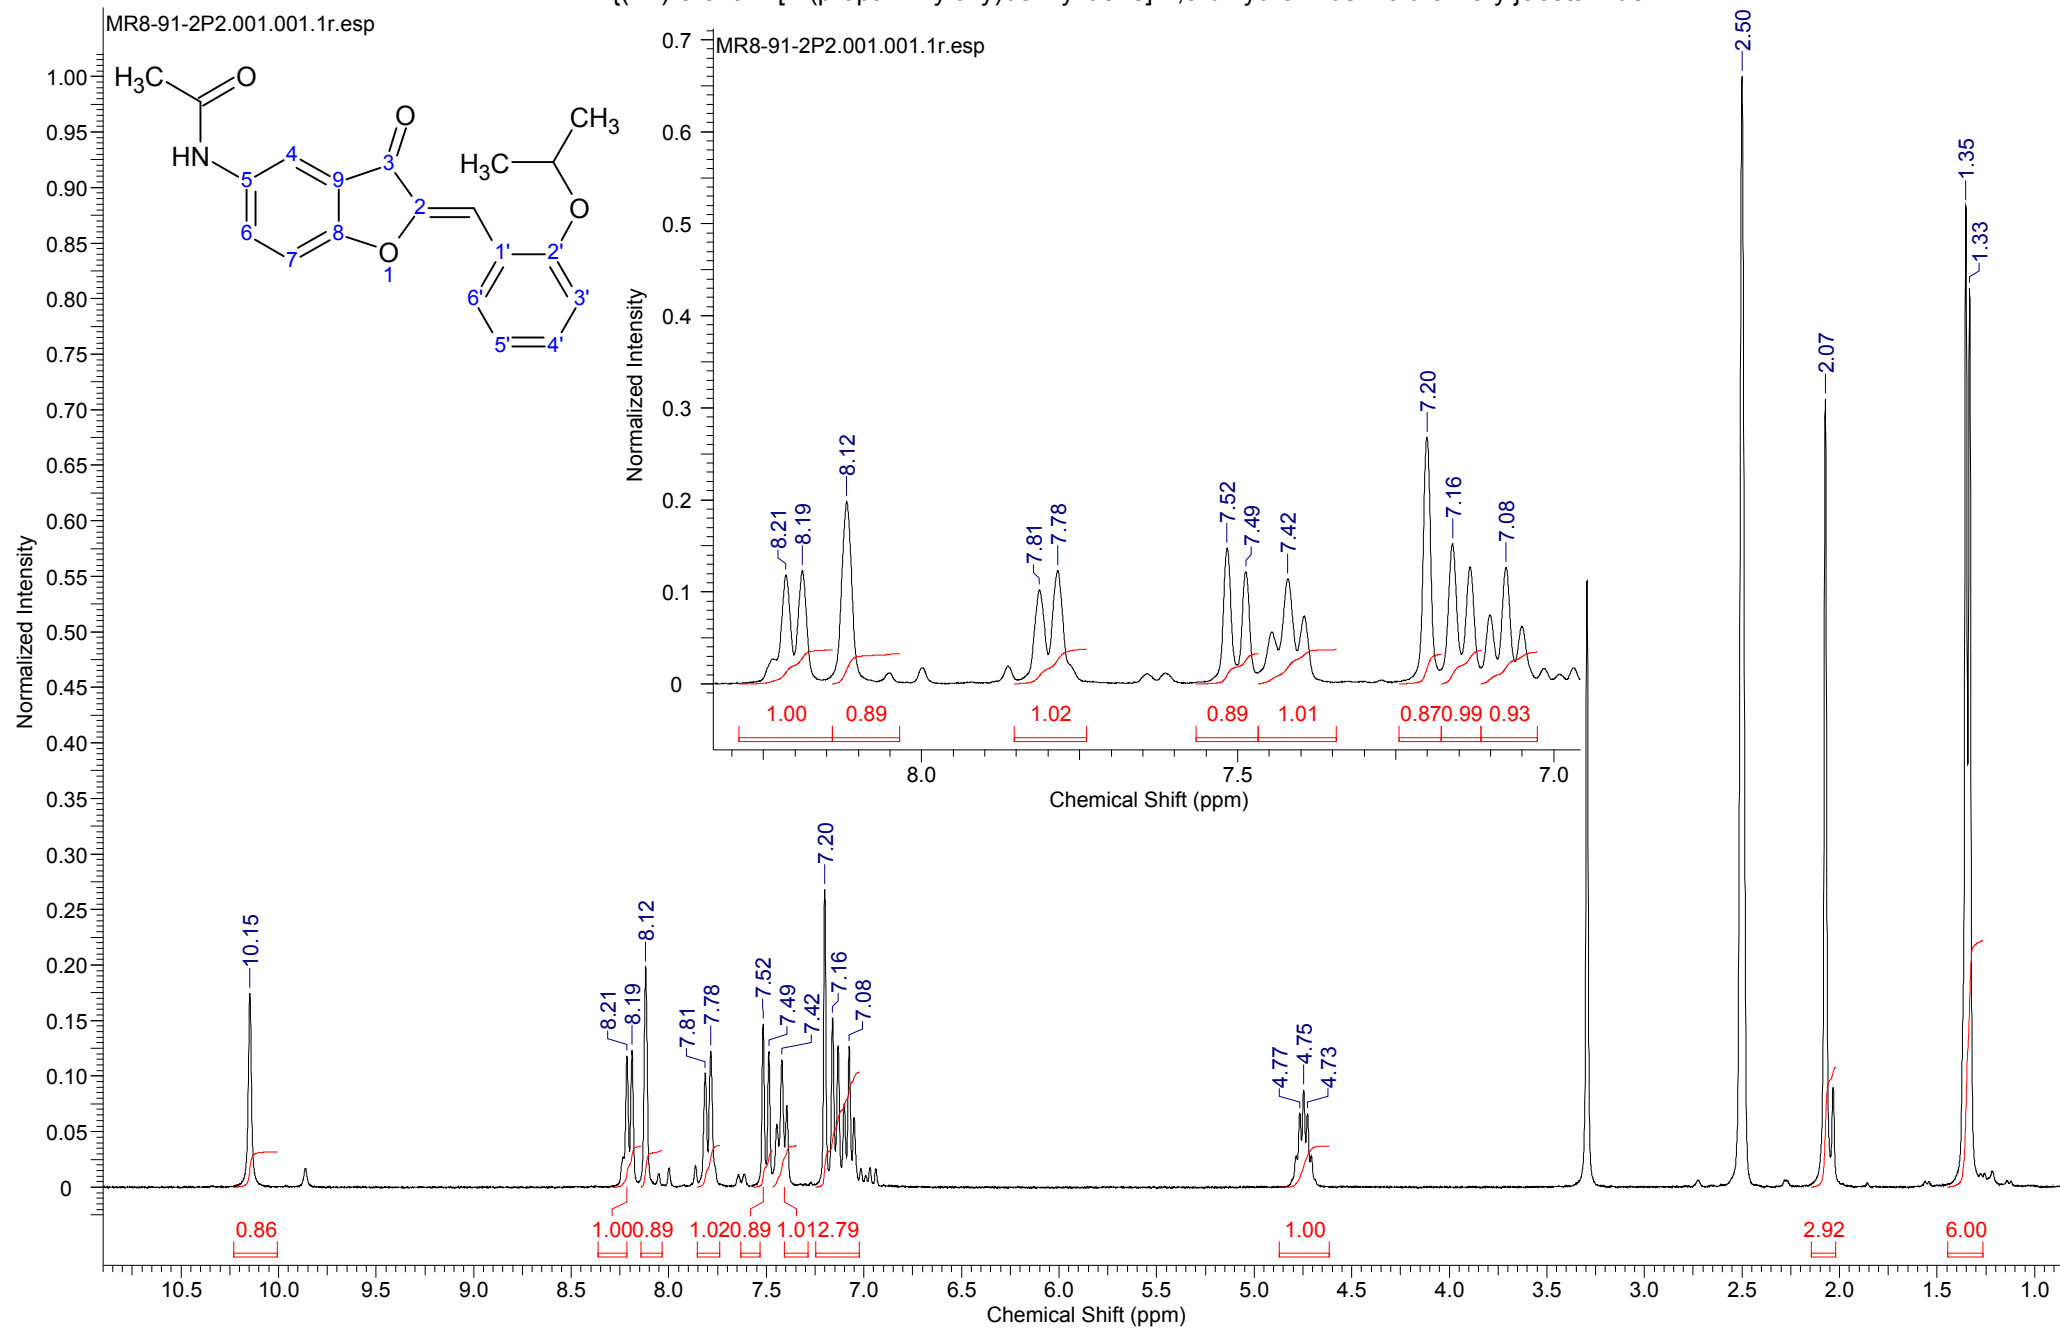

MR8-91-2P2C.001.001.1r.esp

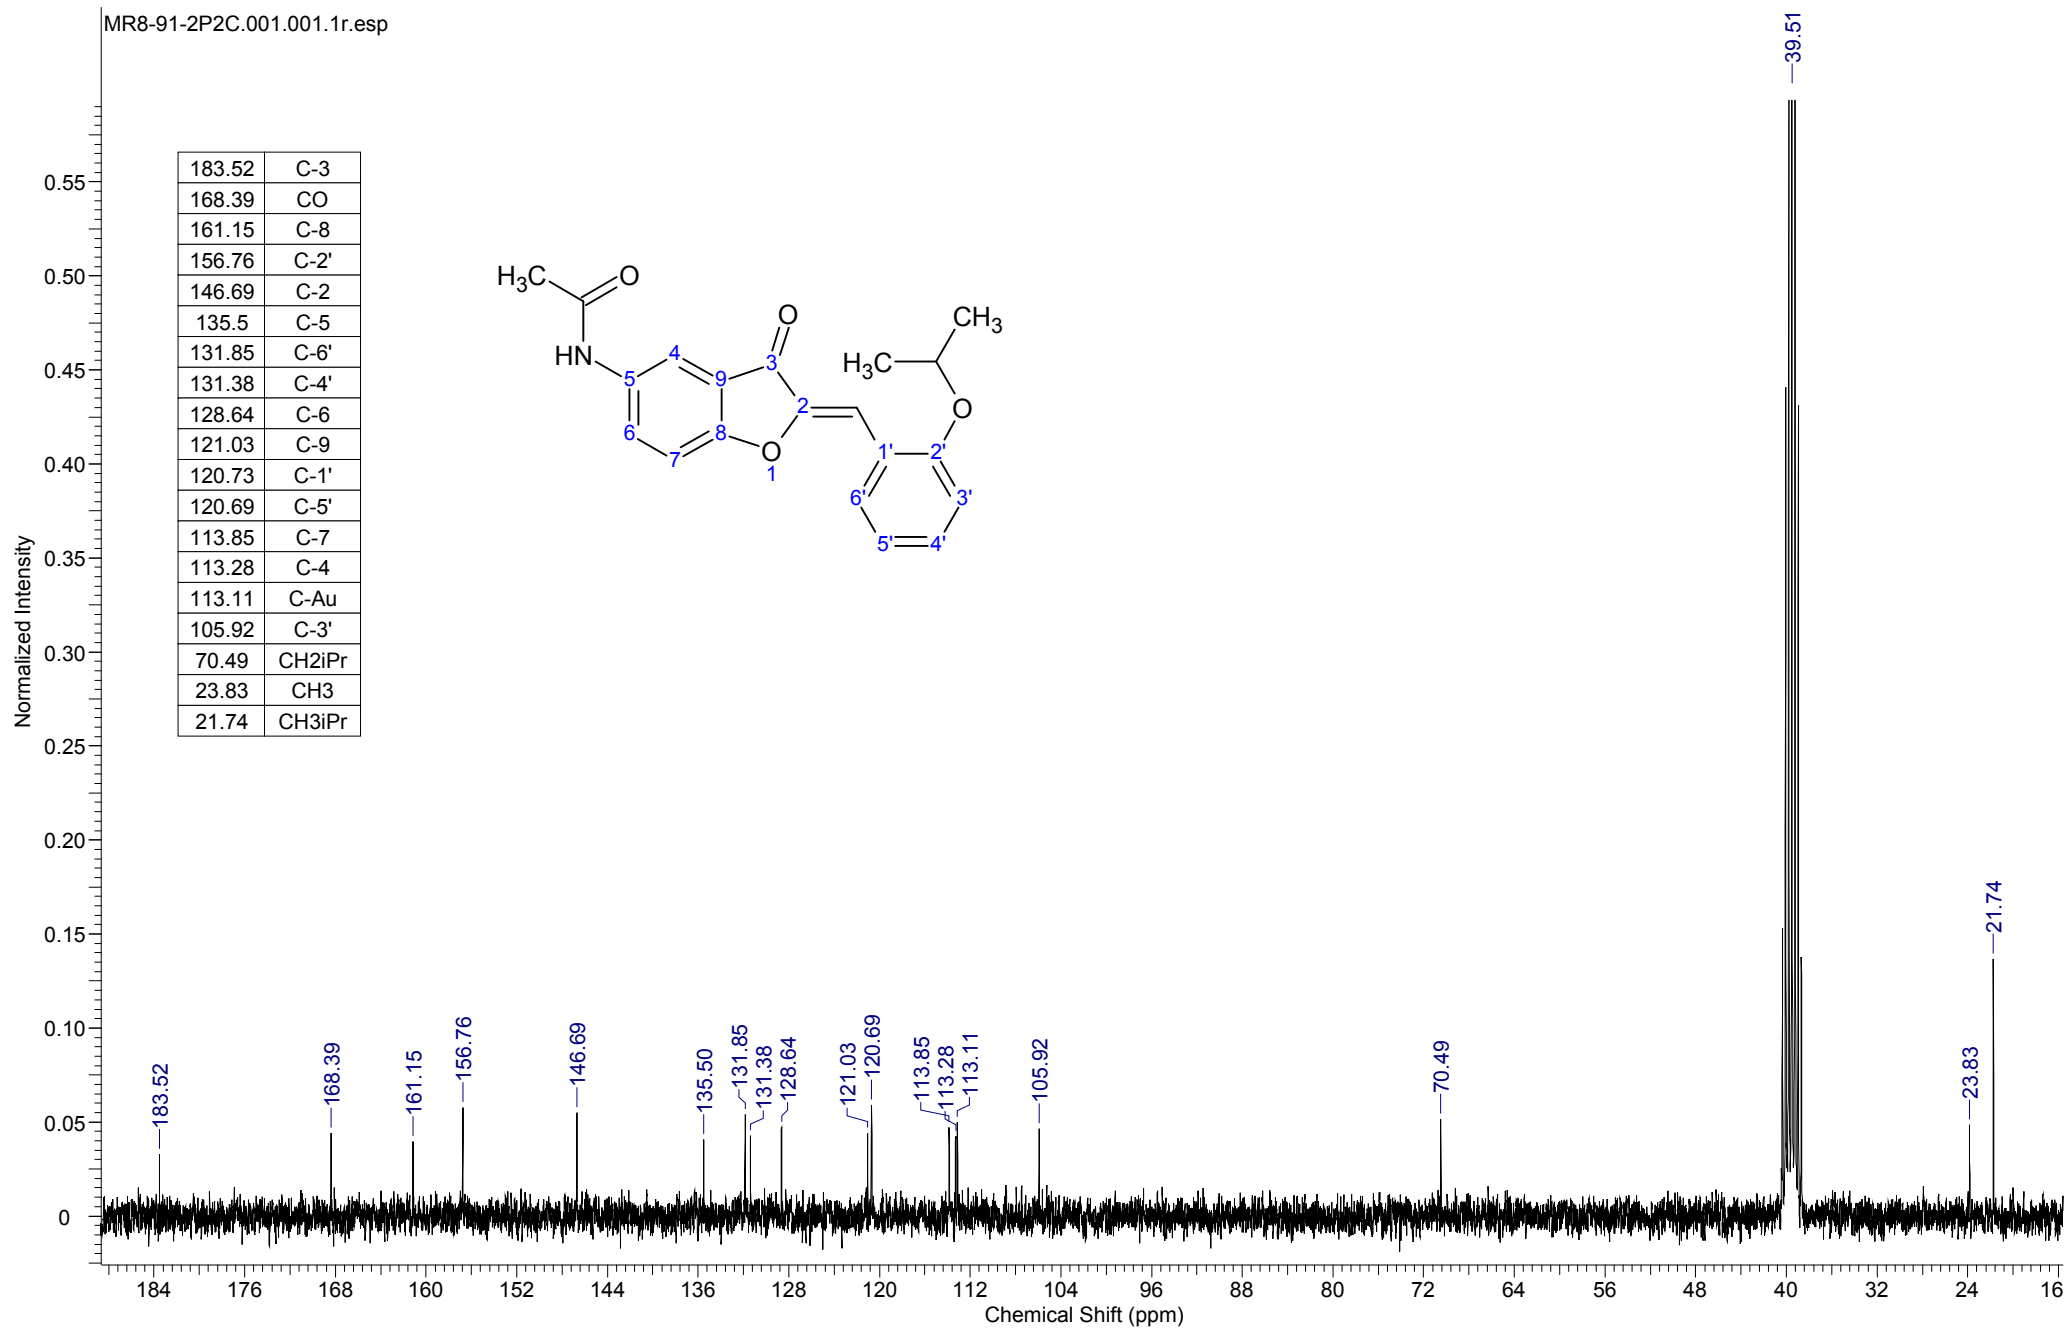

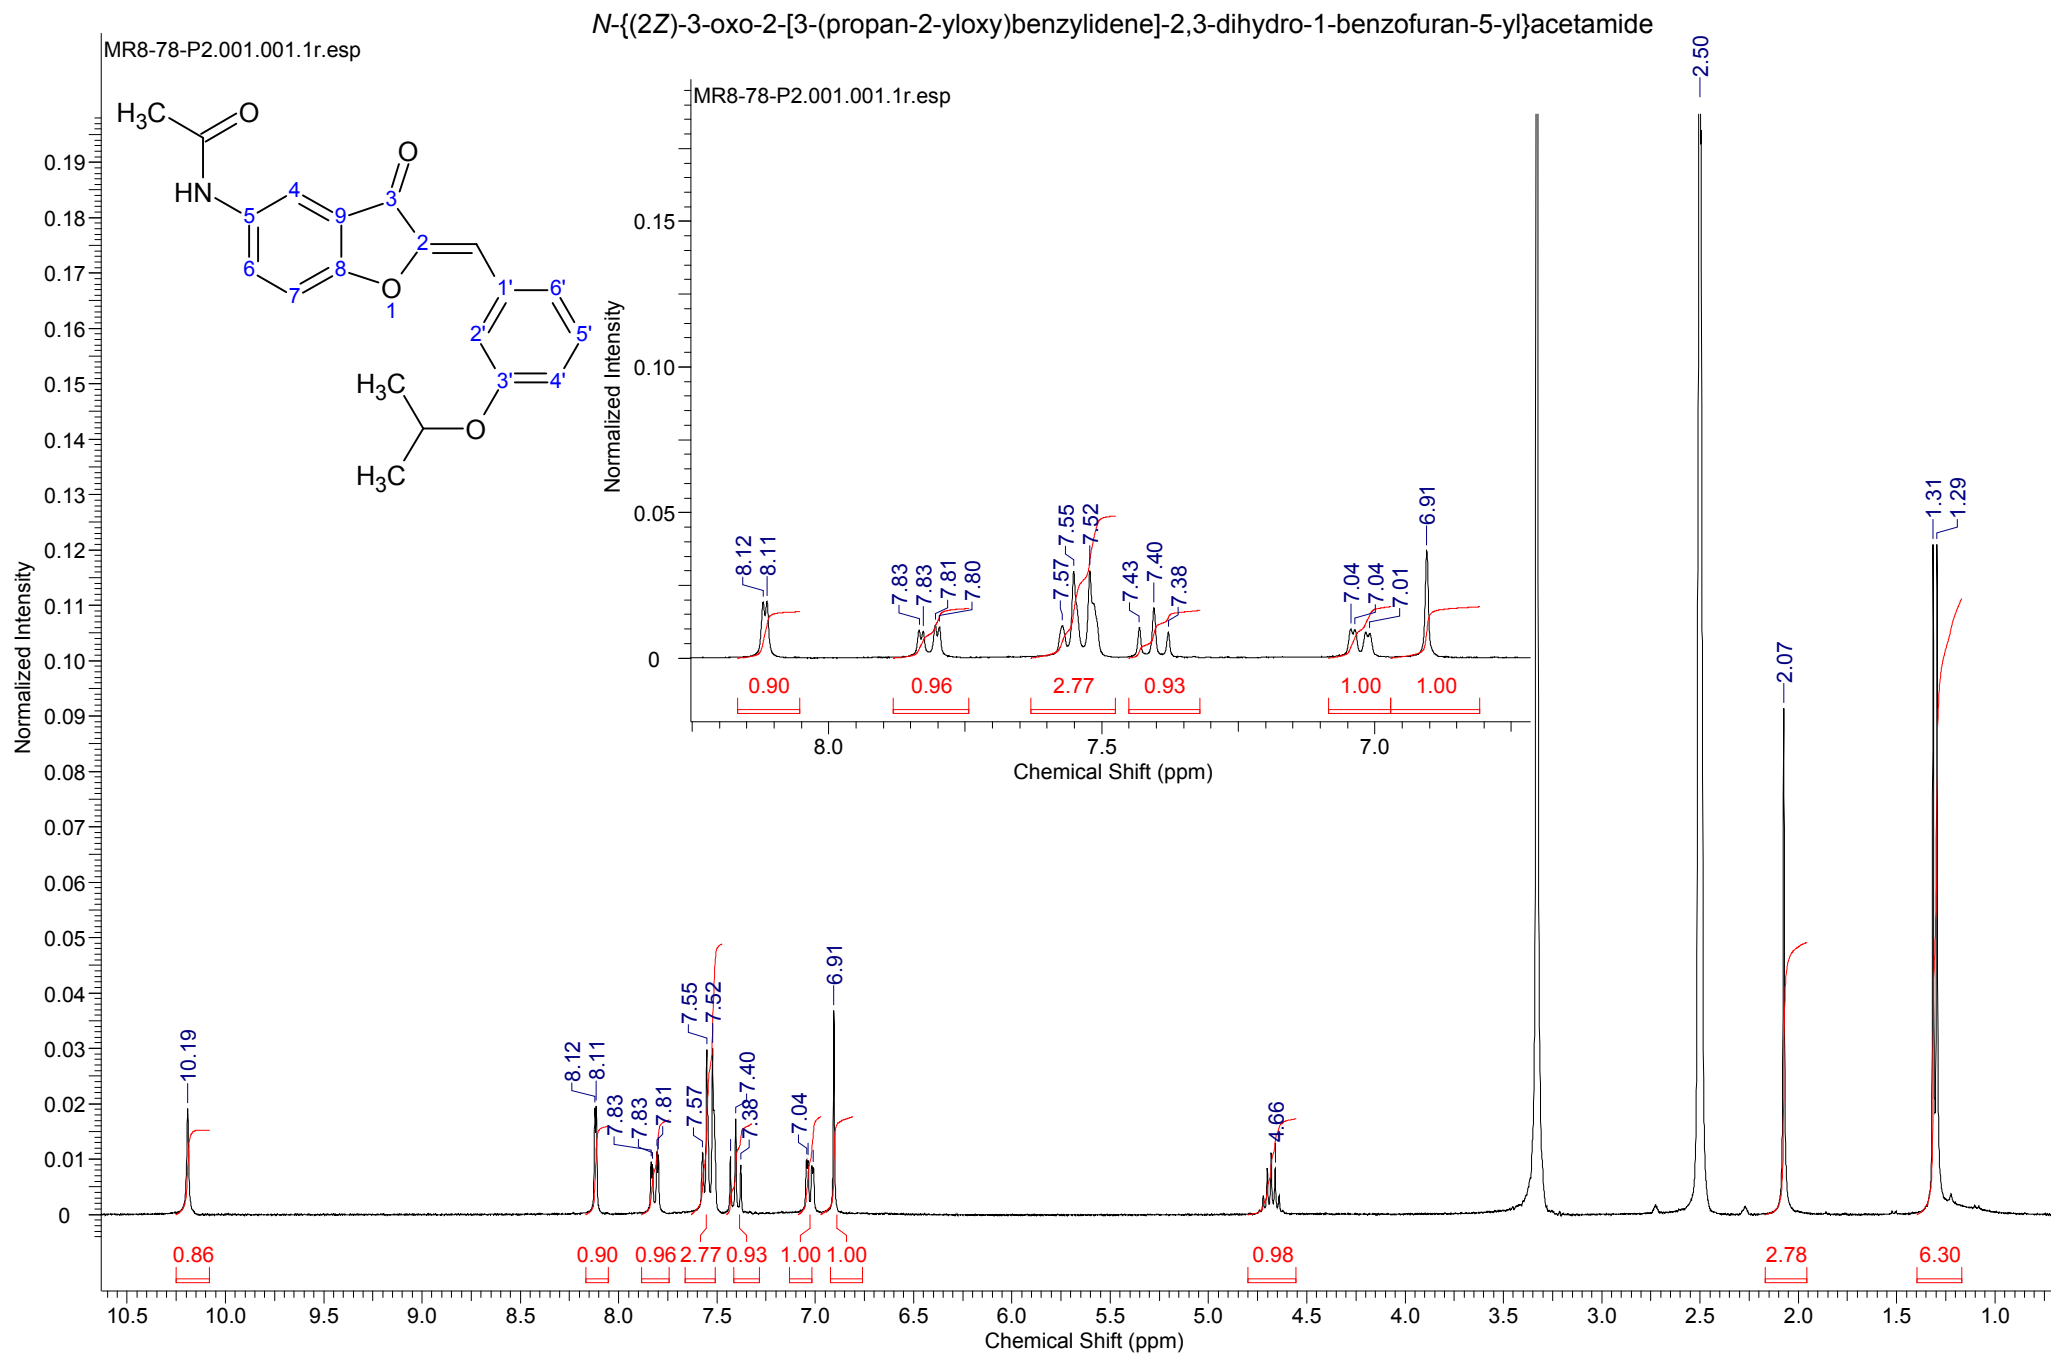



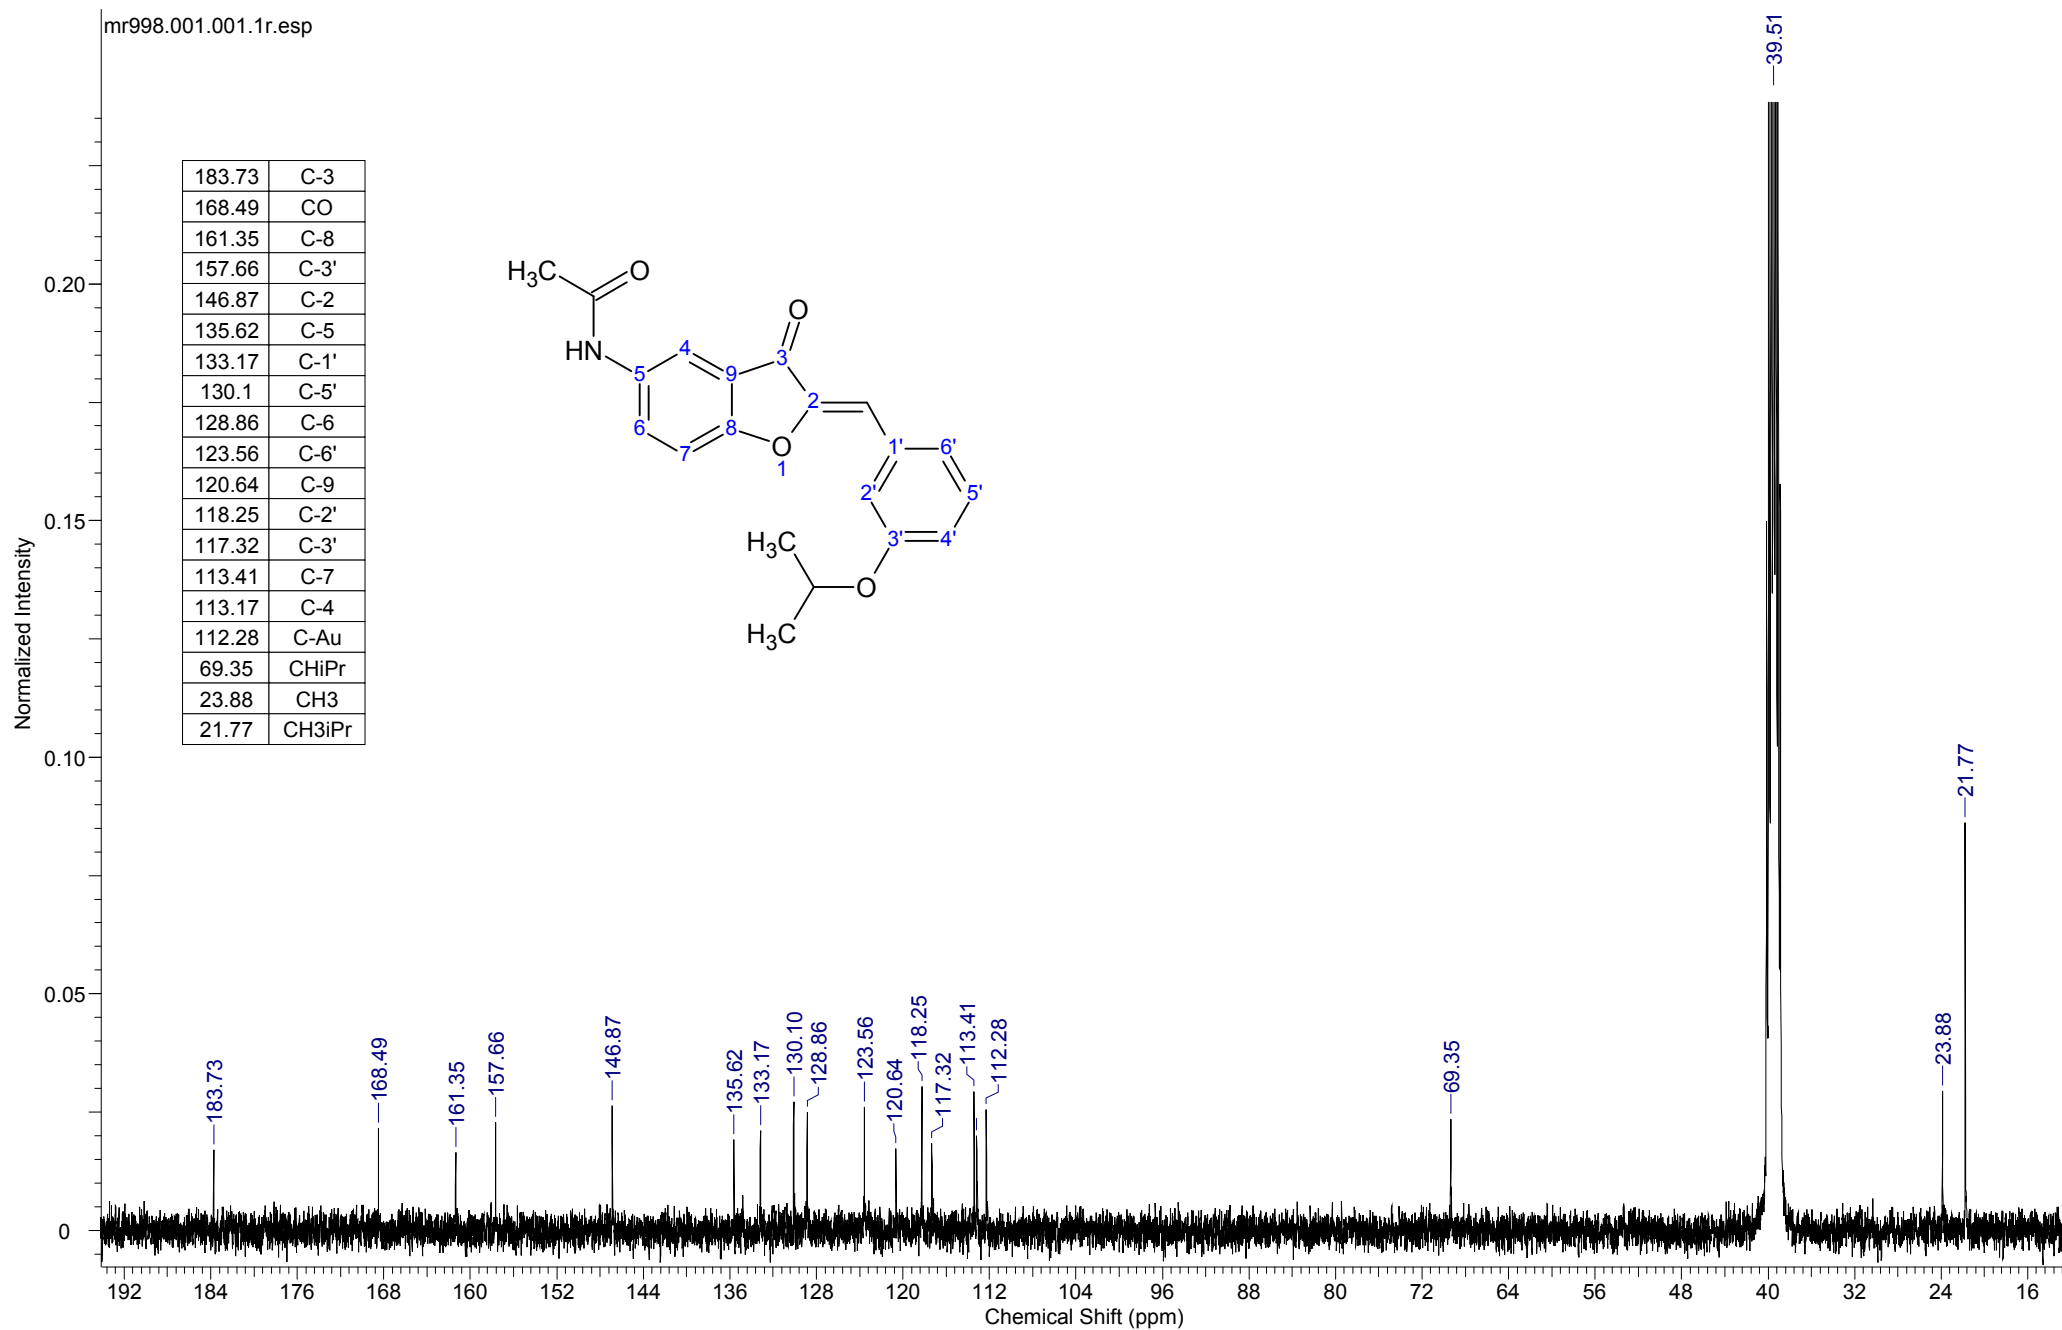

*N*-{[(2*Z*)-3-oxo-2-[4-(propan-2-yloxy)benzylidene]-2,3-dihydro-1-benzofuran-5-yl]acetamide}

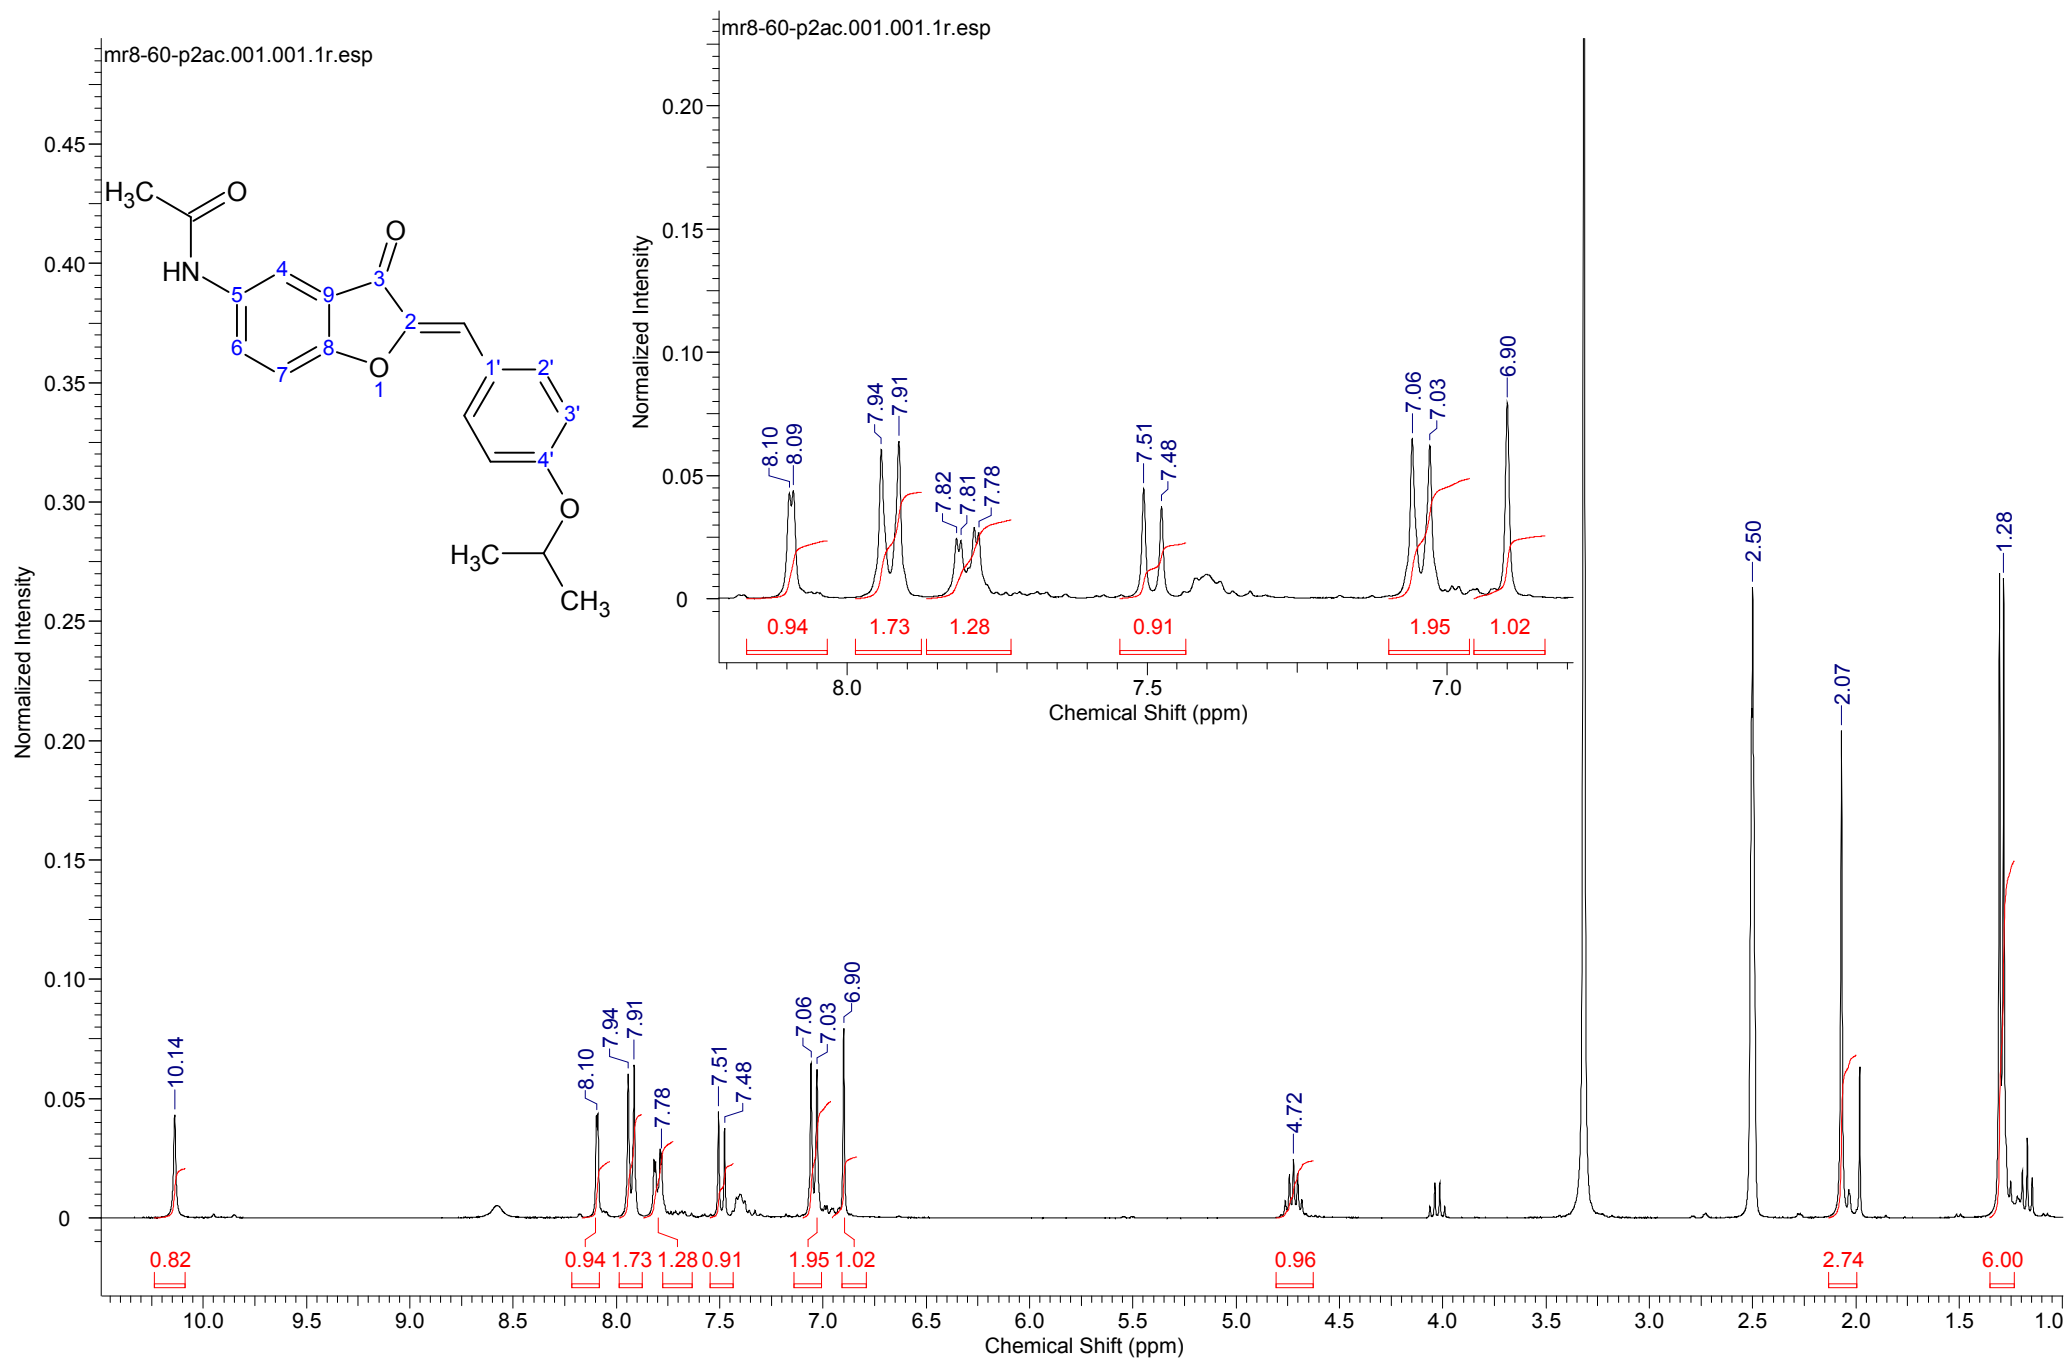

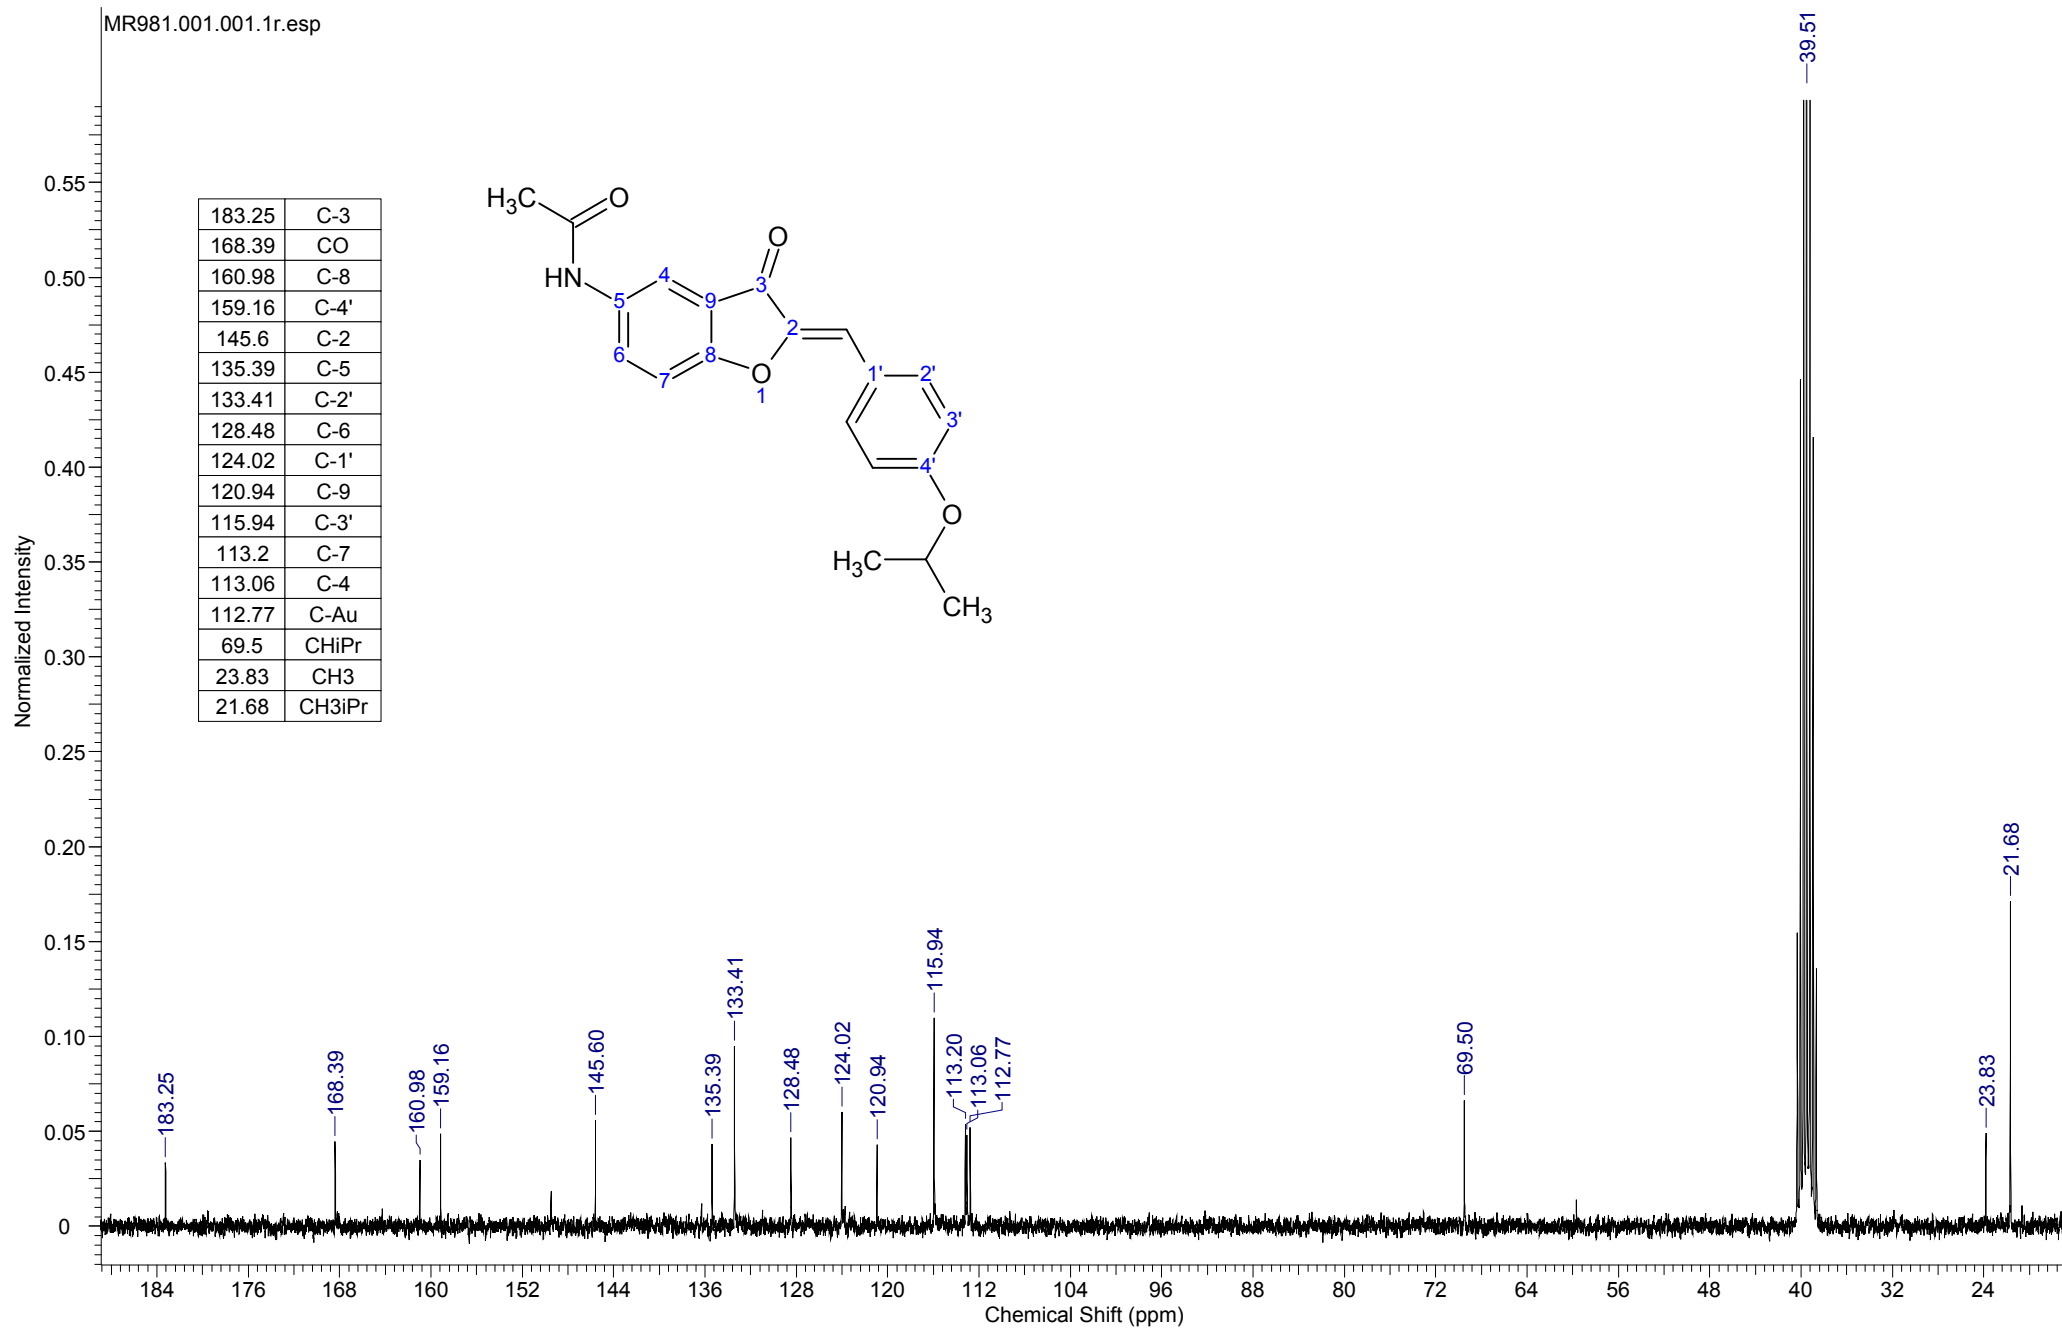

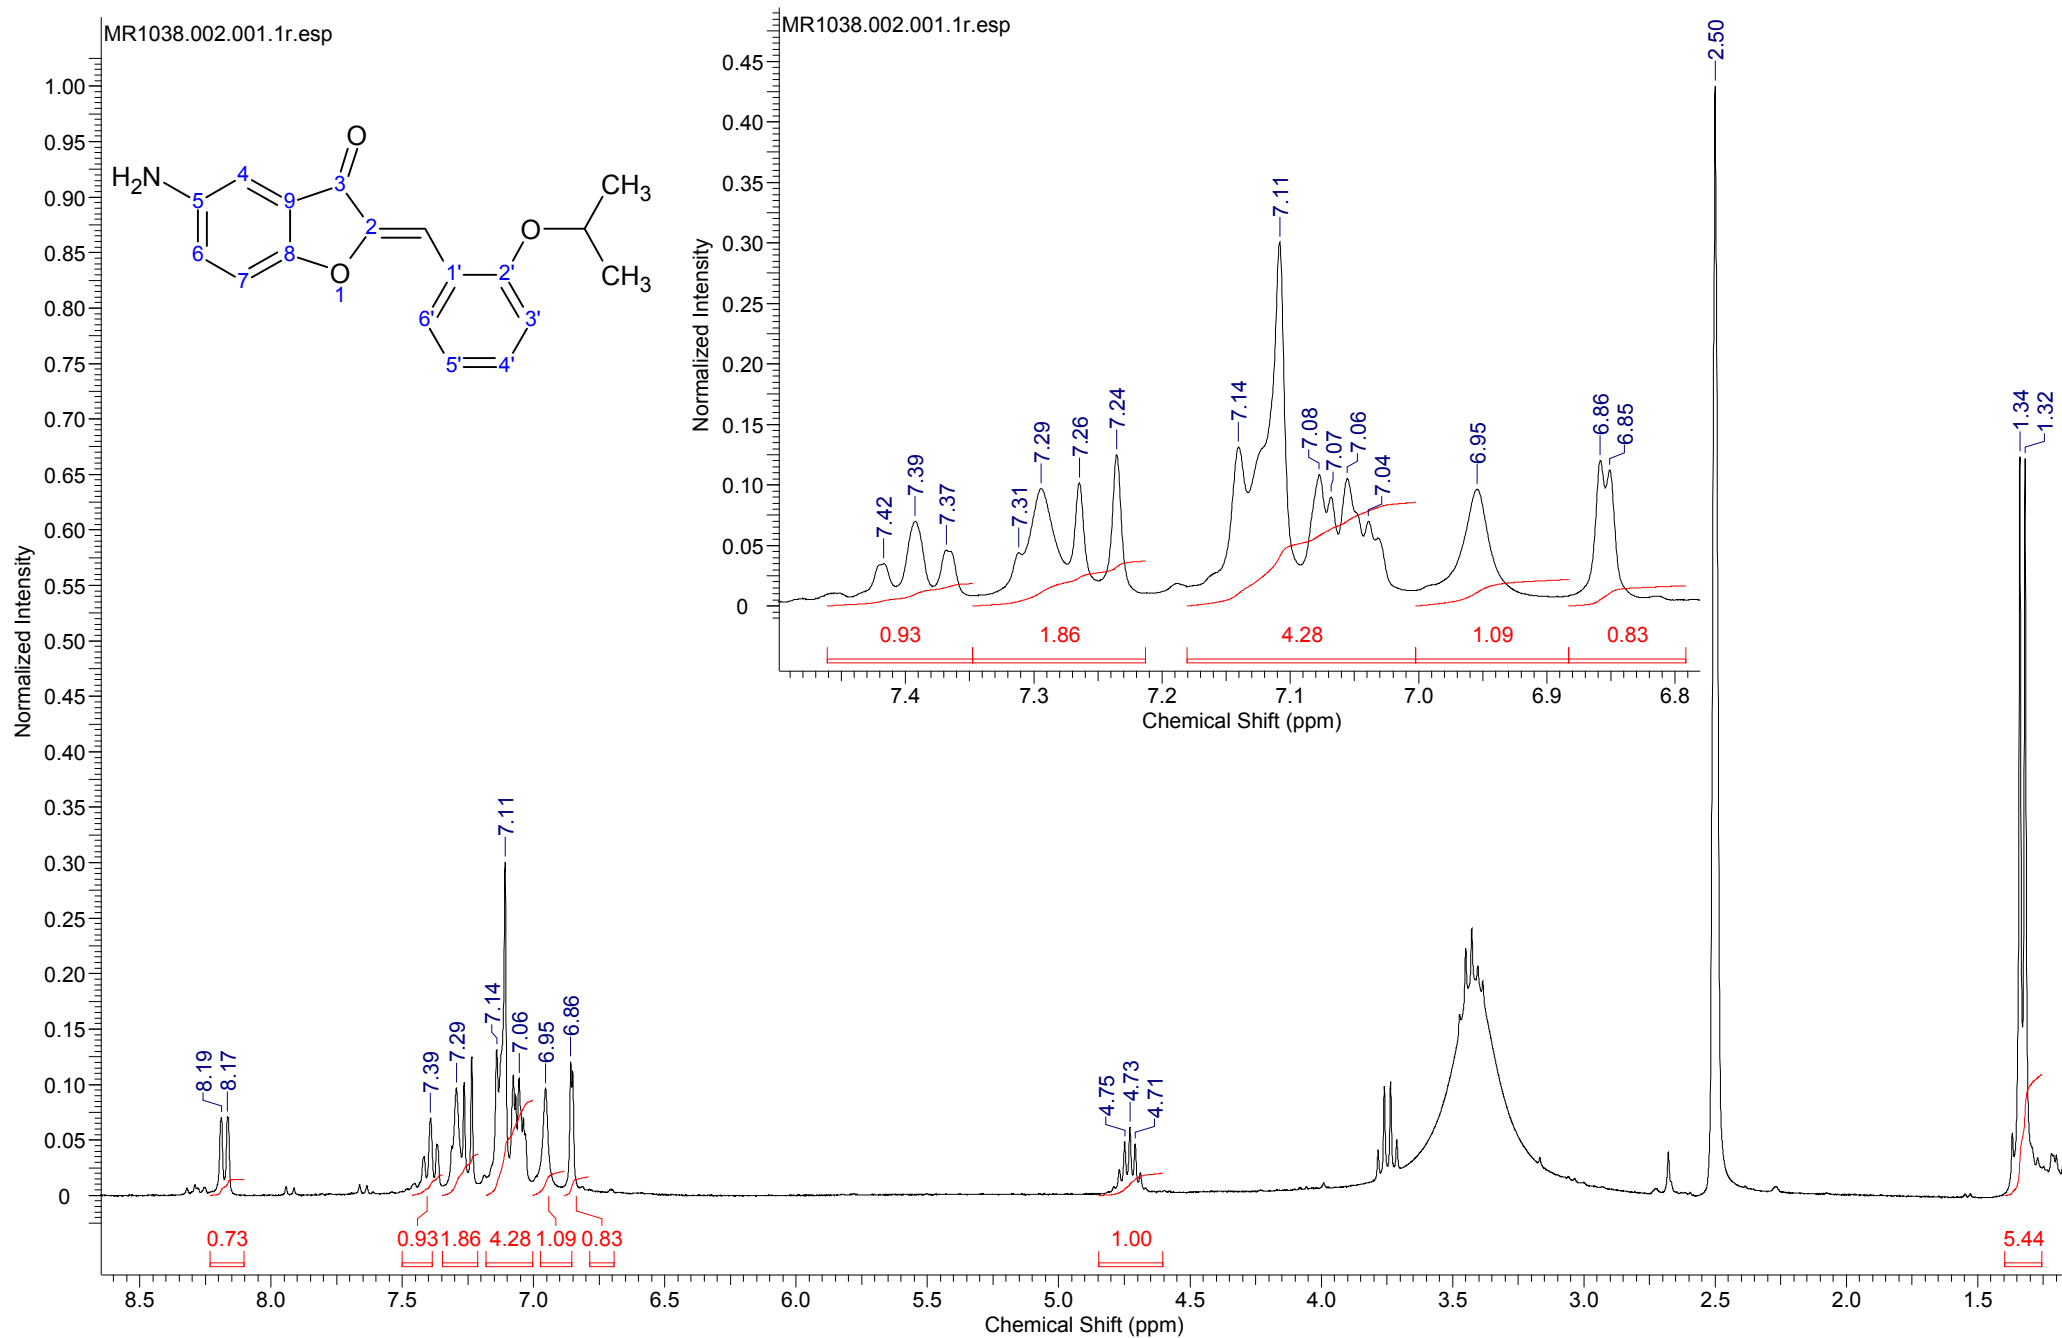

MR1038.001.001.1r.esp

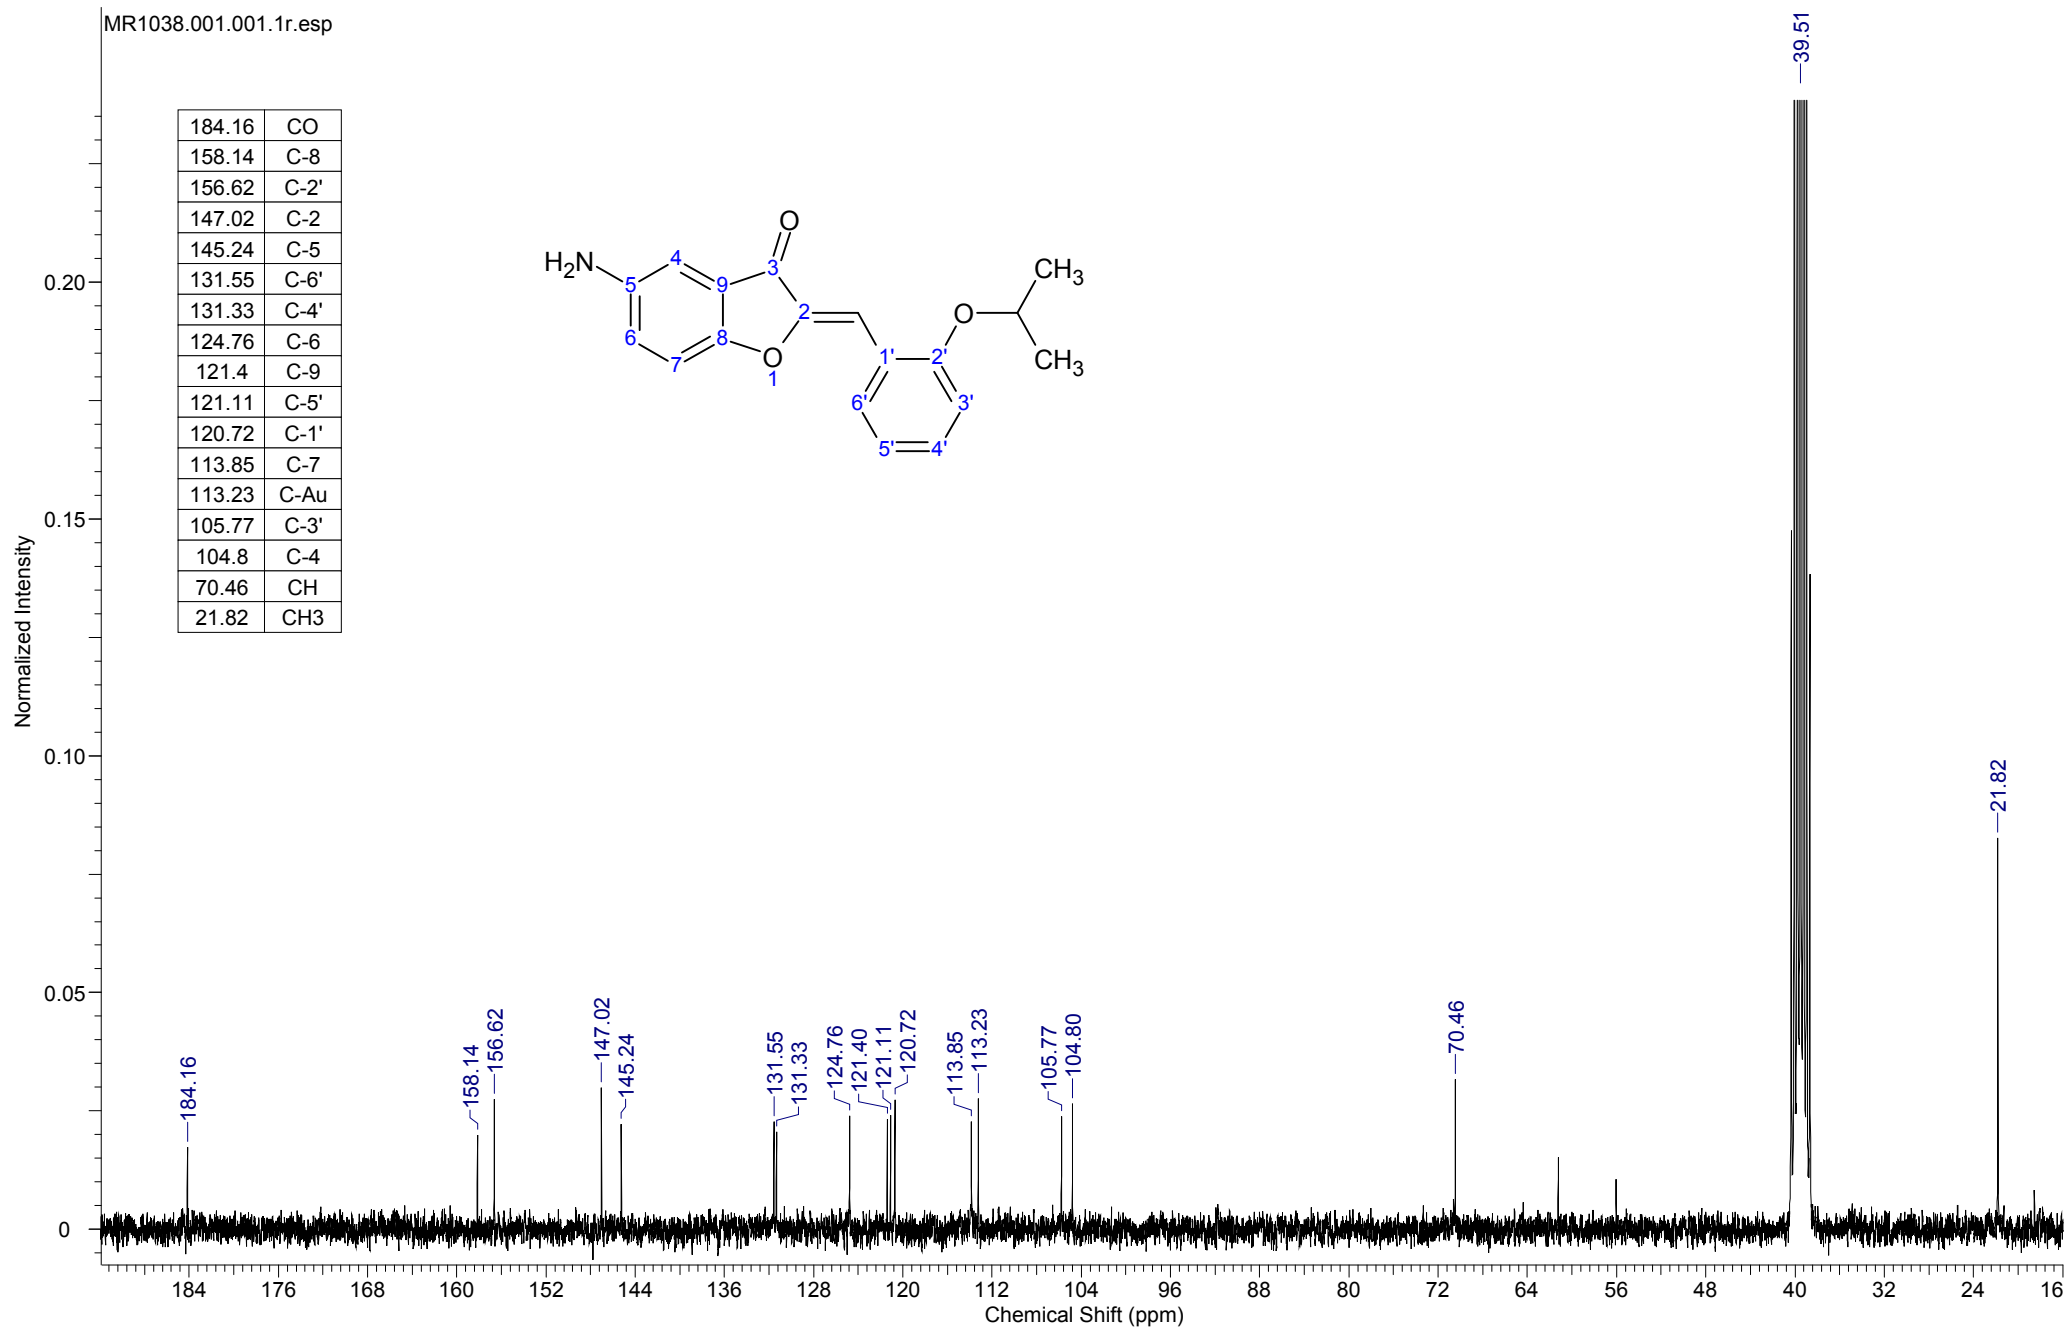

(2Z)-5-amino-2-[3-(propan-2-yloxy)benzylidene]-1-benzofuran-3(2H)-one

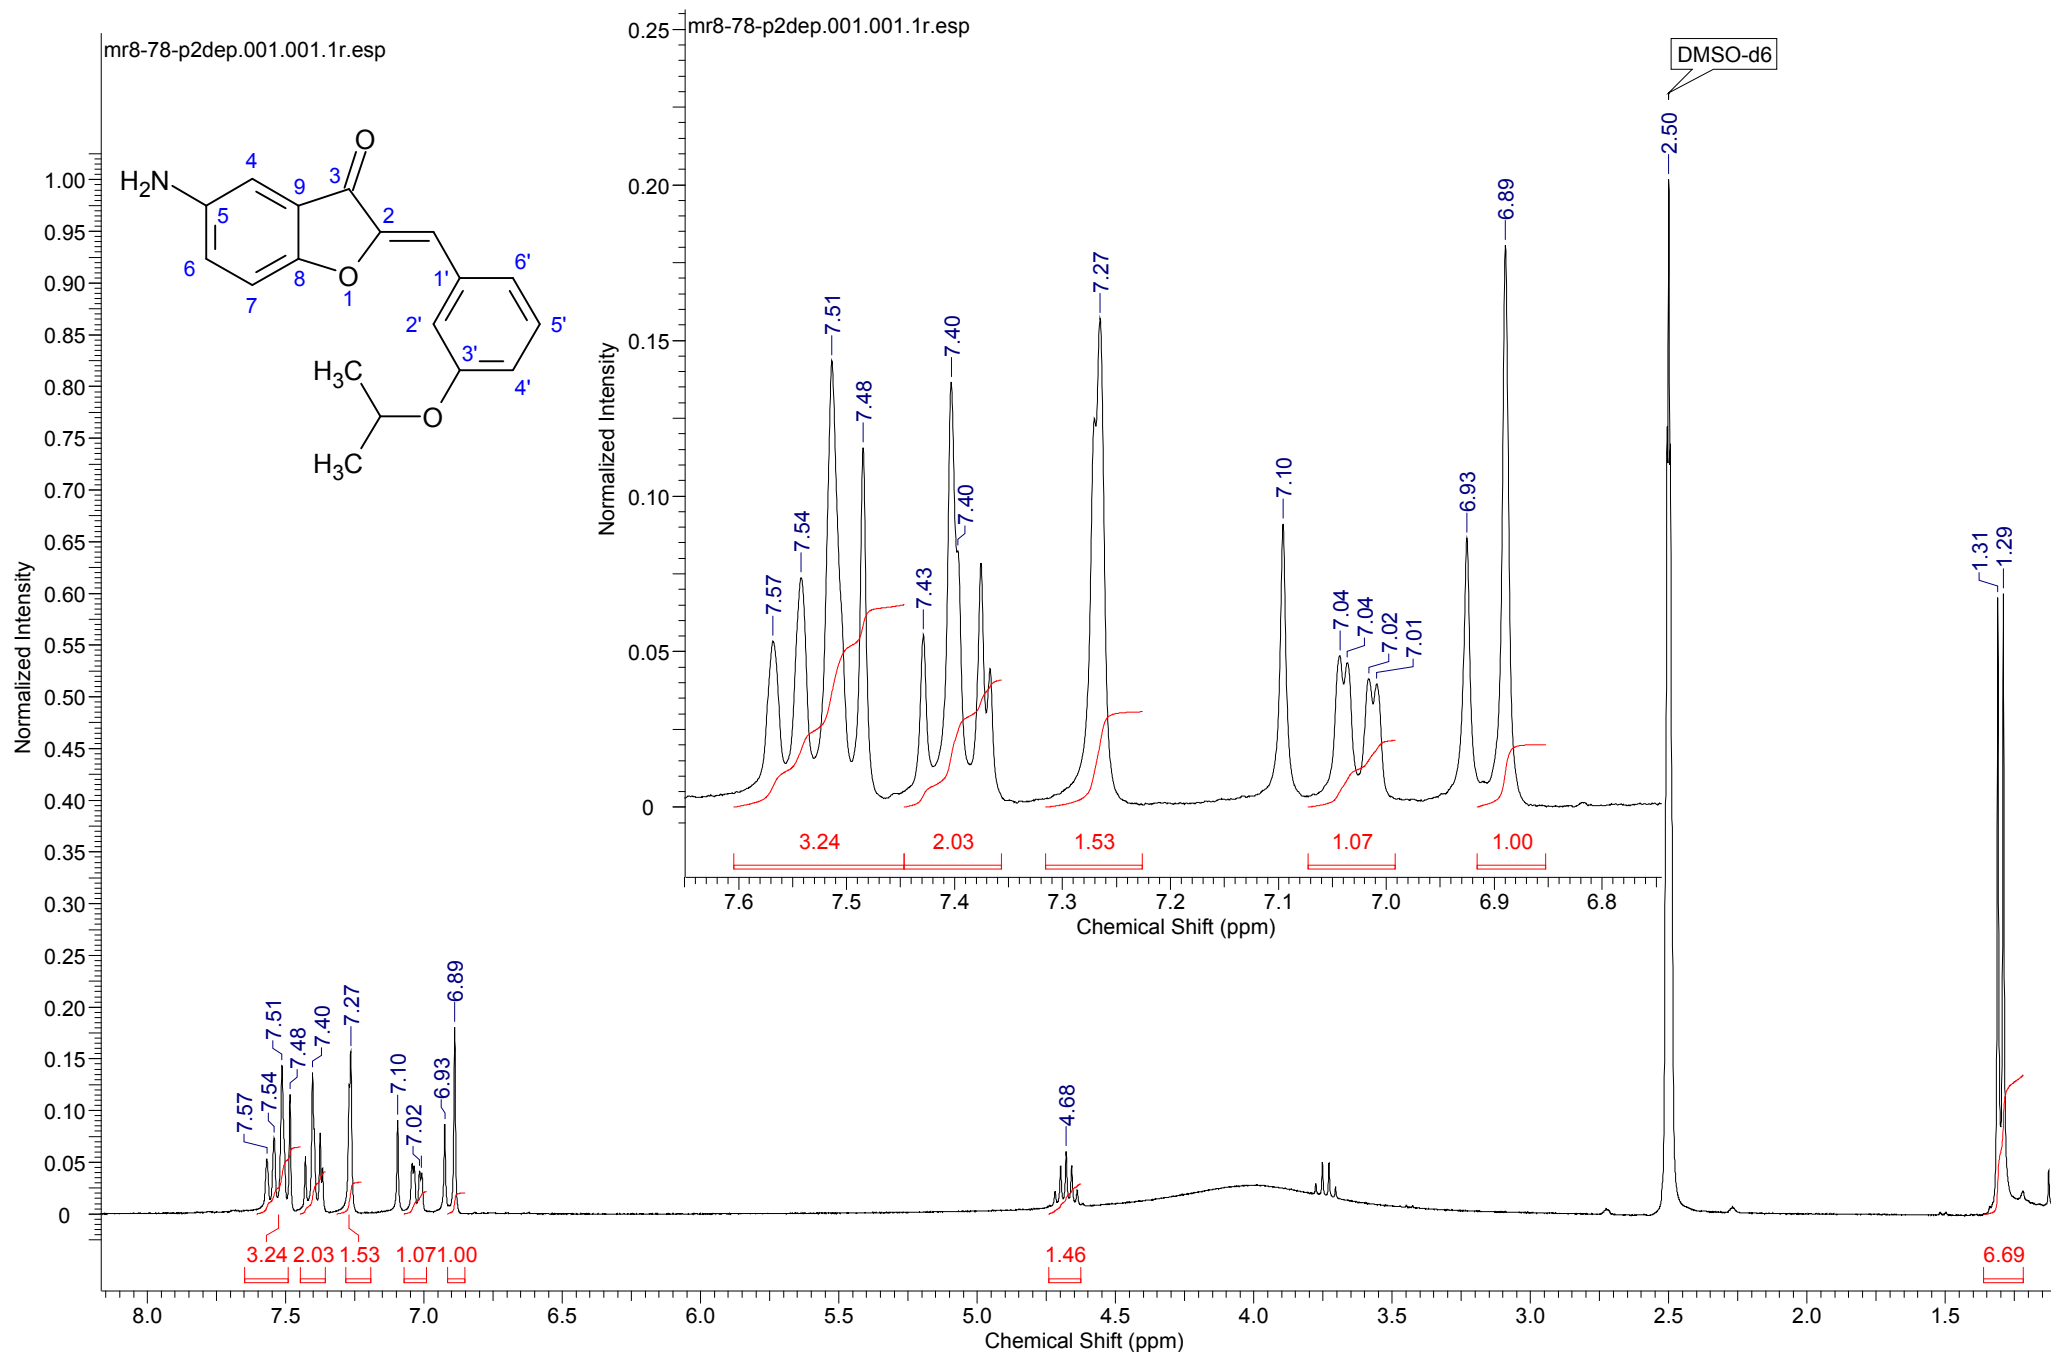



(2Z)-5-amino-2-[4-(propan-2-yloxy)benzylidene]-1-benzofuran-3(2H)-one

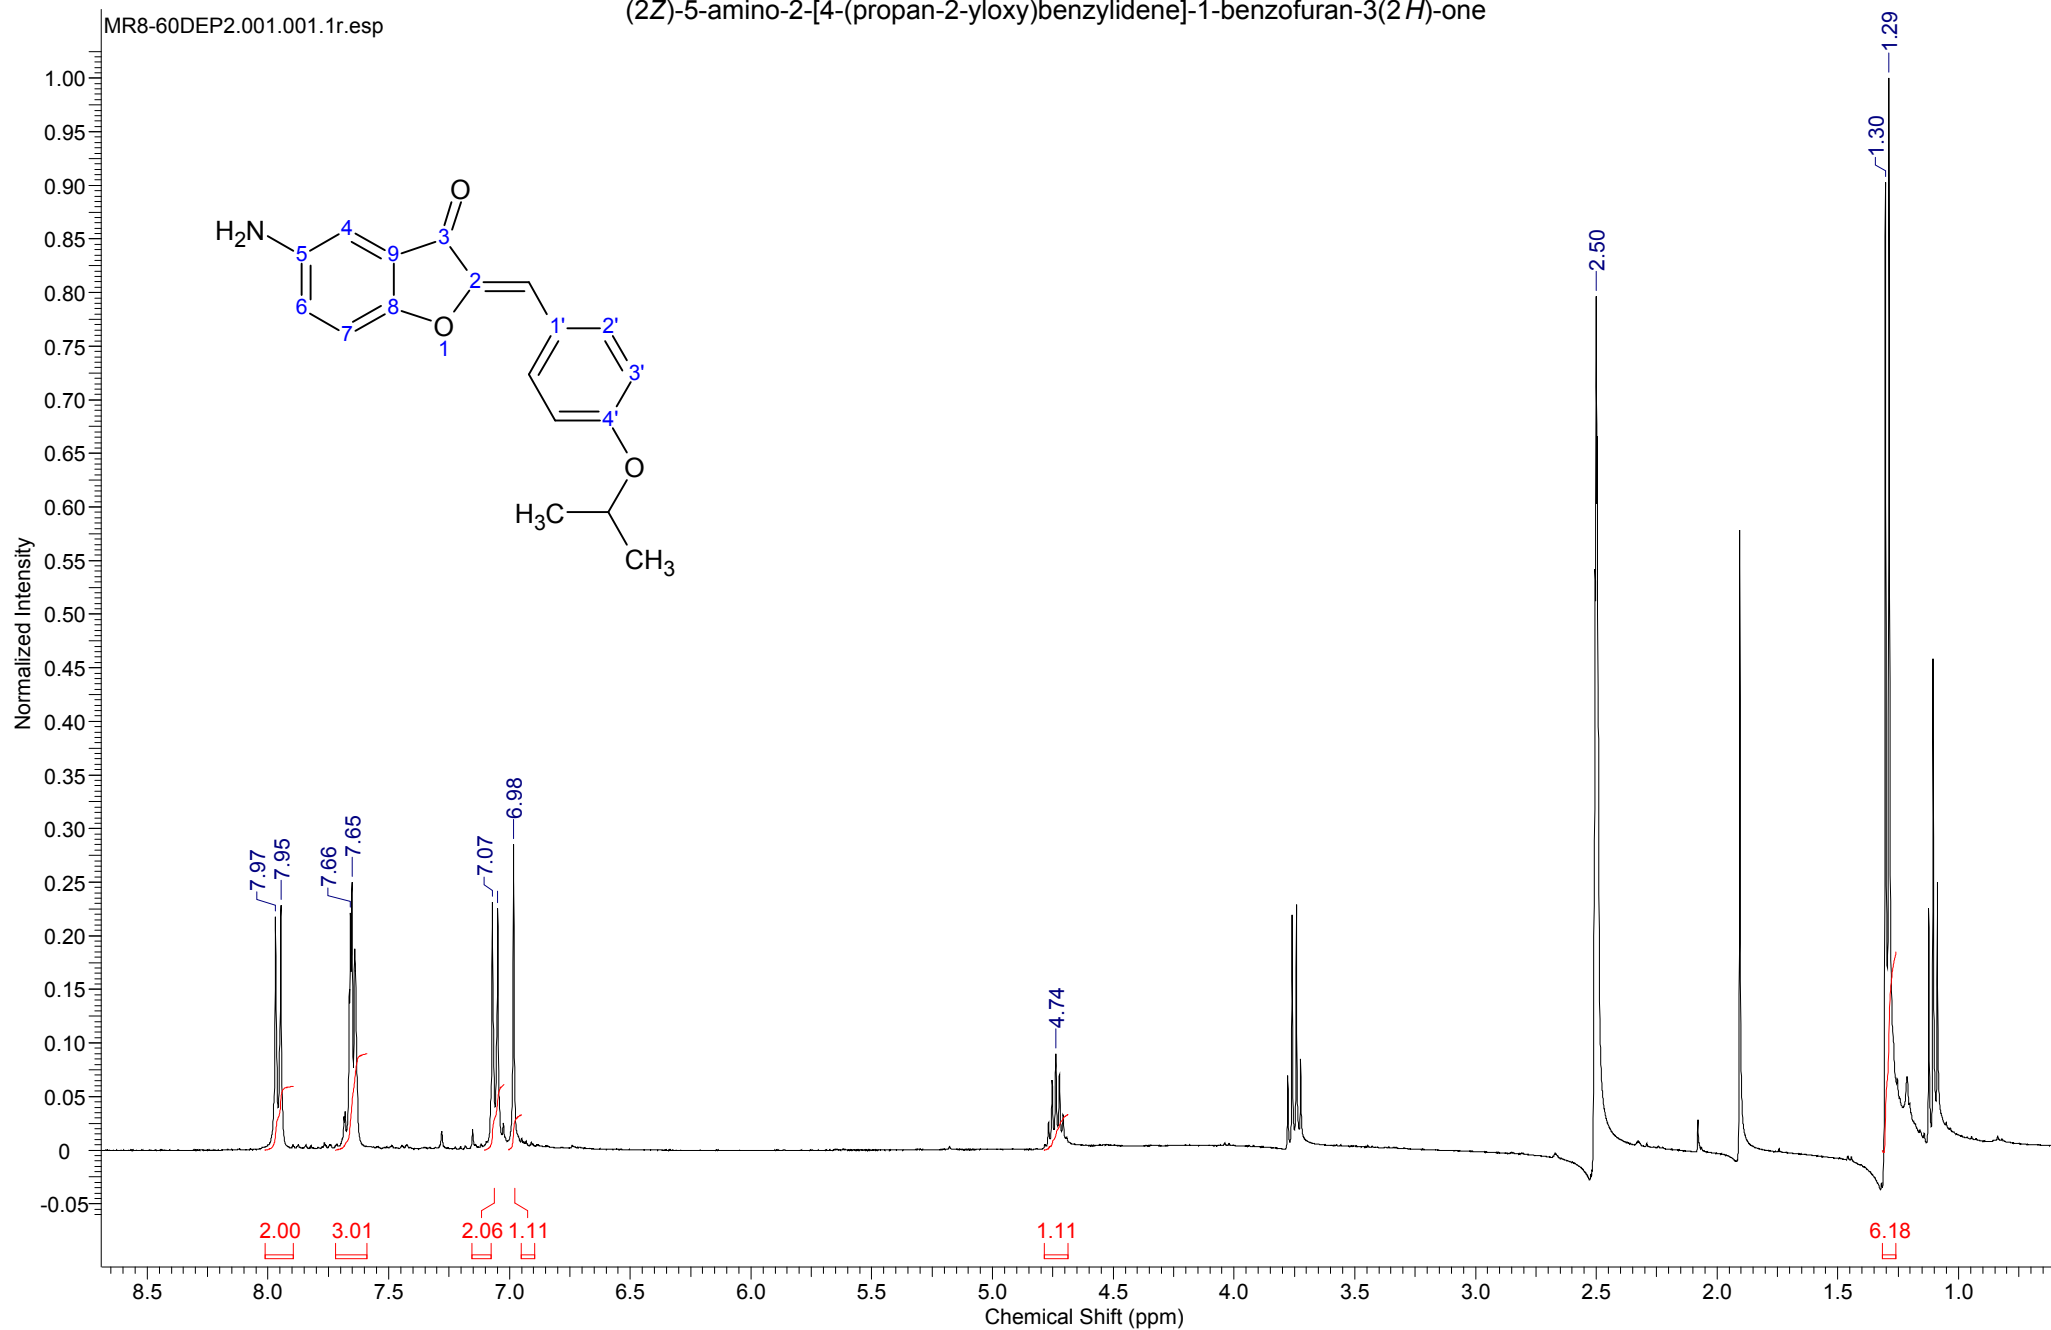



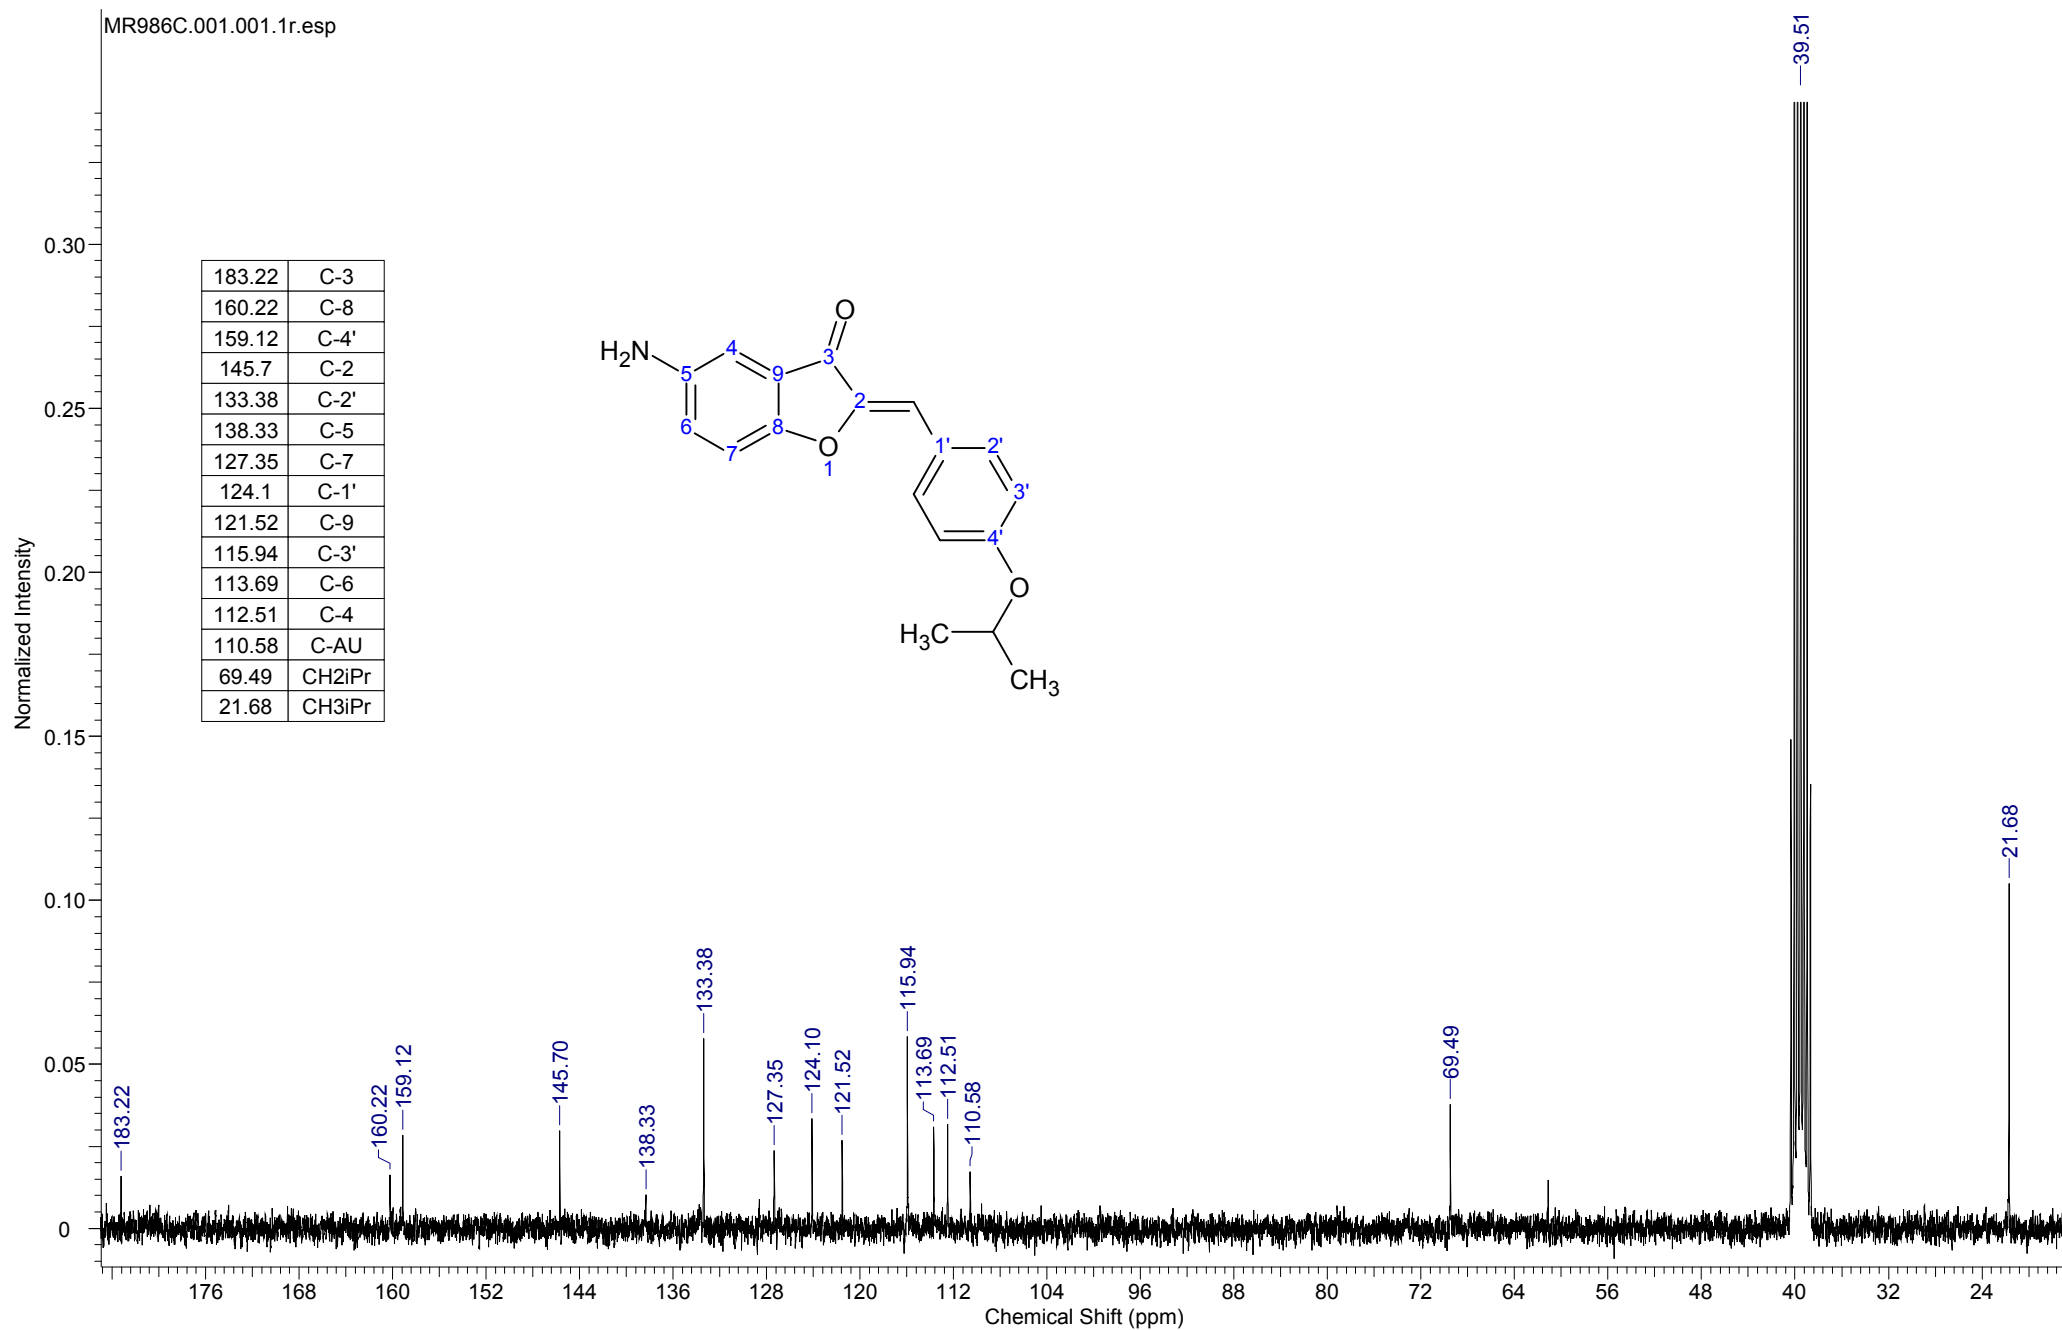

*N*-[(2*Z*)-2-(2-fluorobenzylidene)-3-oxo-2,3-dihydro-1-benzofuran-5-yl]acetamide

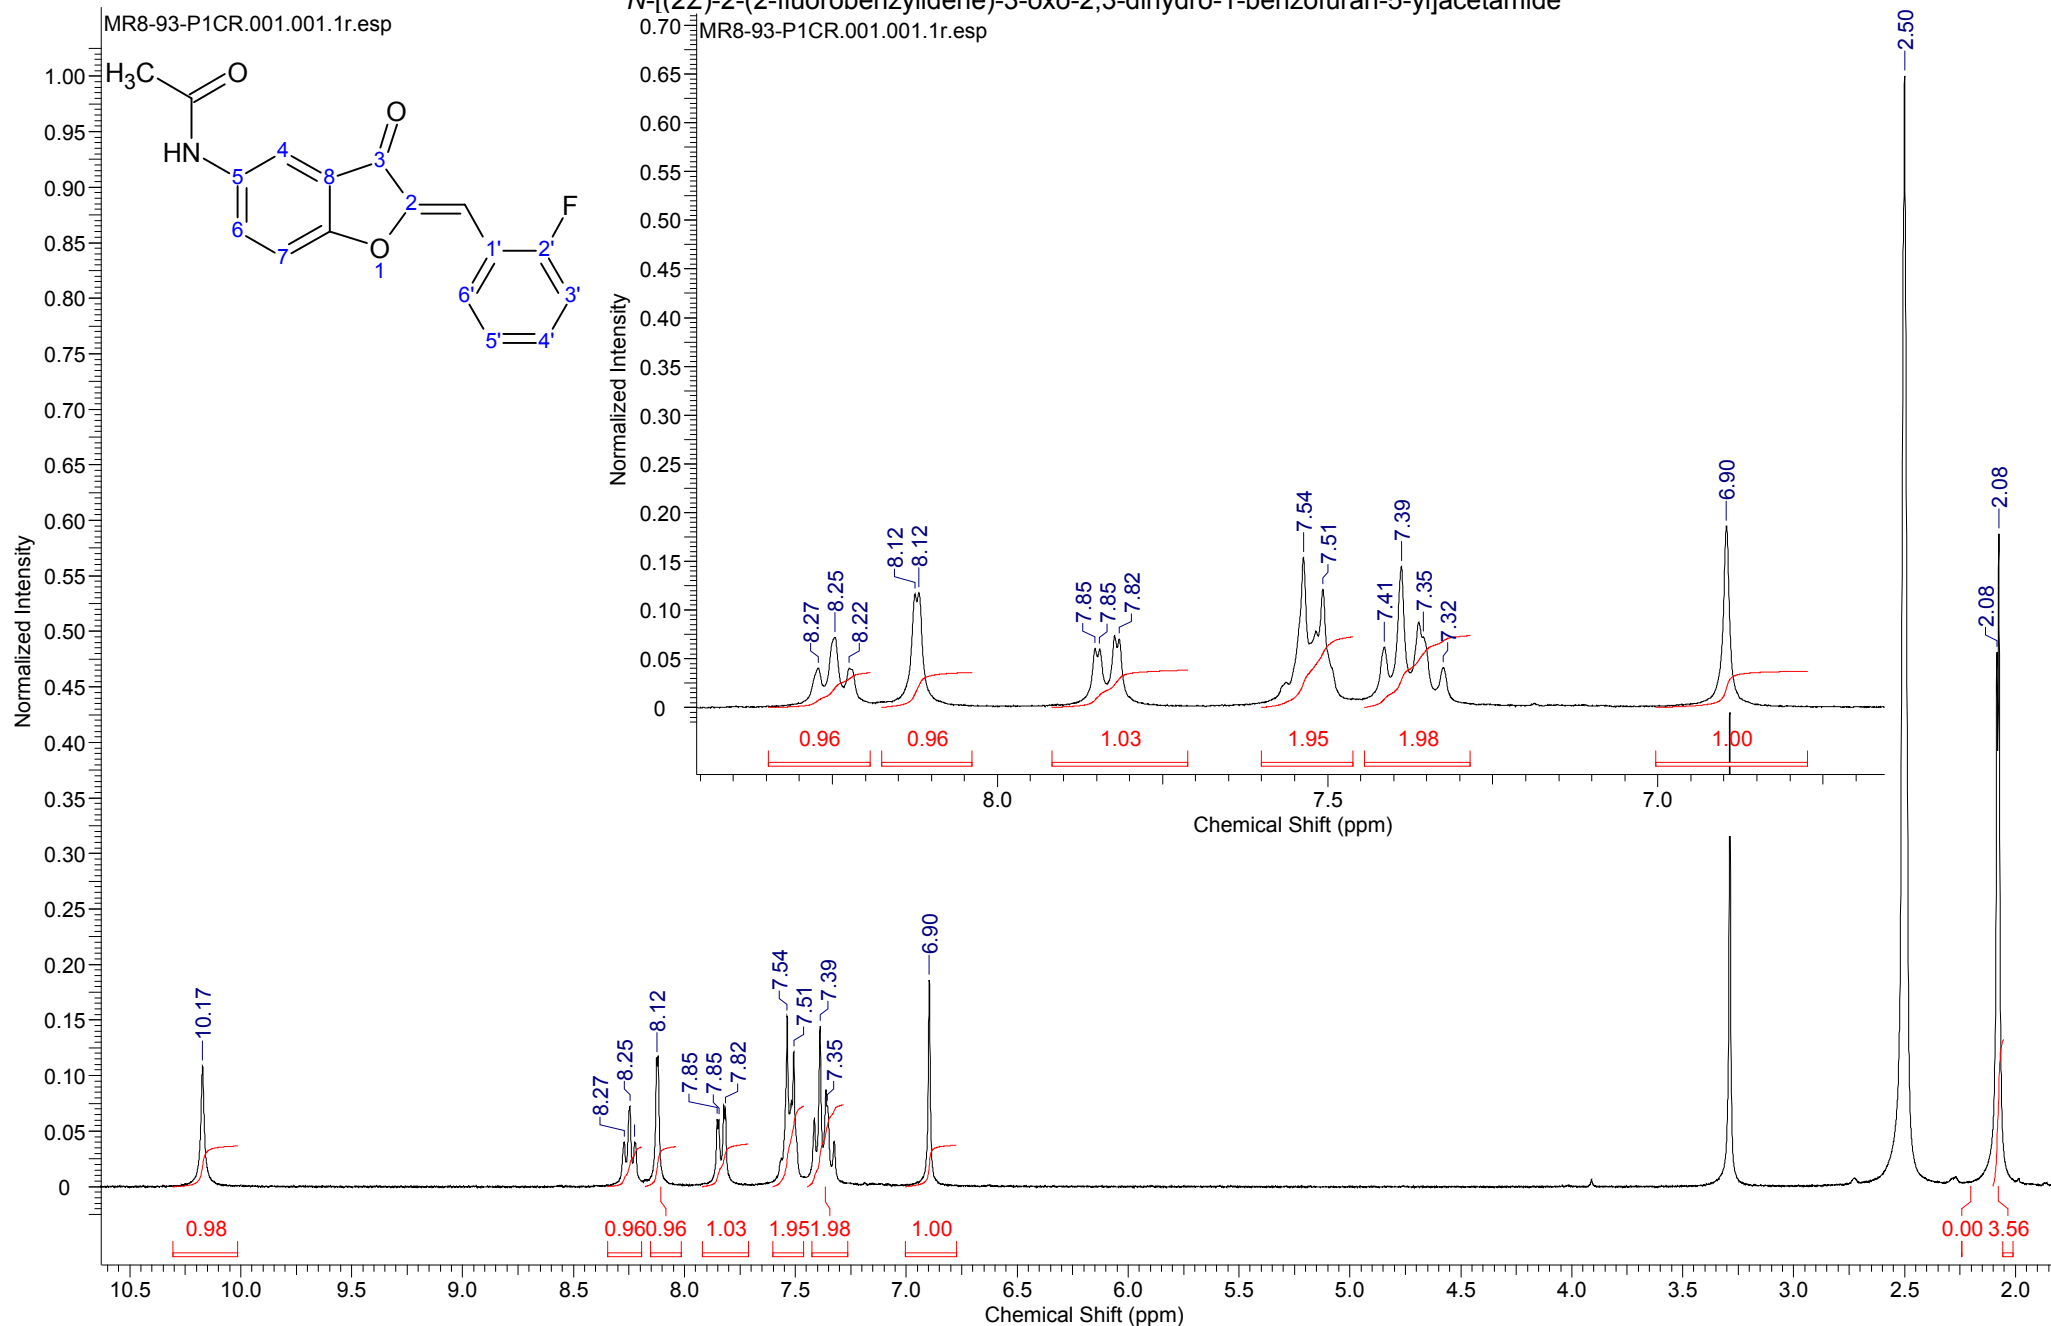

MR8-93-P1CRC.001.001.1r.esp

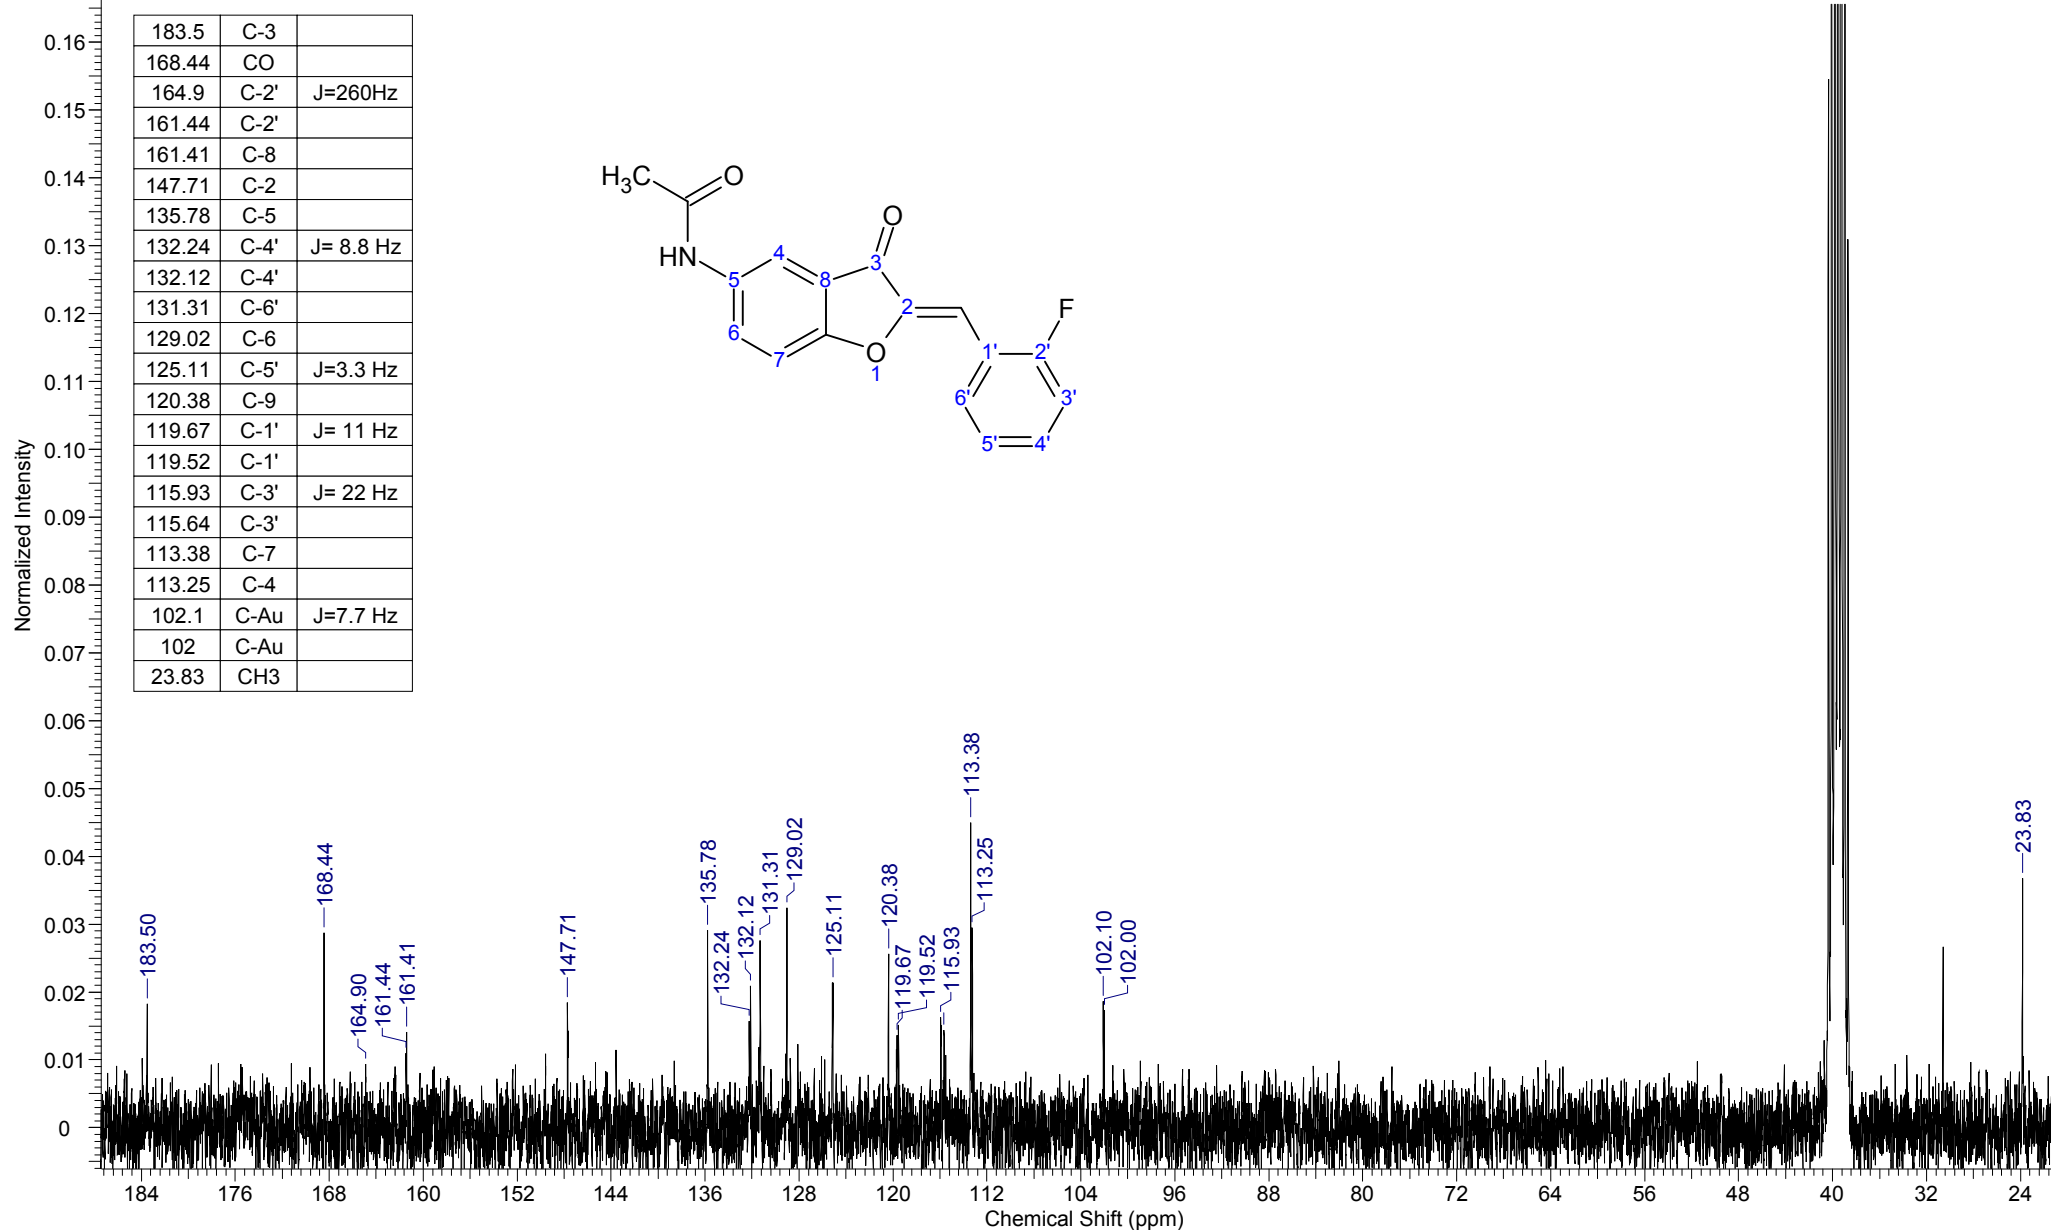

*N*-[(2*Z*)-2-(3-fluorobenzylidene)-3-oxo-2,3-dihydro-1-benzofuran-5-yl]acetamide

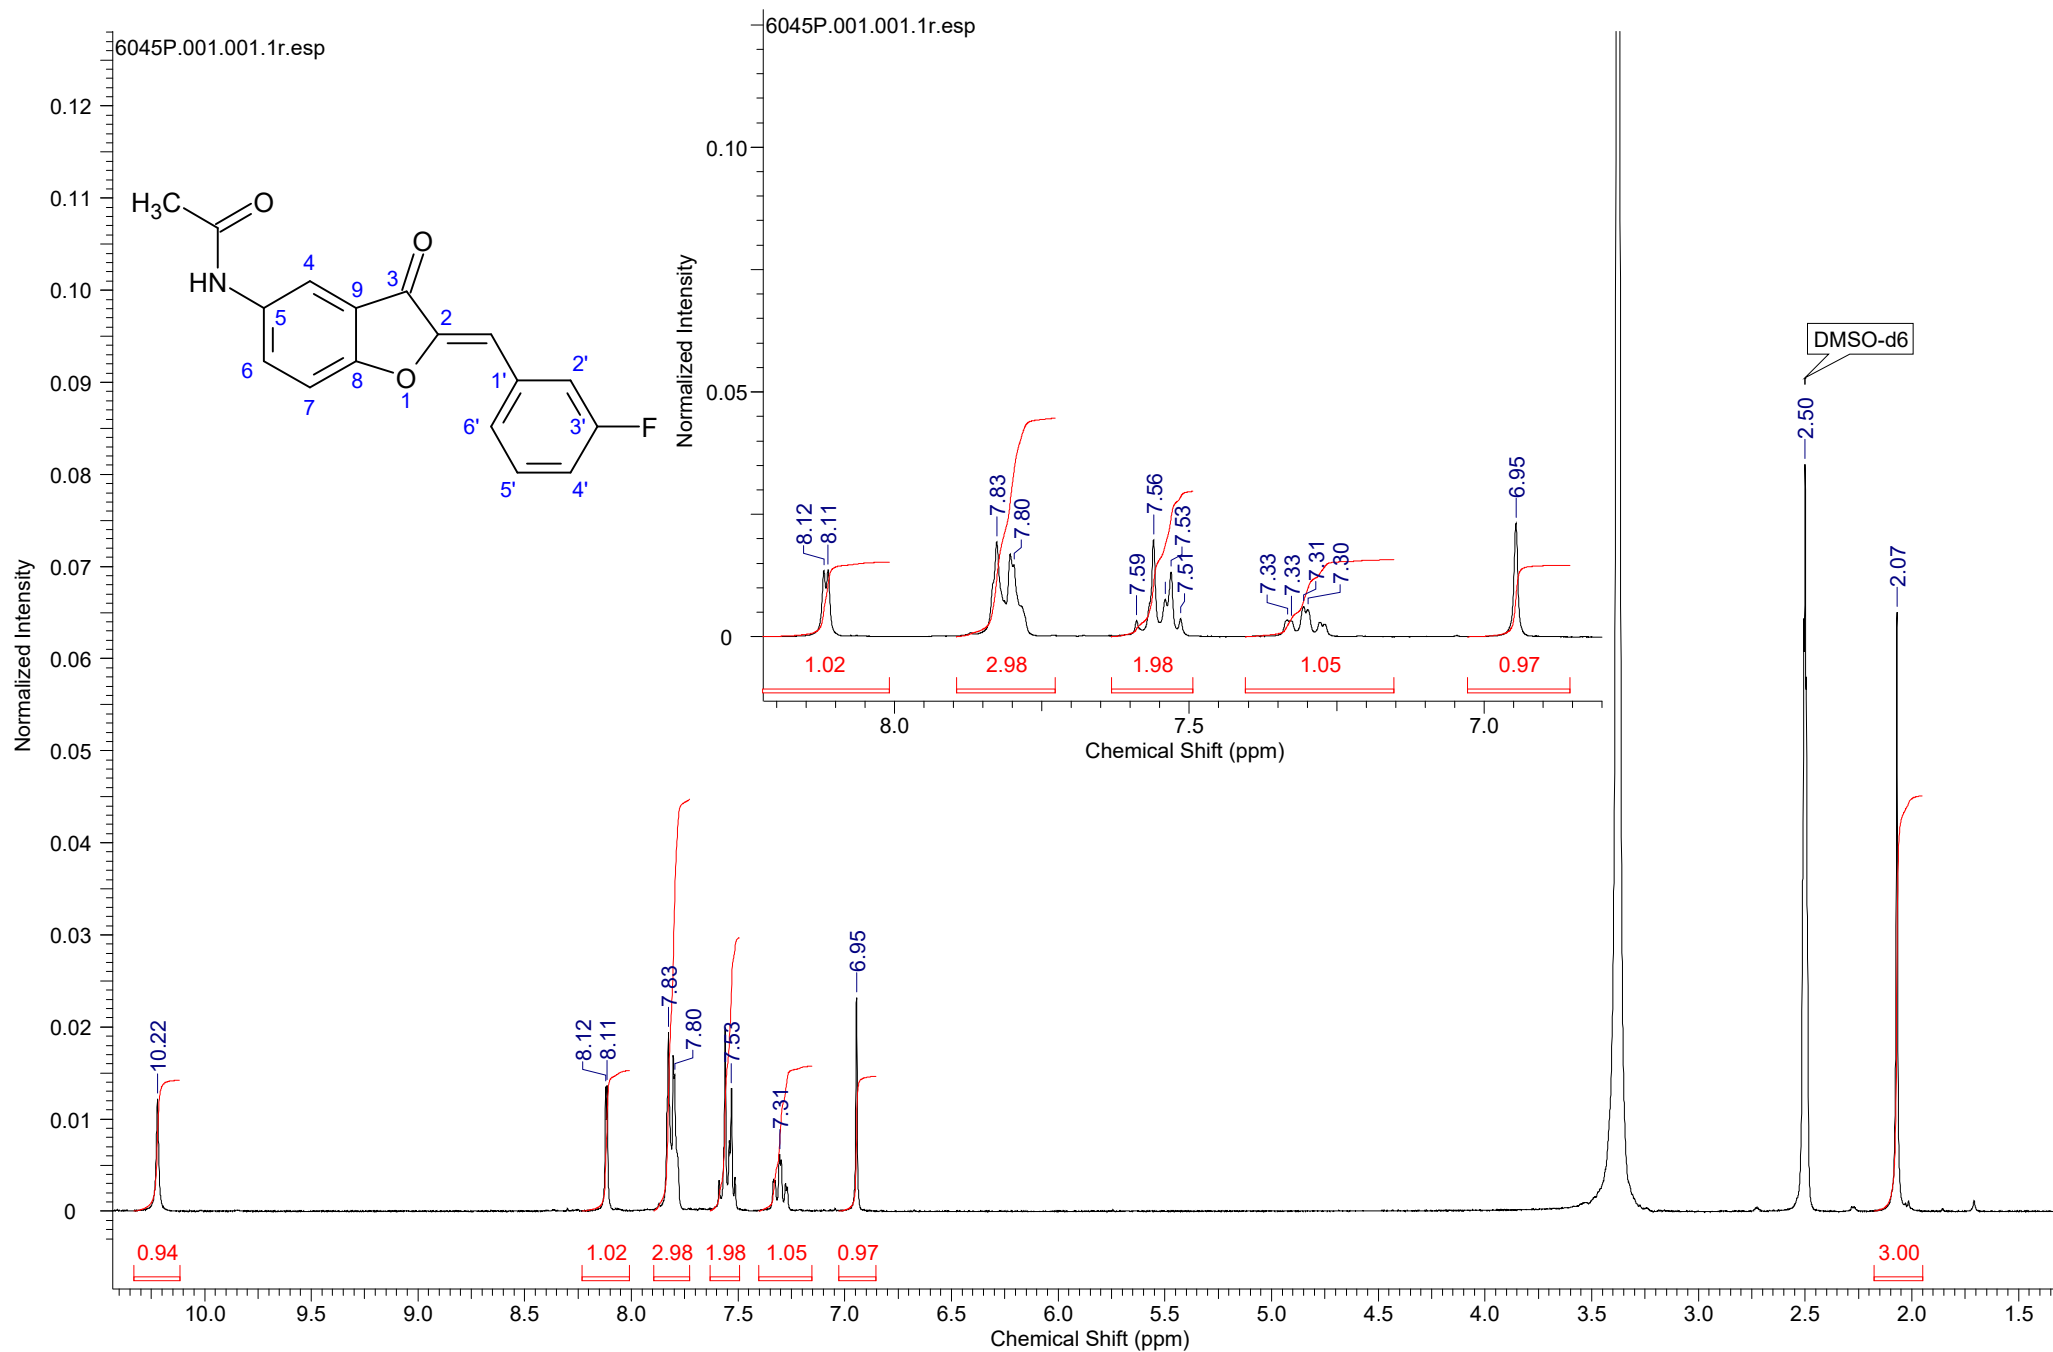

6045PC.001.001.1r.esp

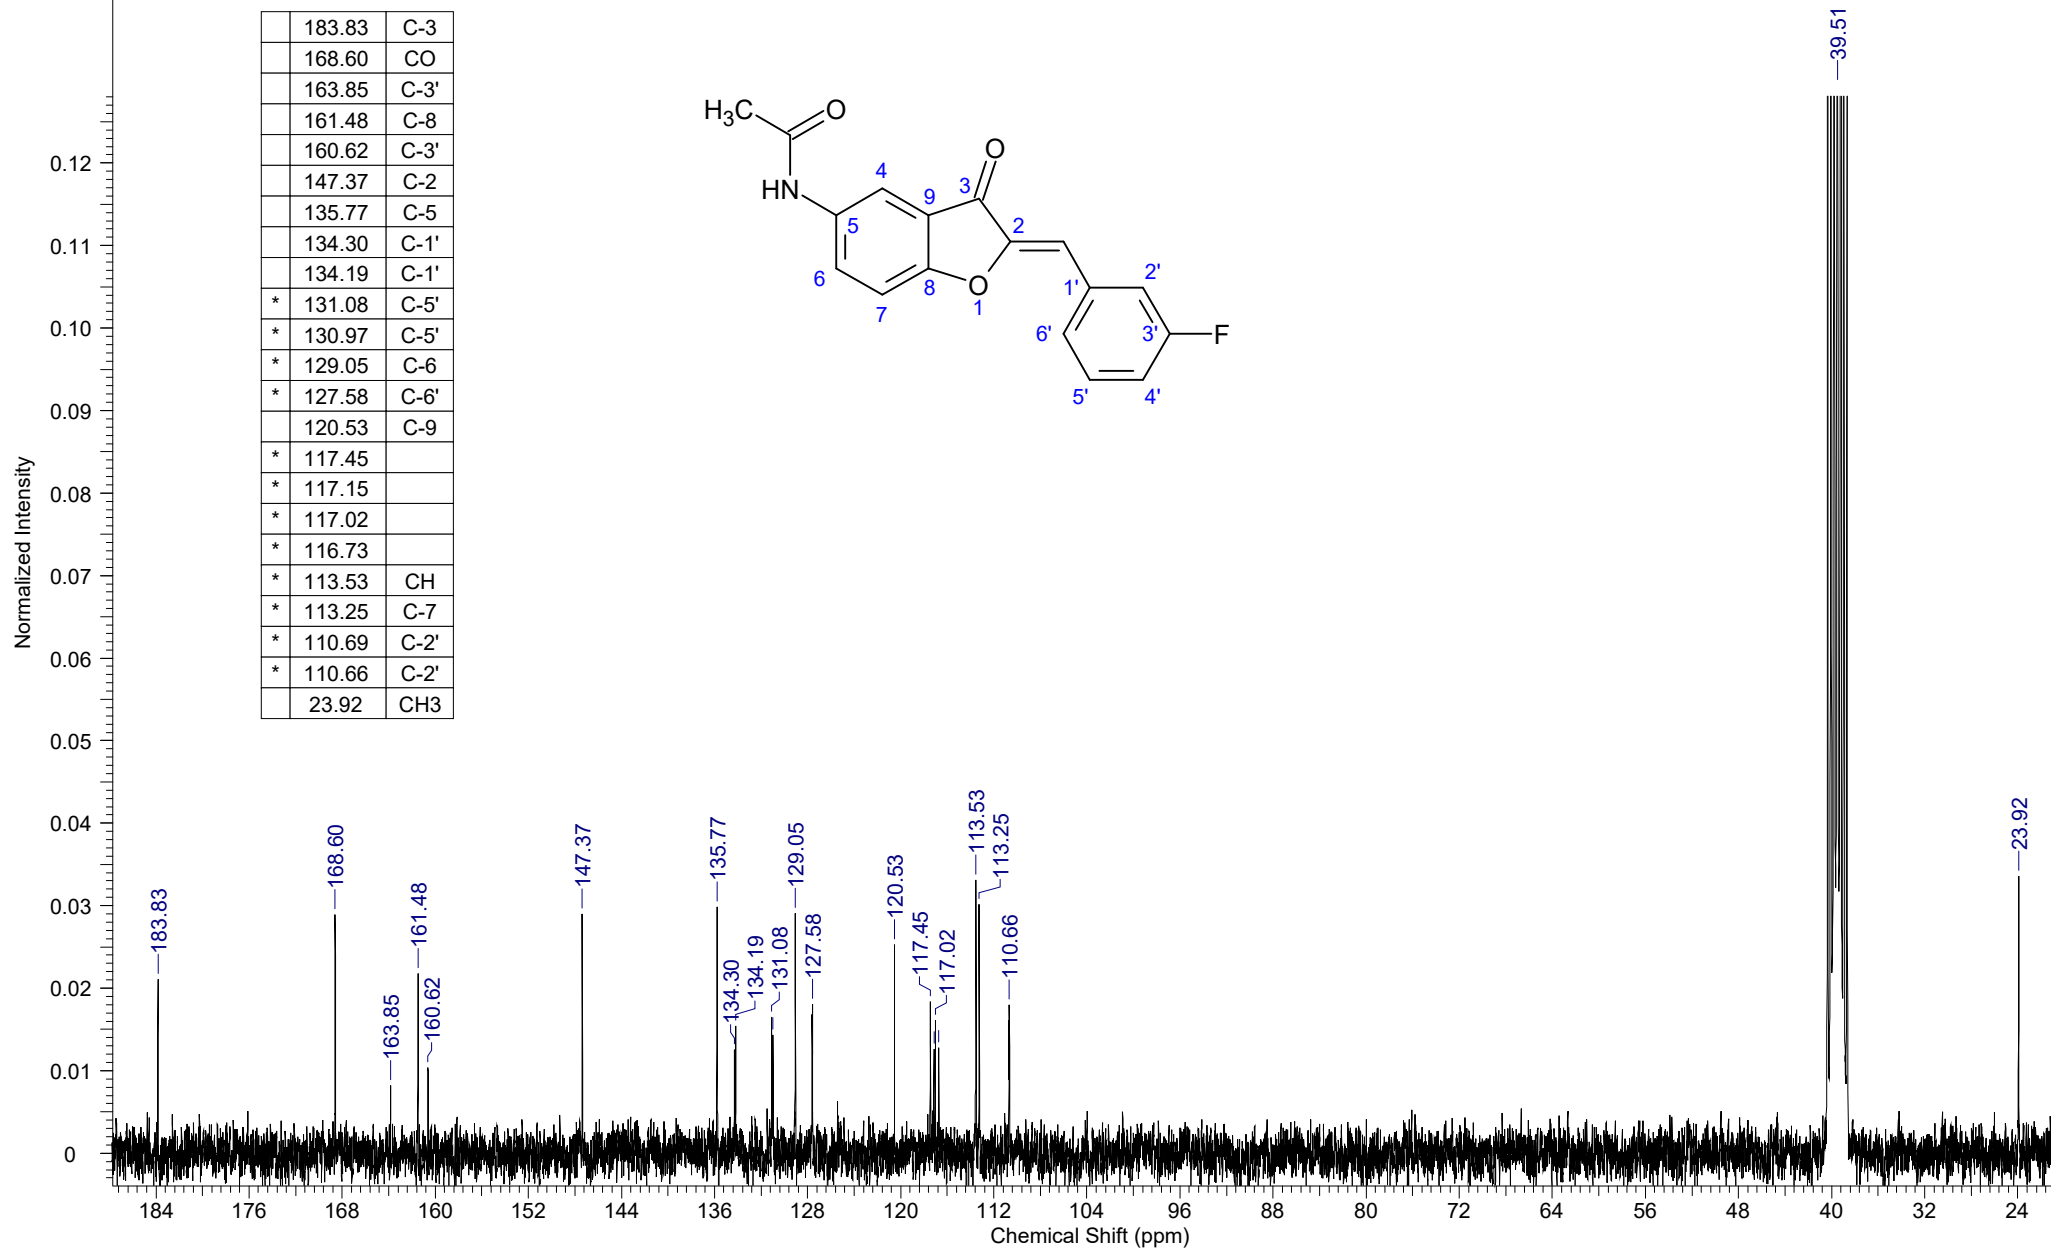

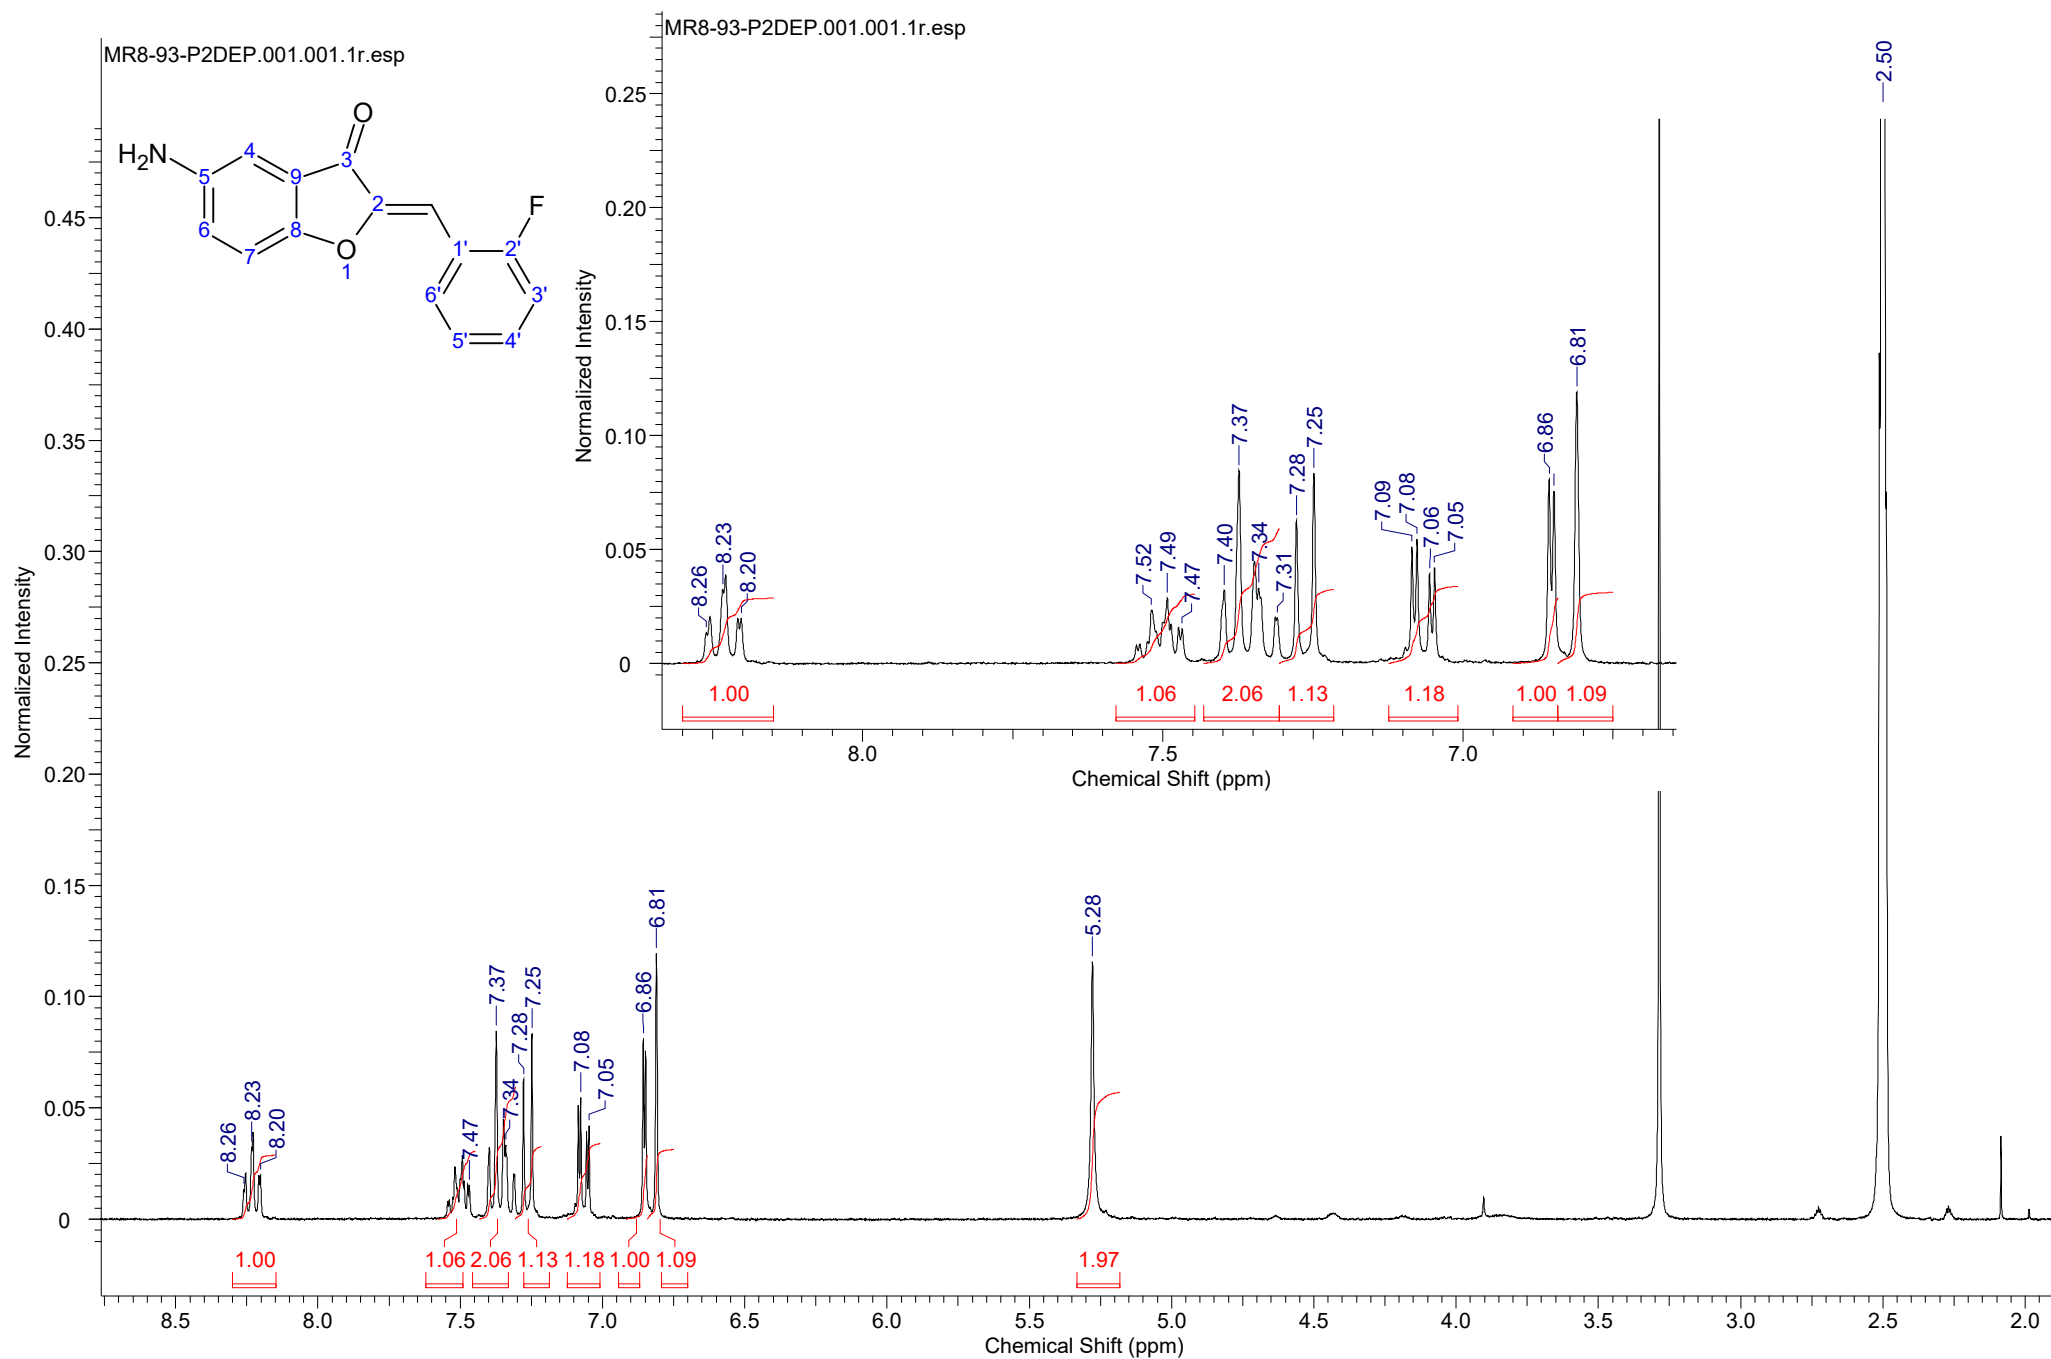

MR1016.001.001.1r.esp

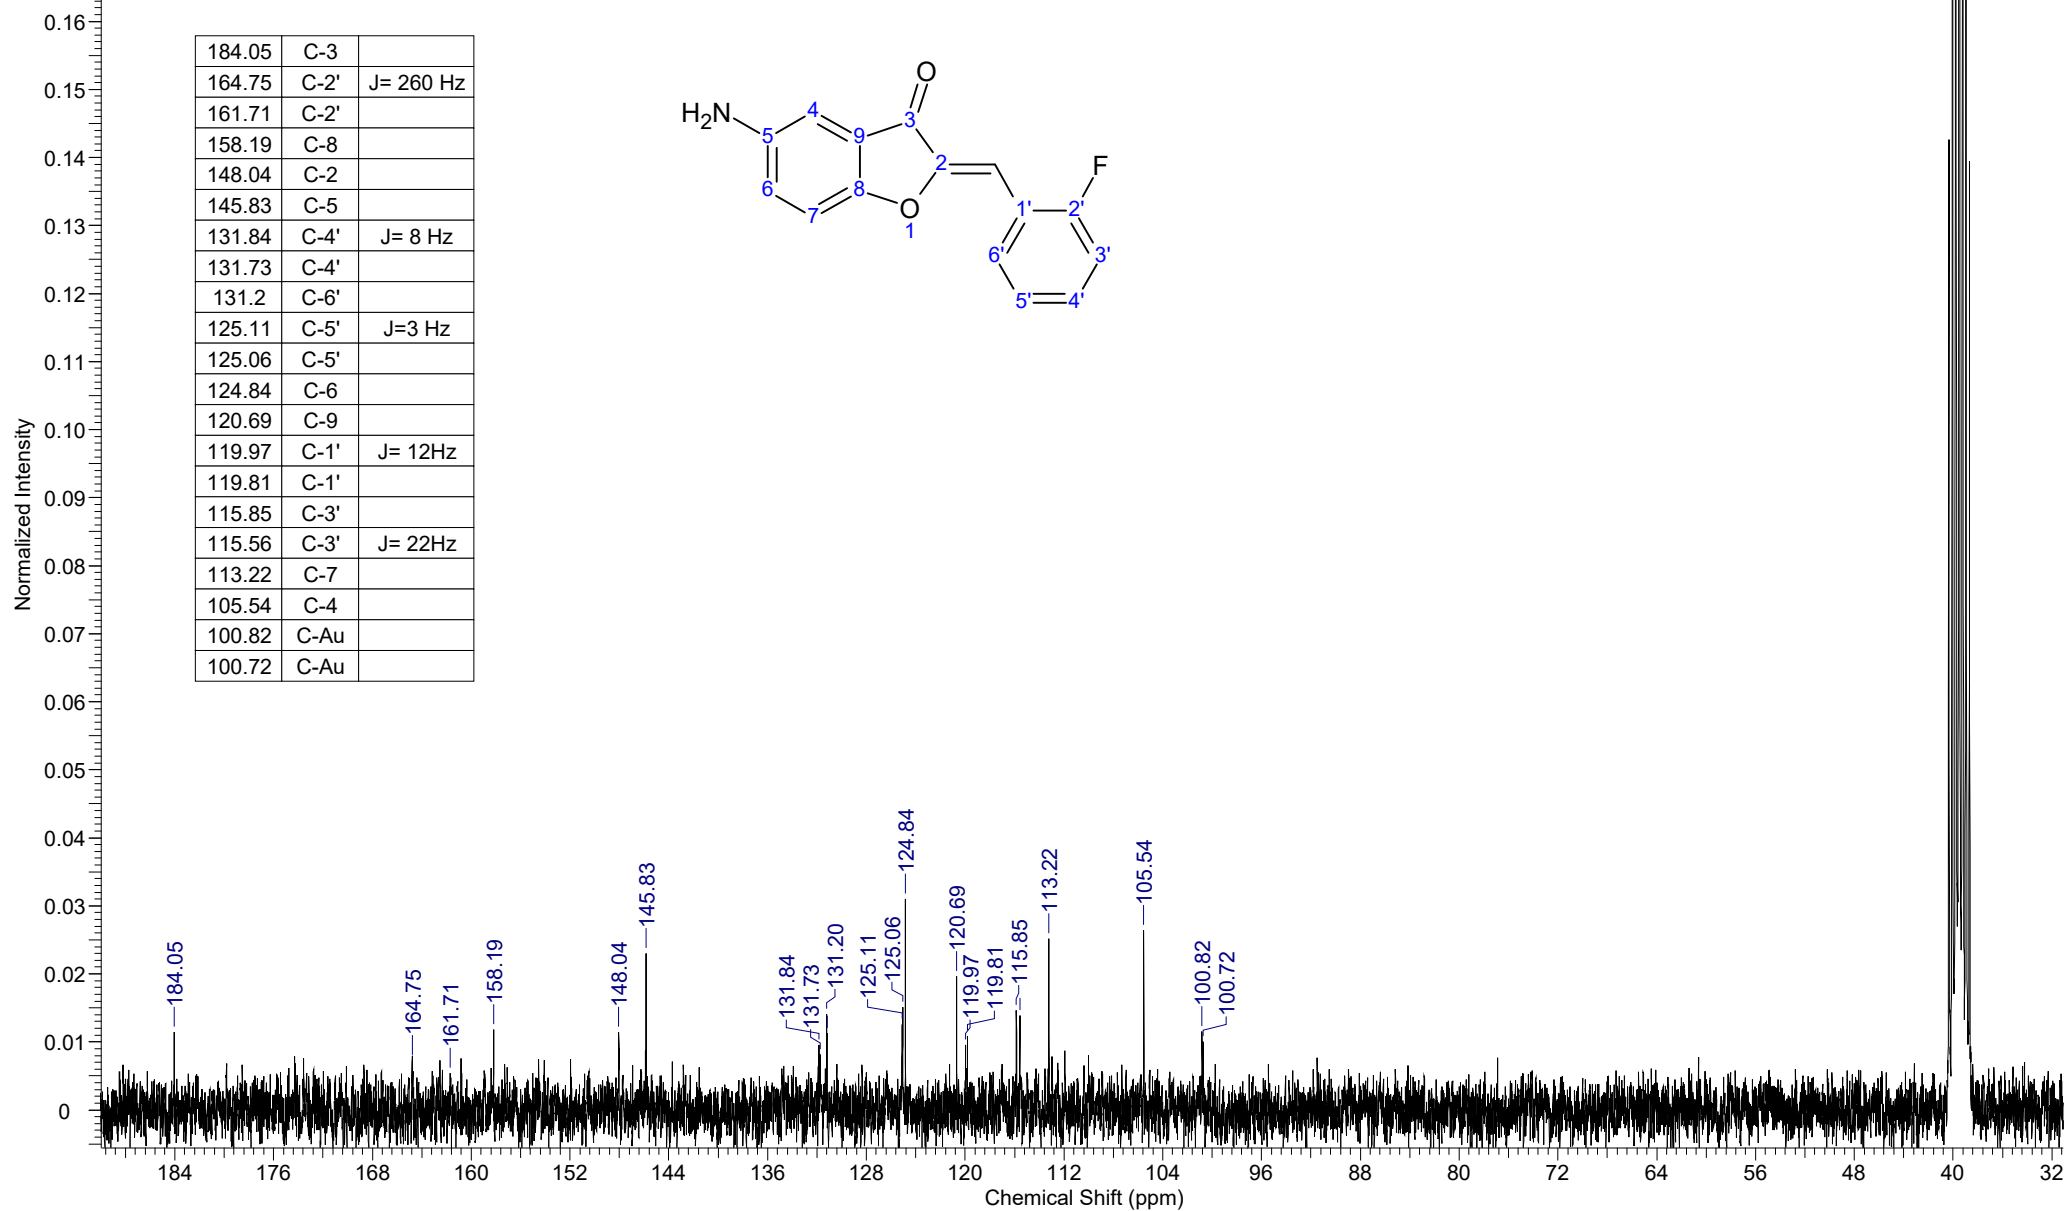

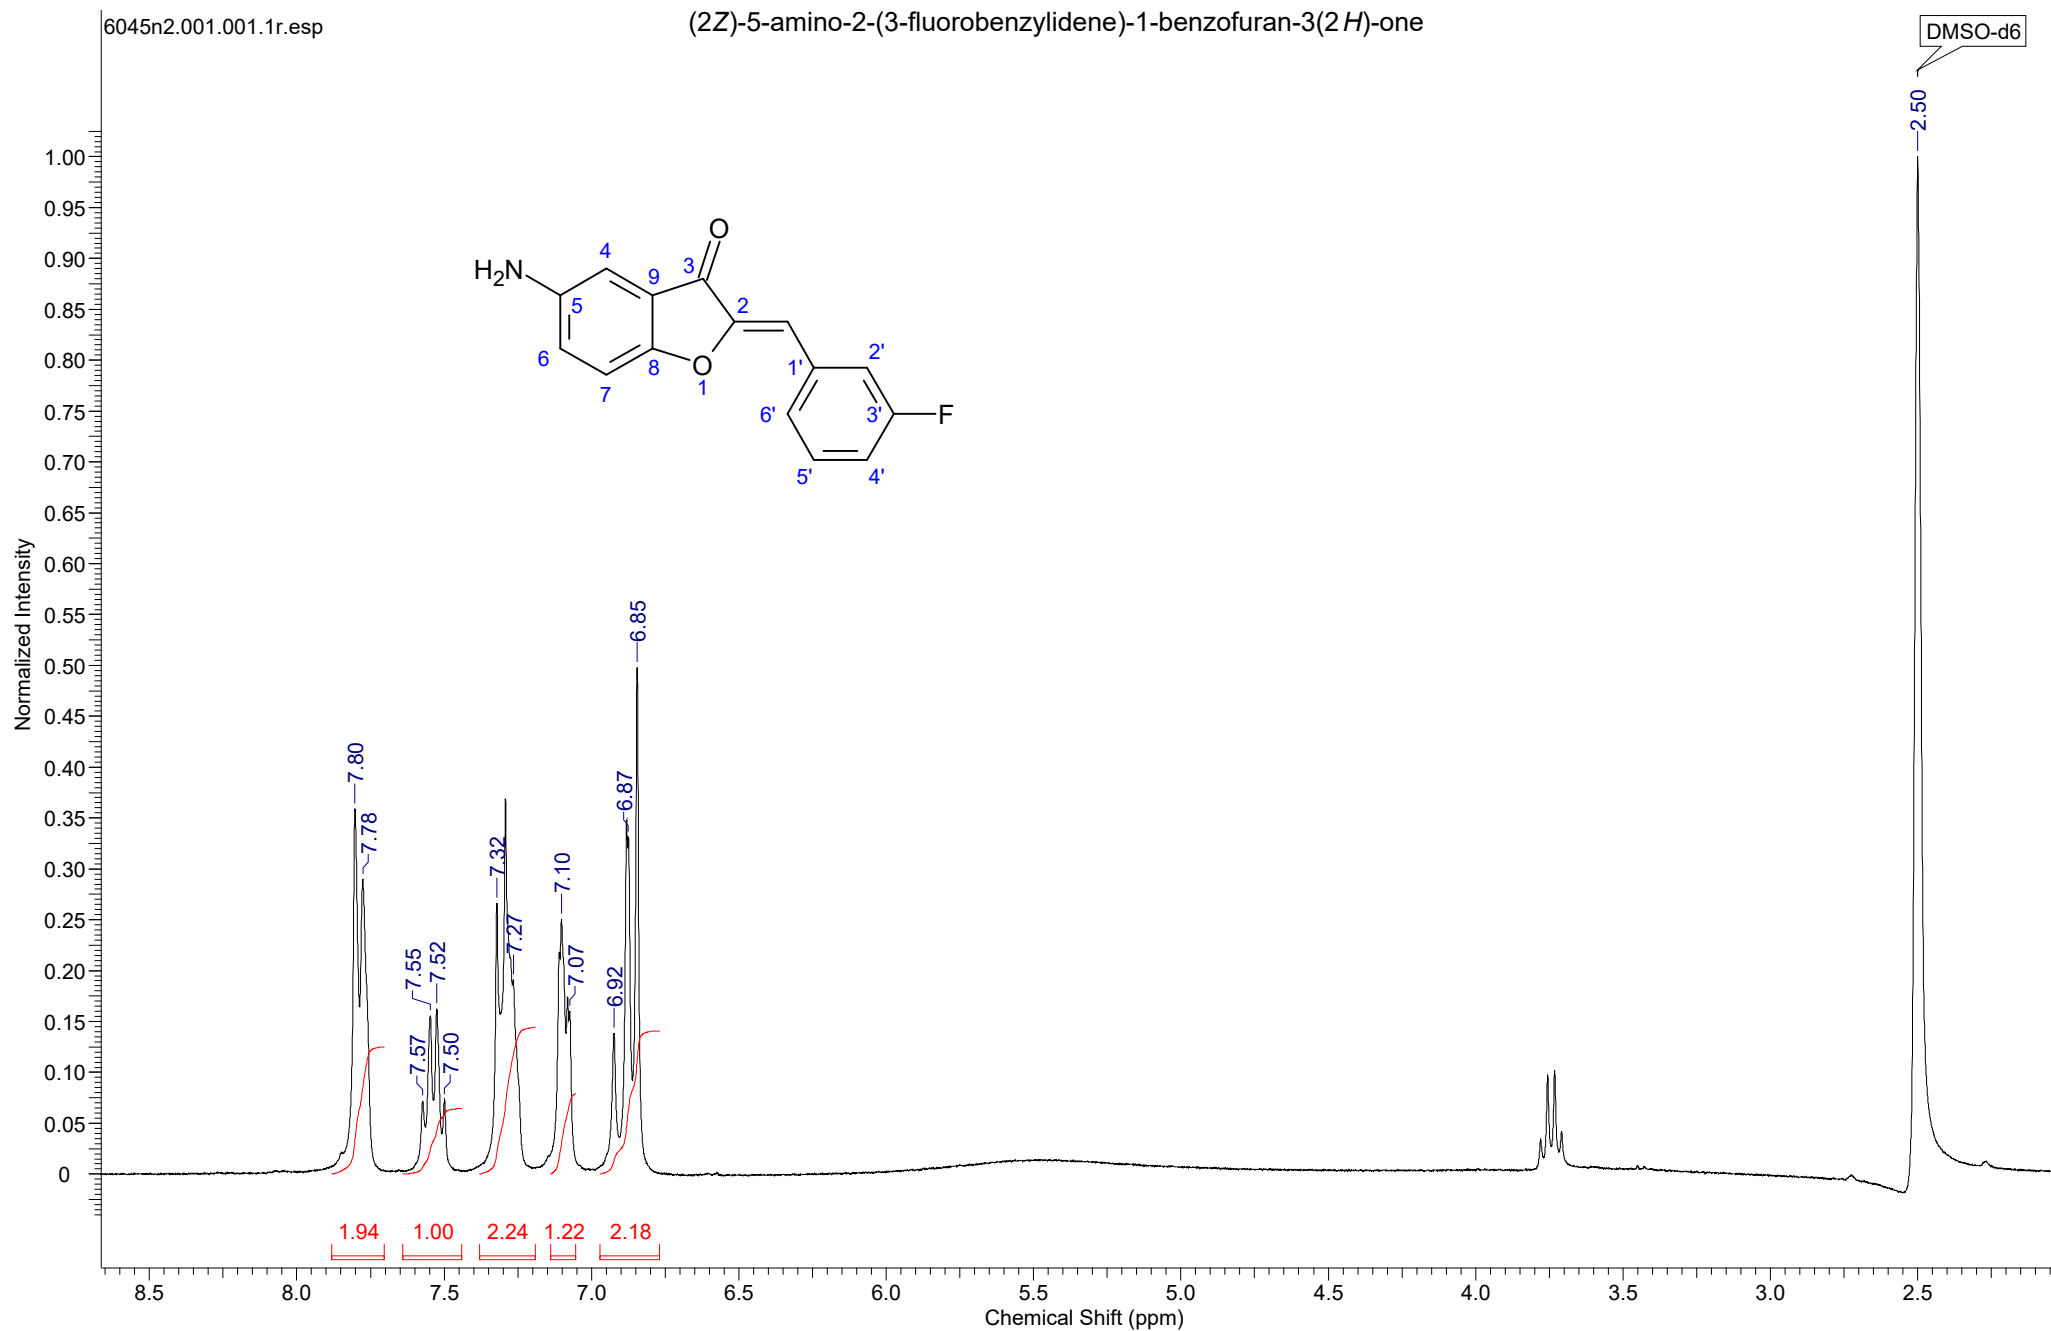



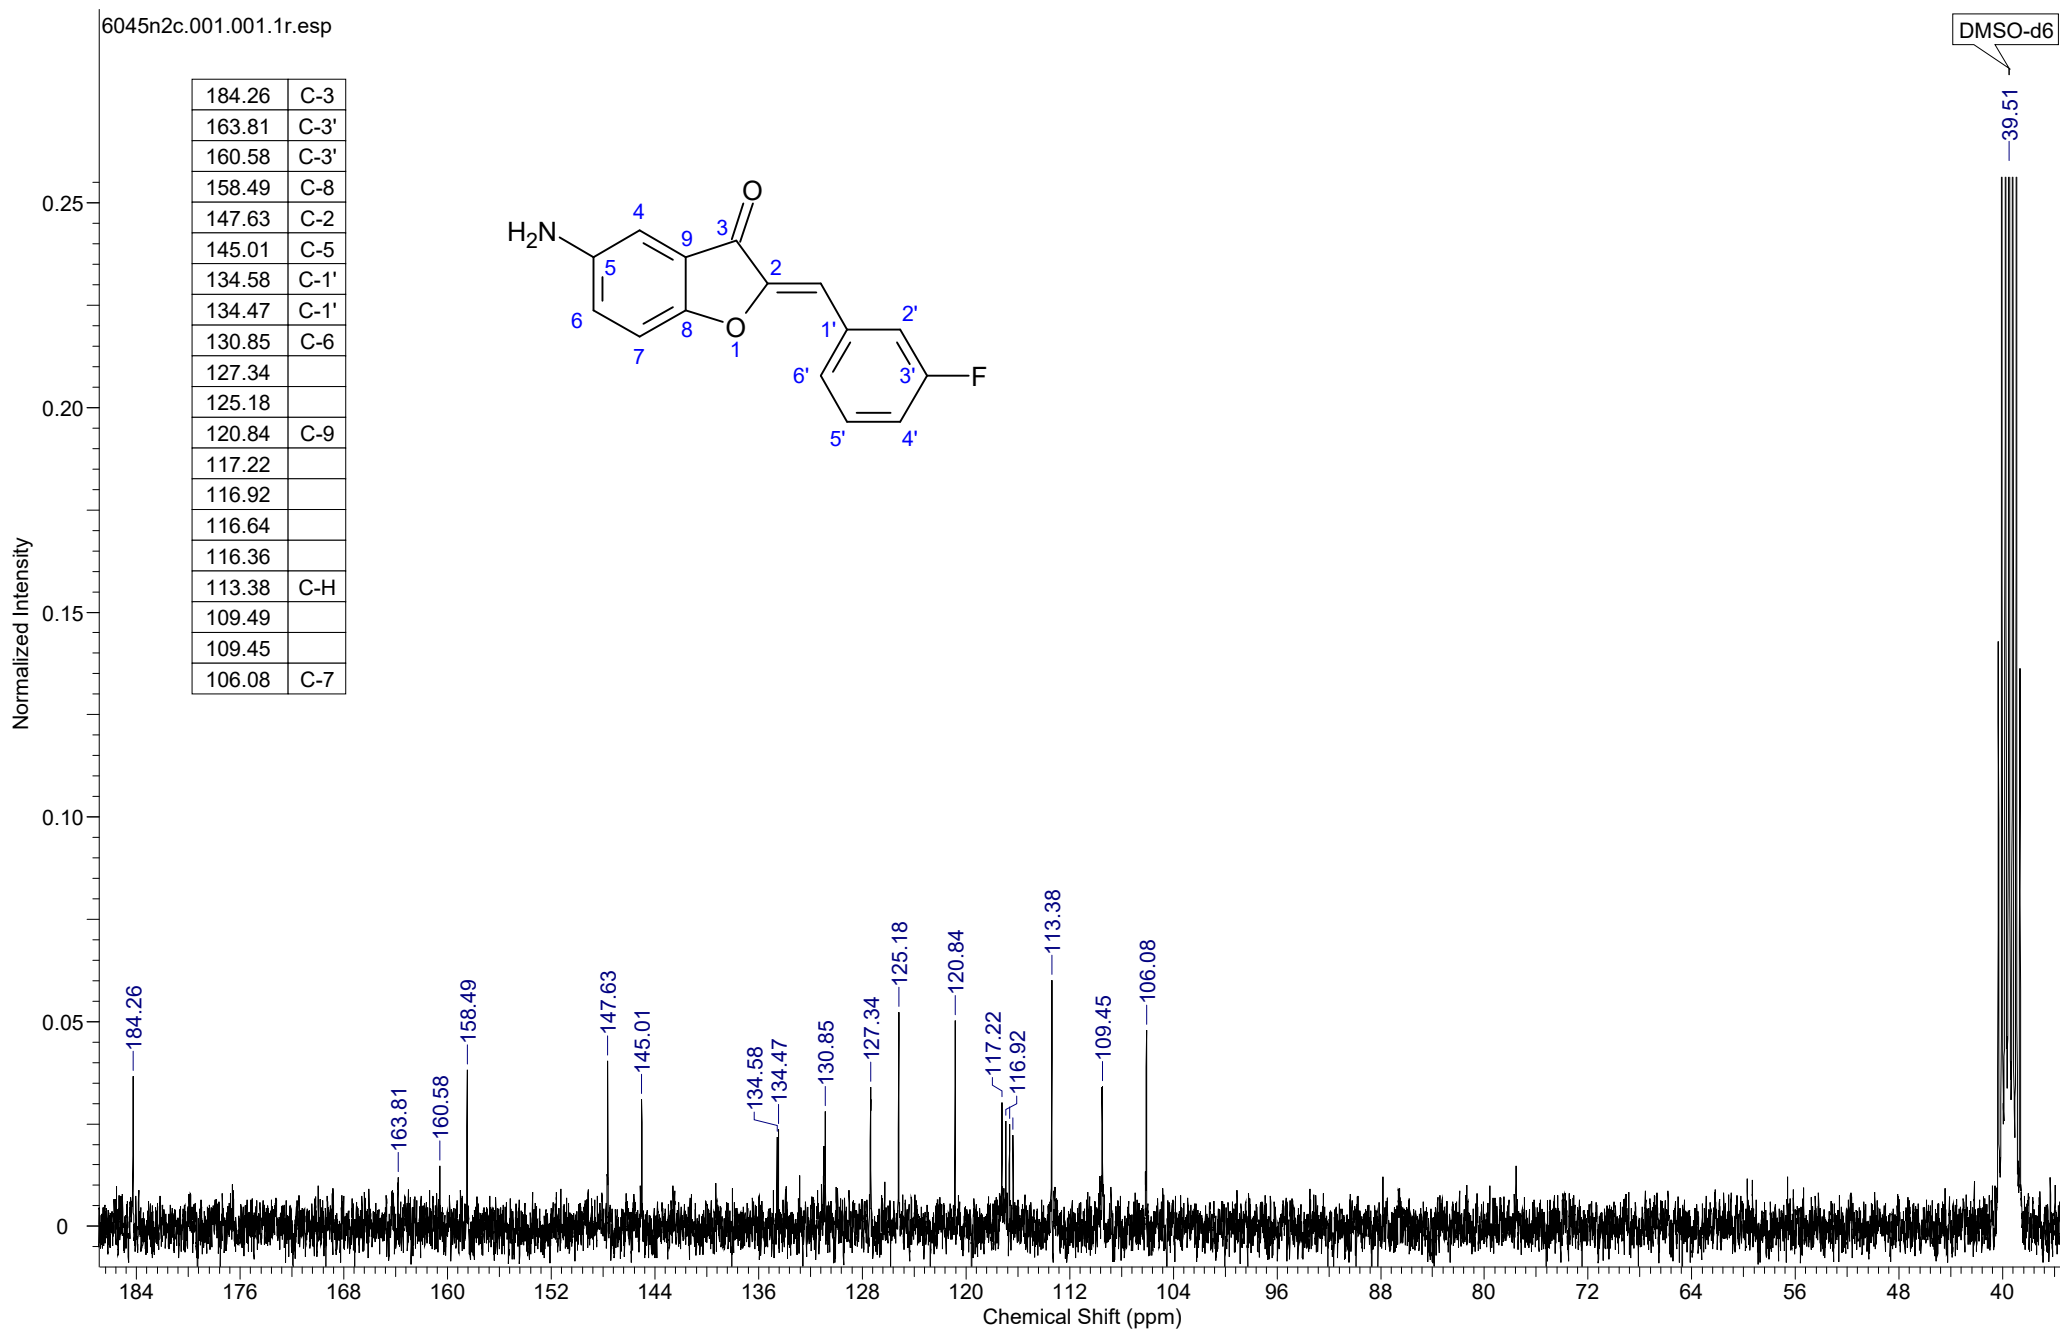

(2Z)-5-amino-2-(4-fluorobenzylidene)-1-benzofuran-3(2H)-one

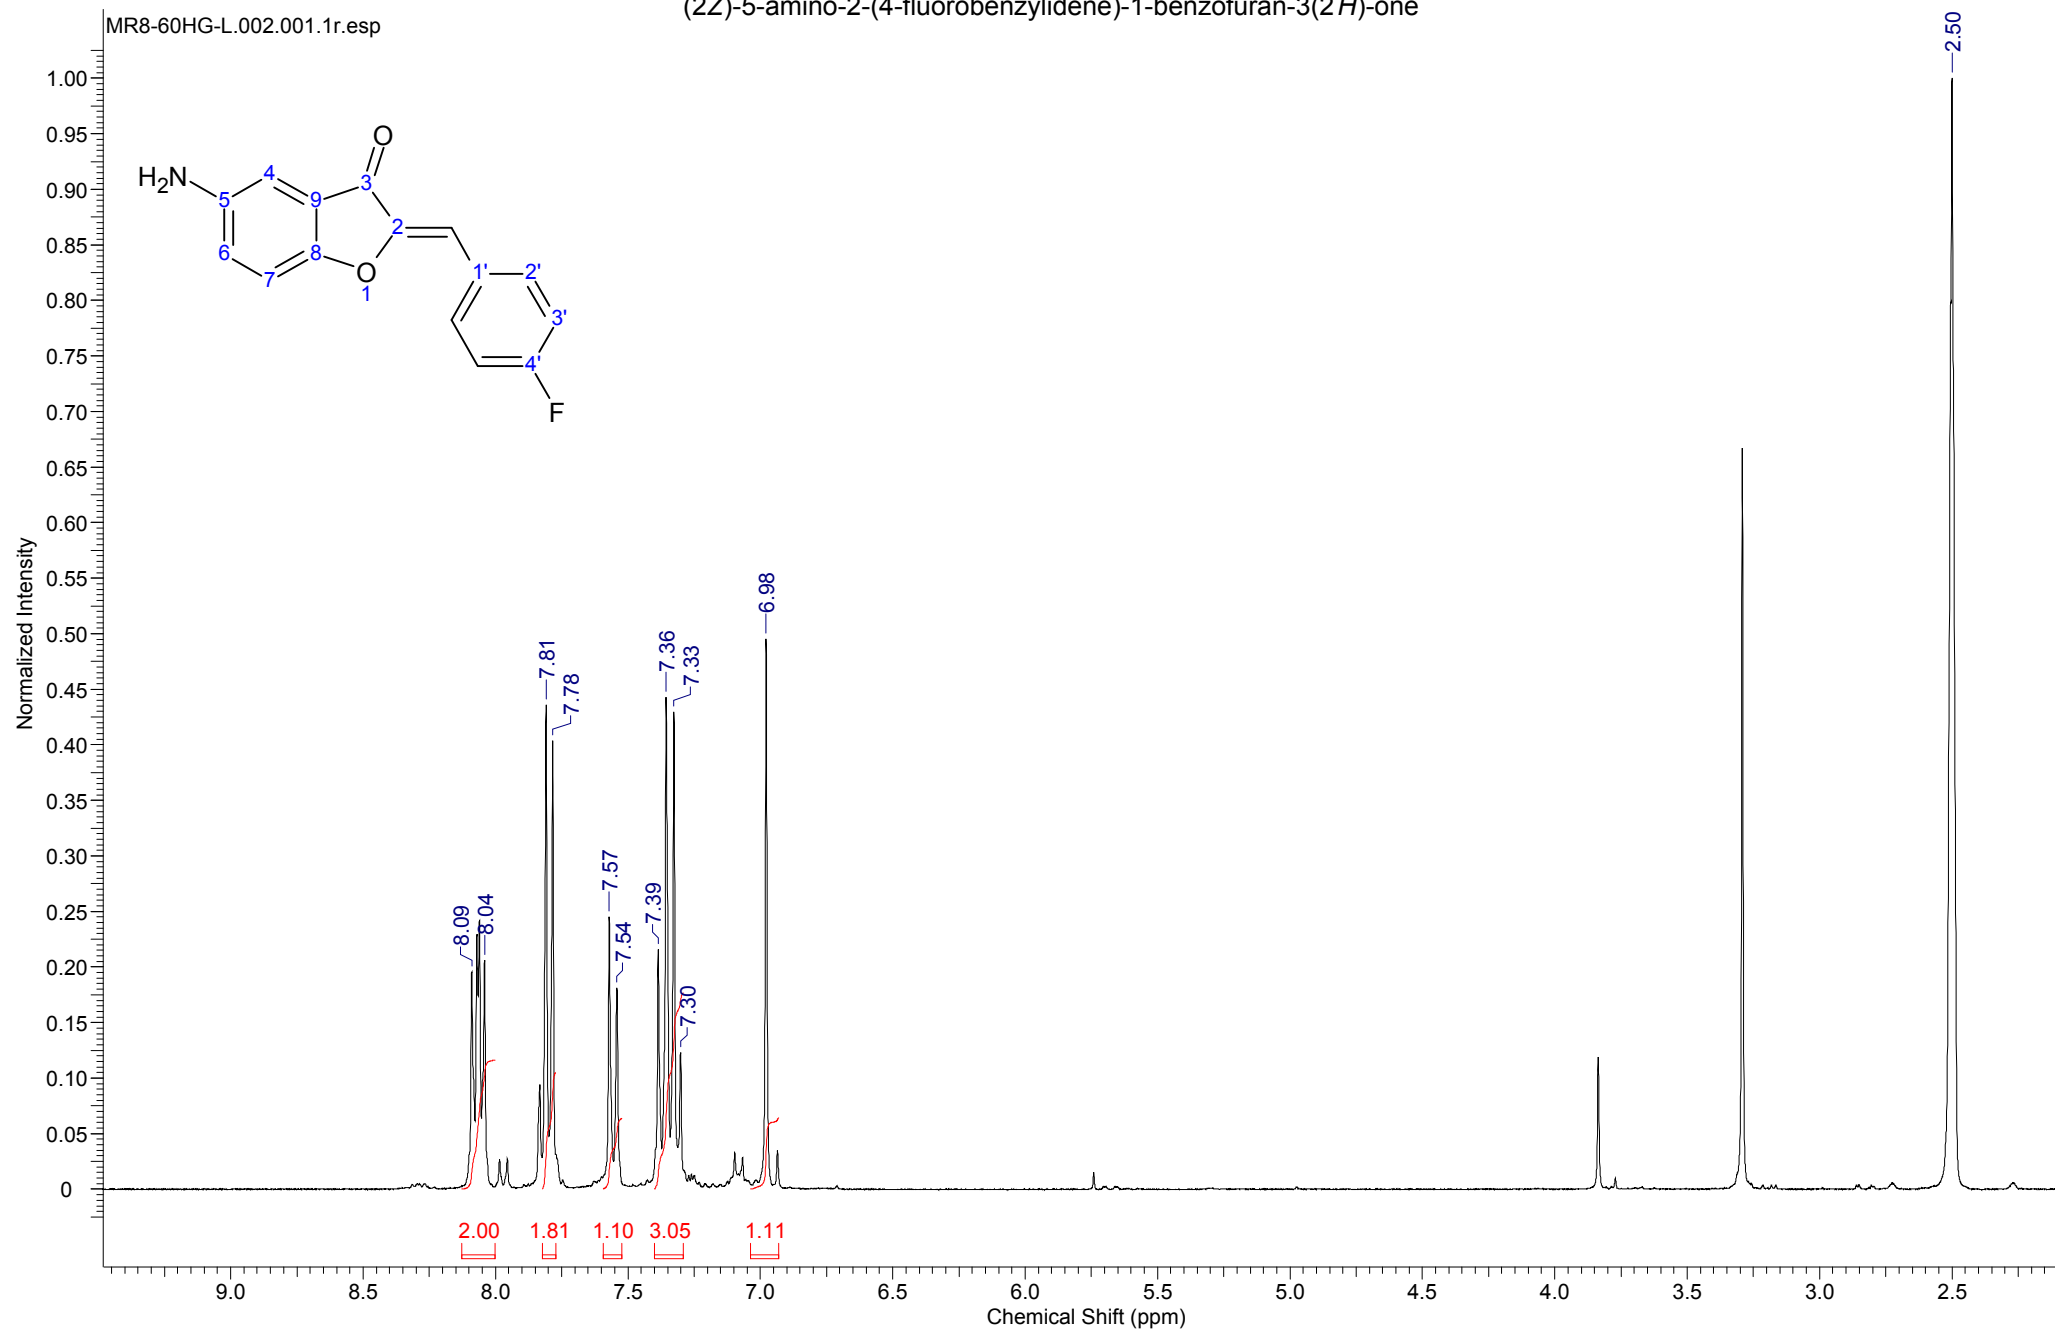

MR8-60HG-L.001.001.1r.esp

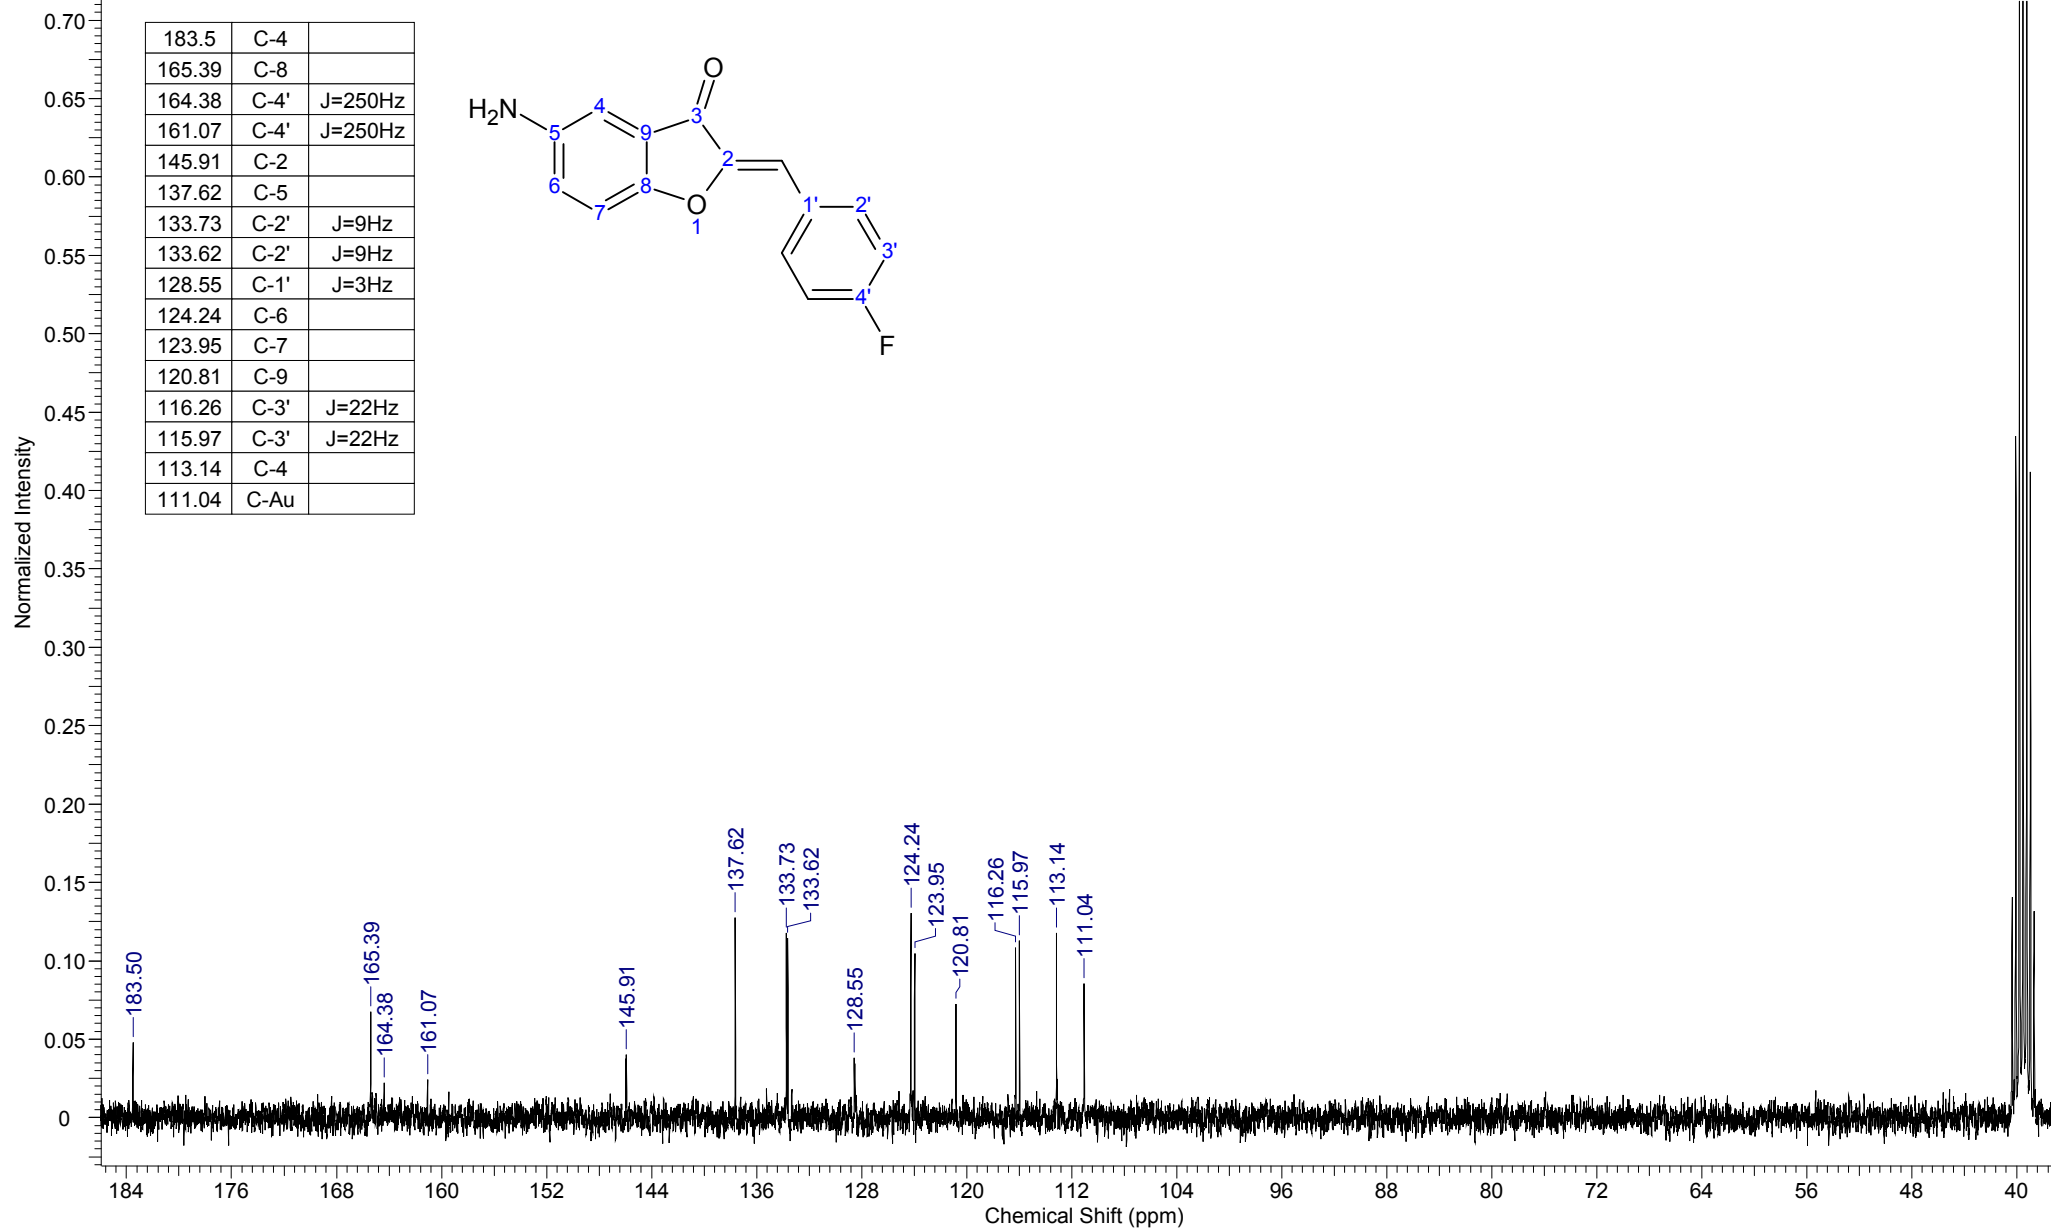

*N*-{(2*Z*)-3-oxo-2-[3-(trifluoromethyl)benzylidene]-2,3-dihydro-1-benzofuran-5-yl}acetamide

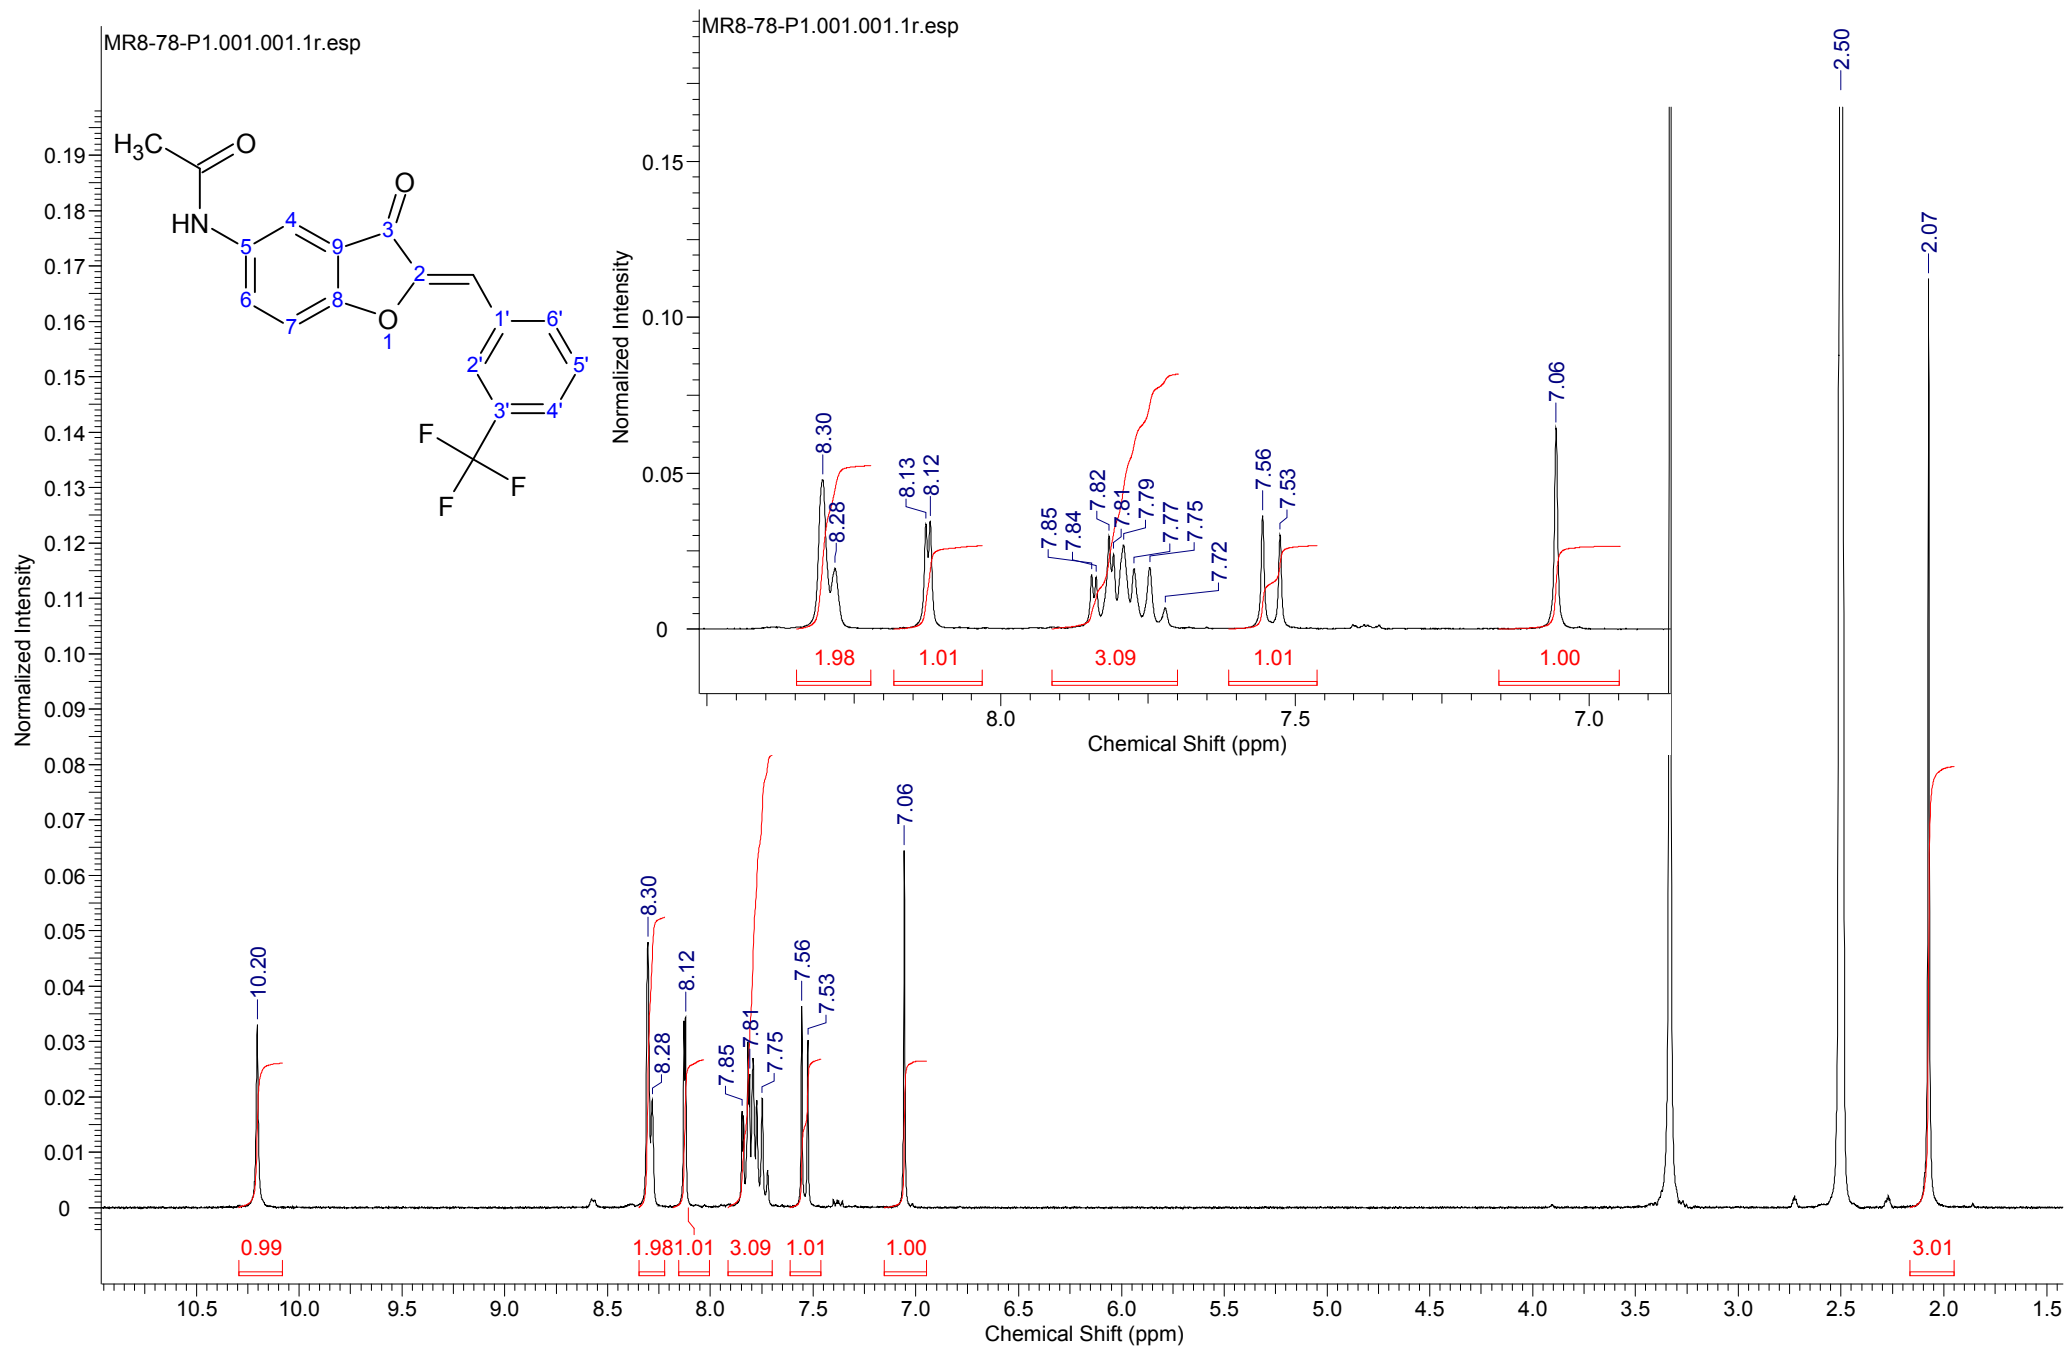

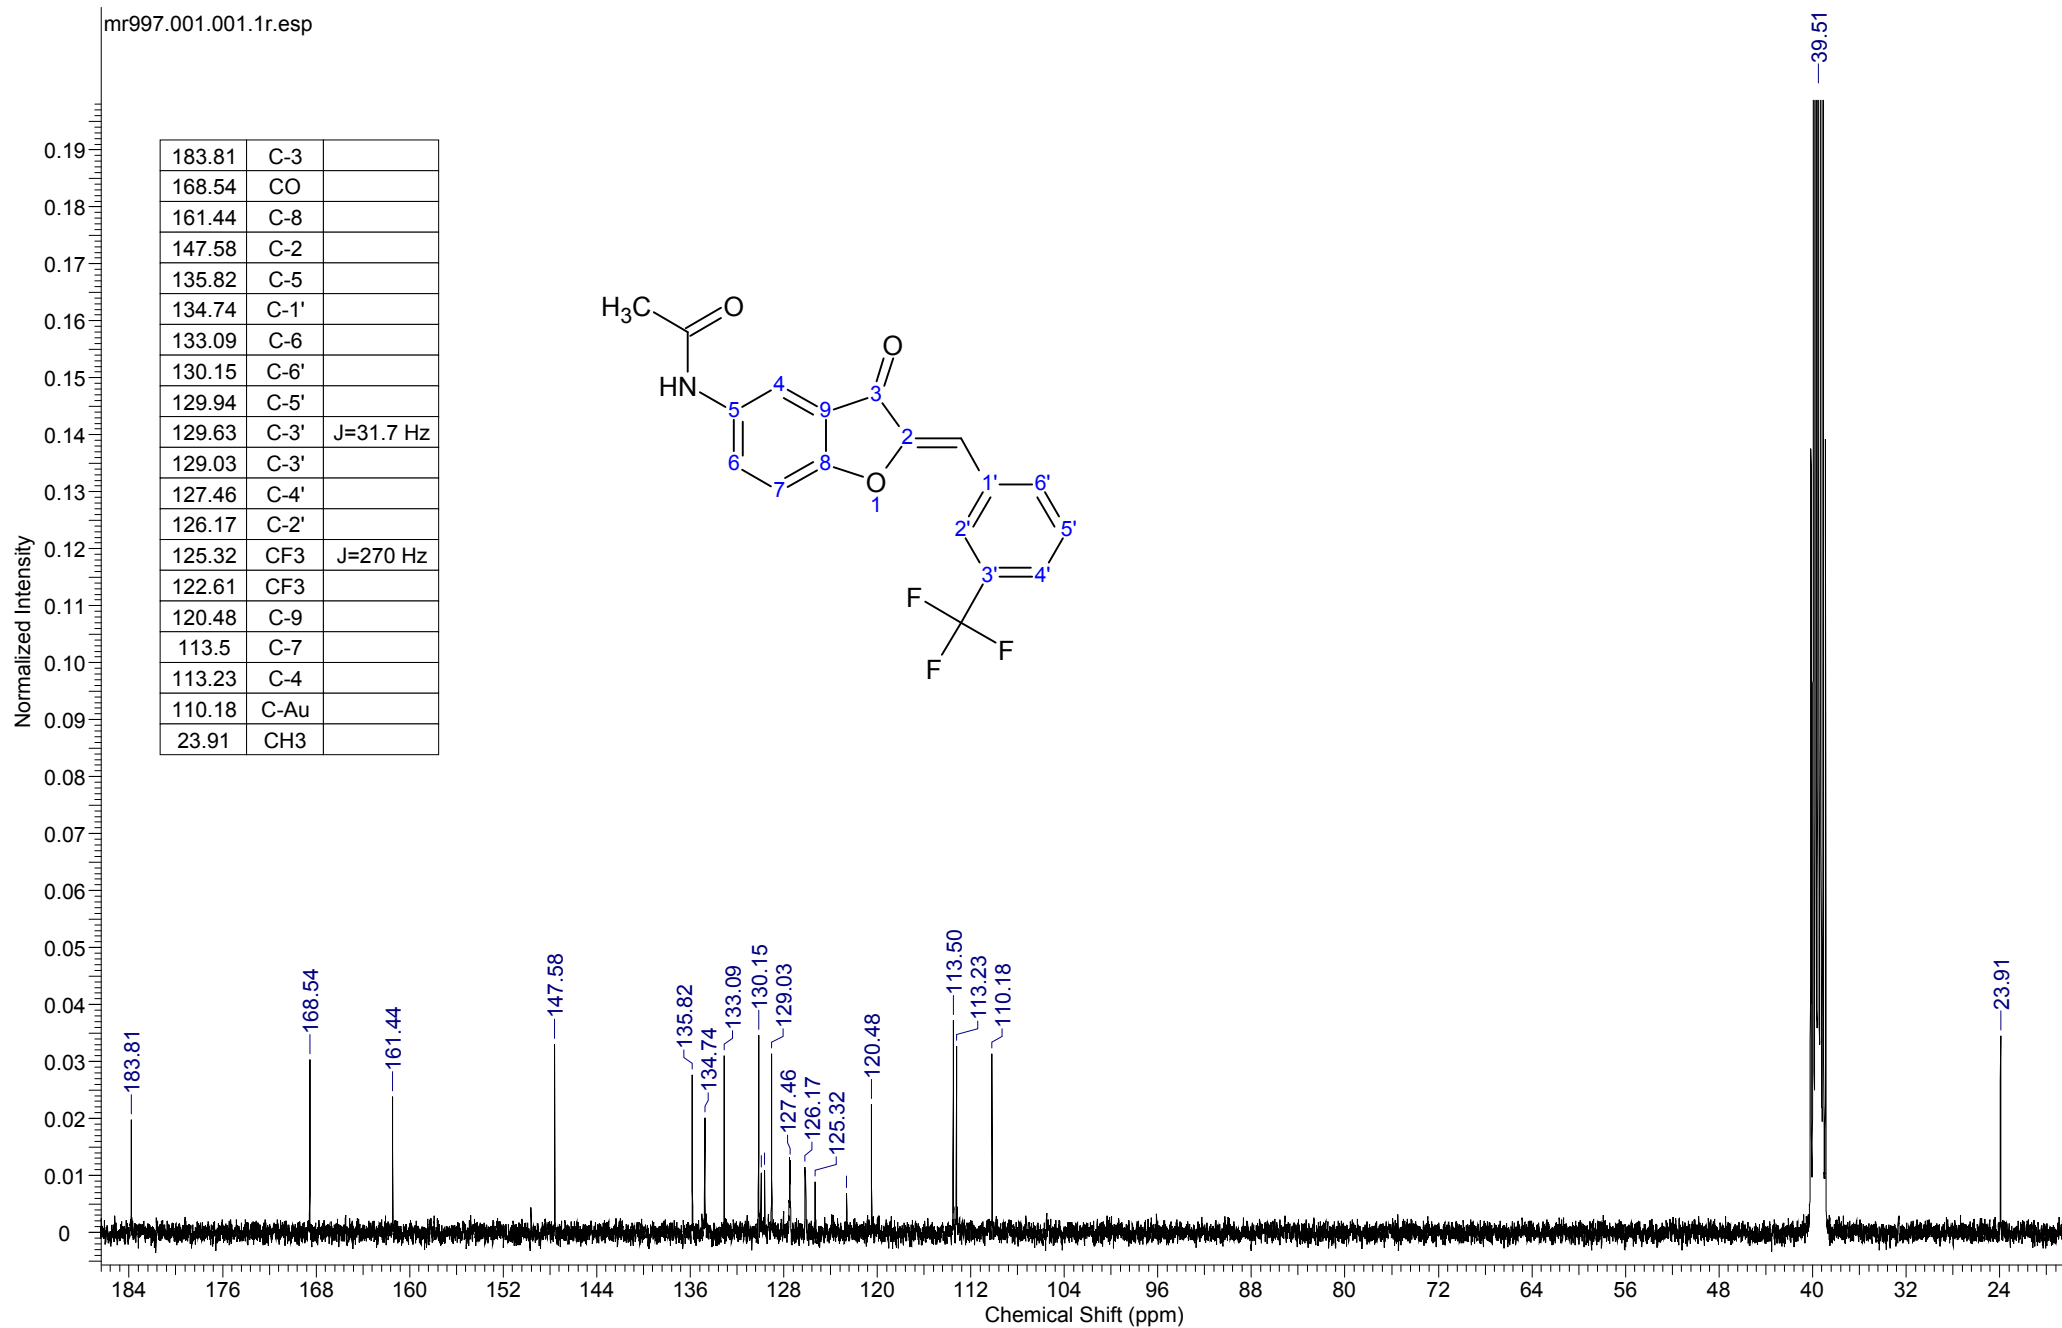

(2Z)-5-amino-2-[3-(trifluoromethyl)benzylidene]-1-benzofuran-3(2H)-one

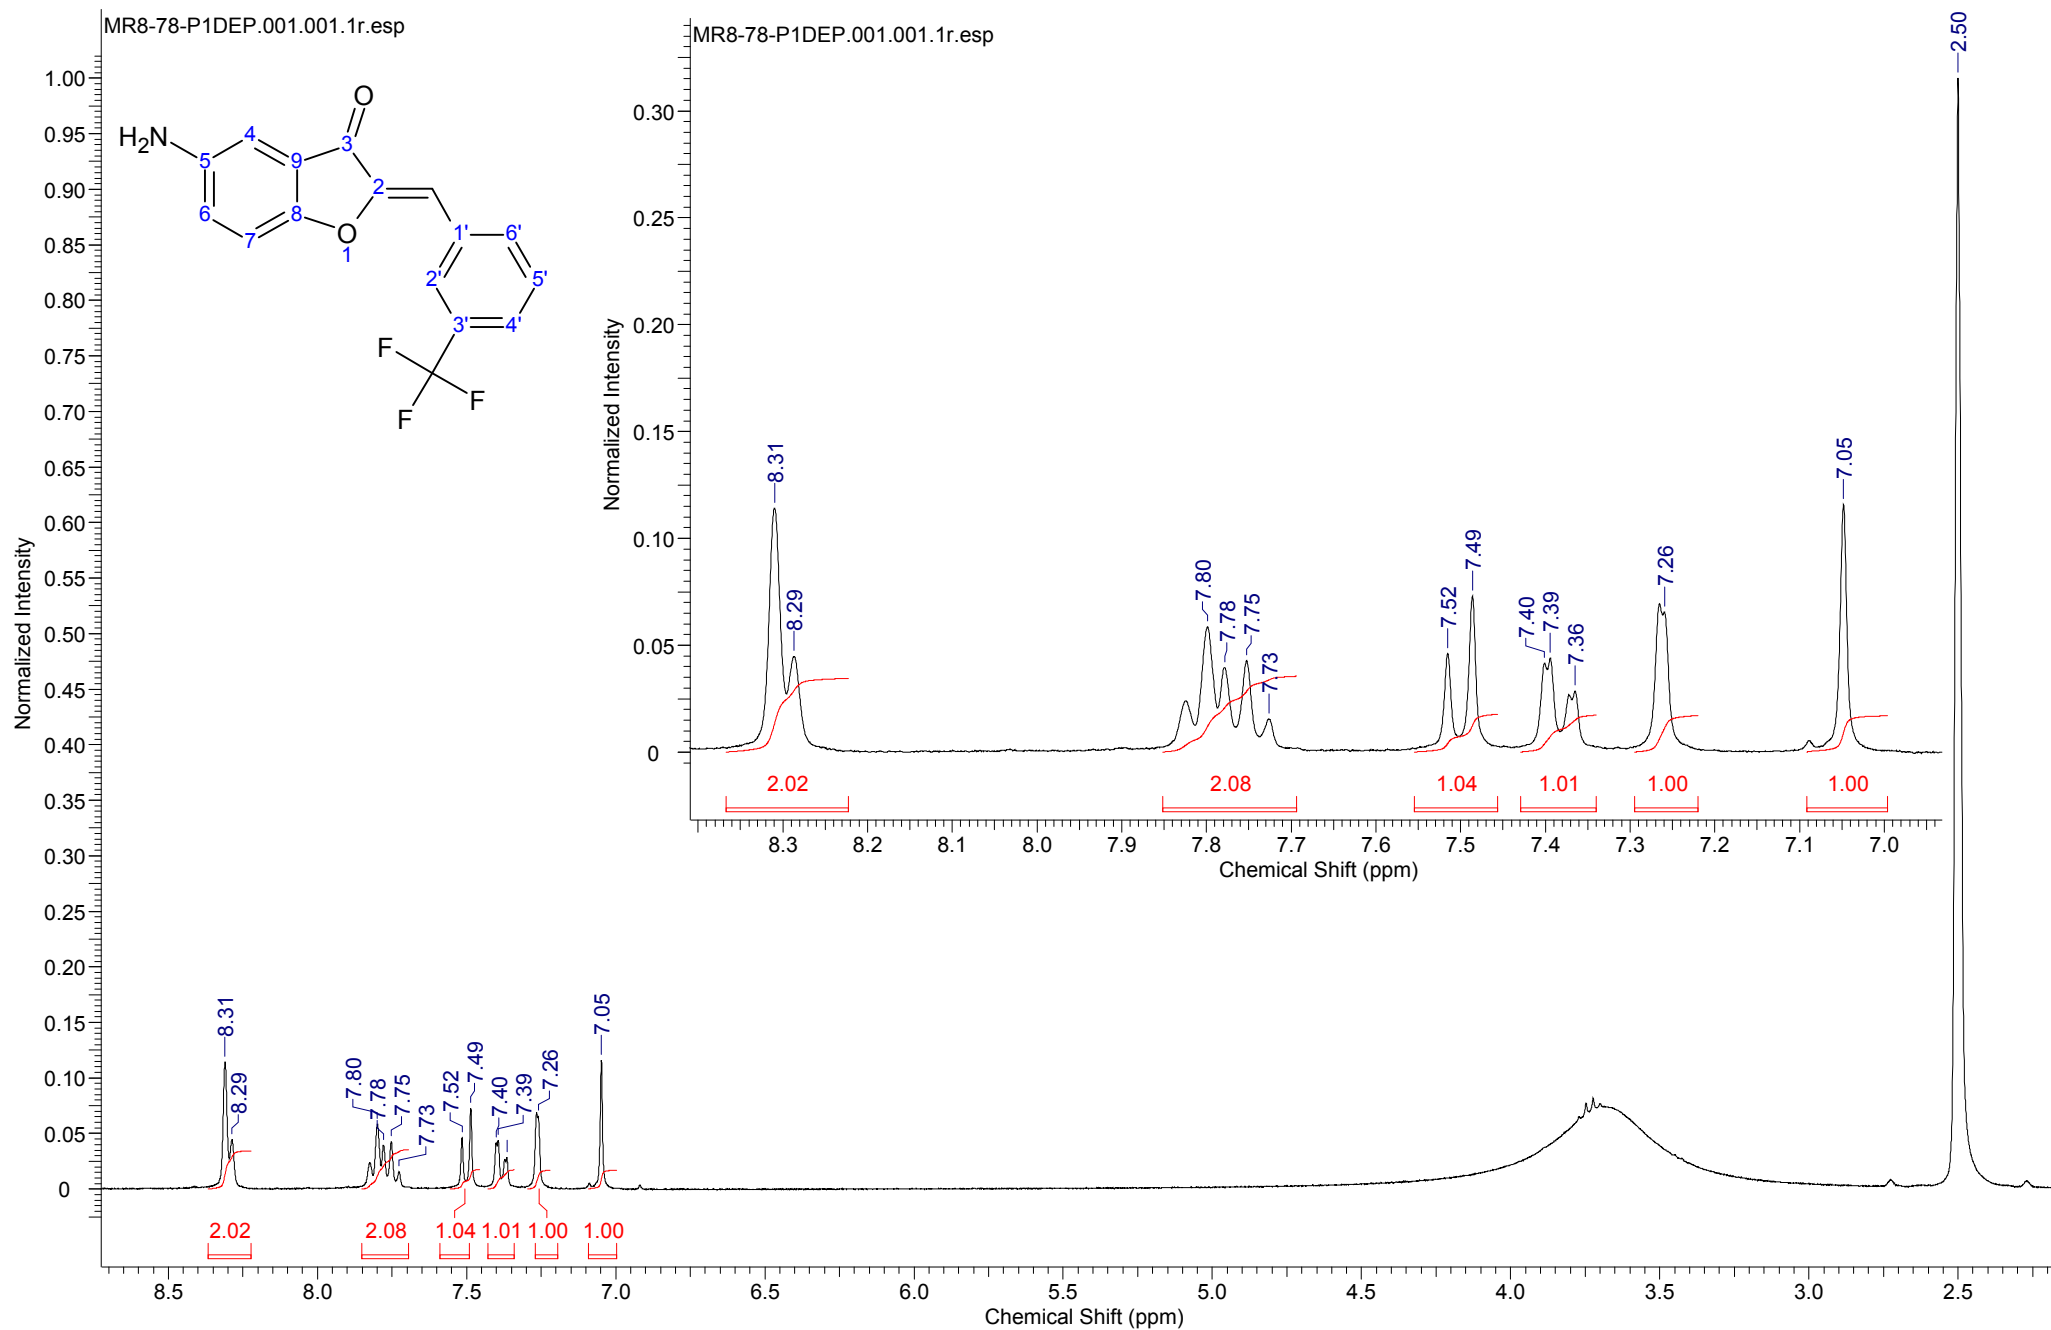

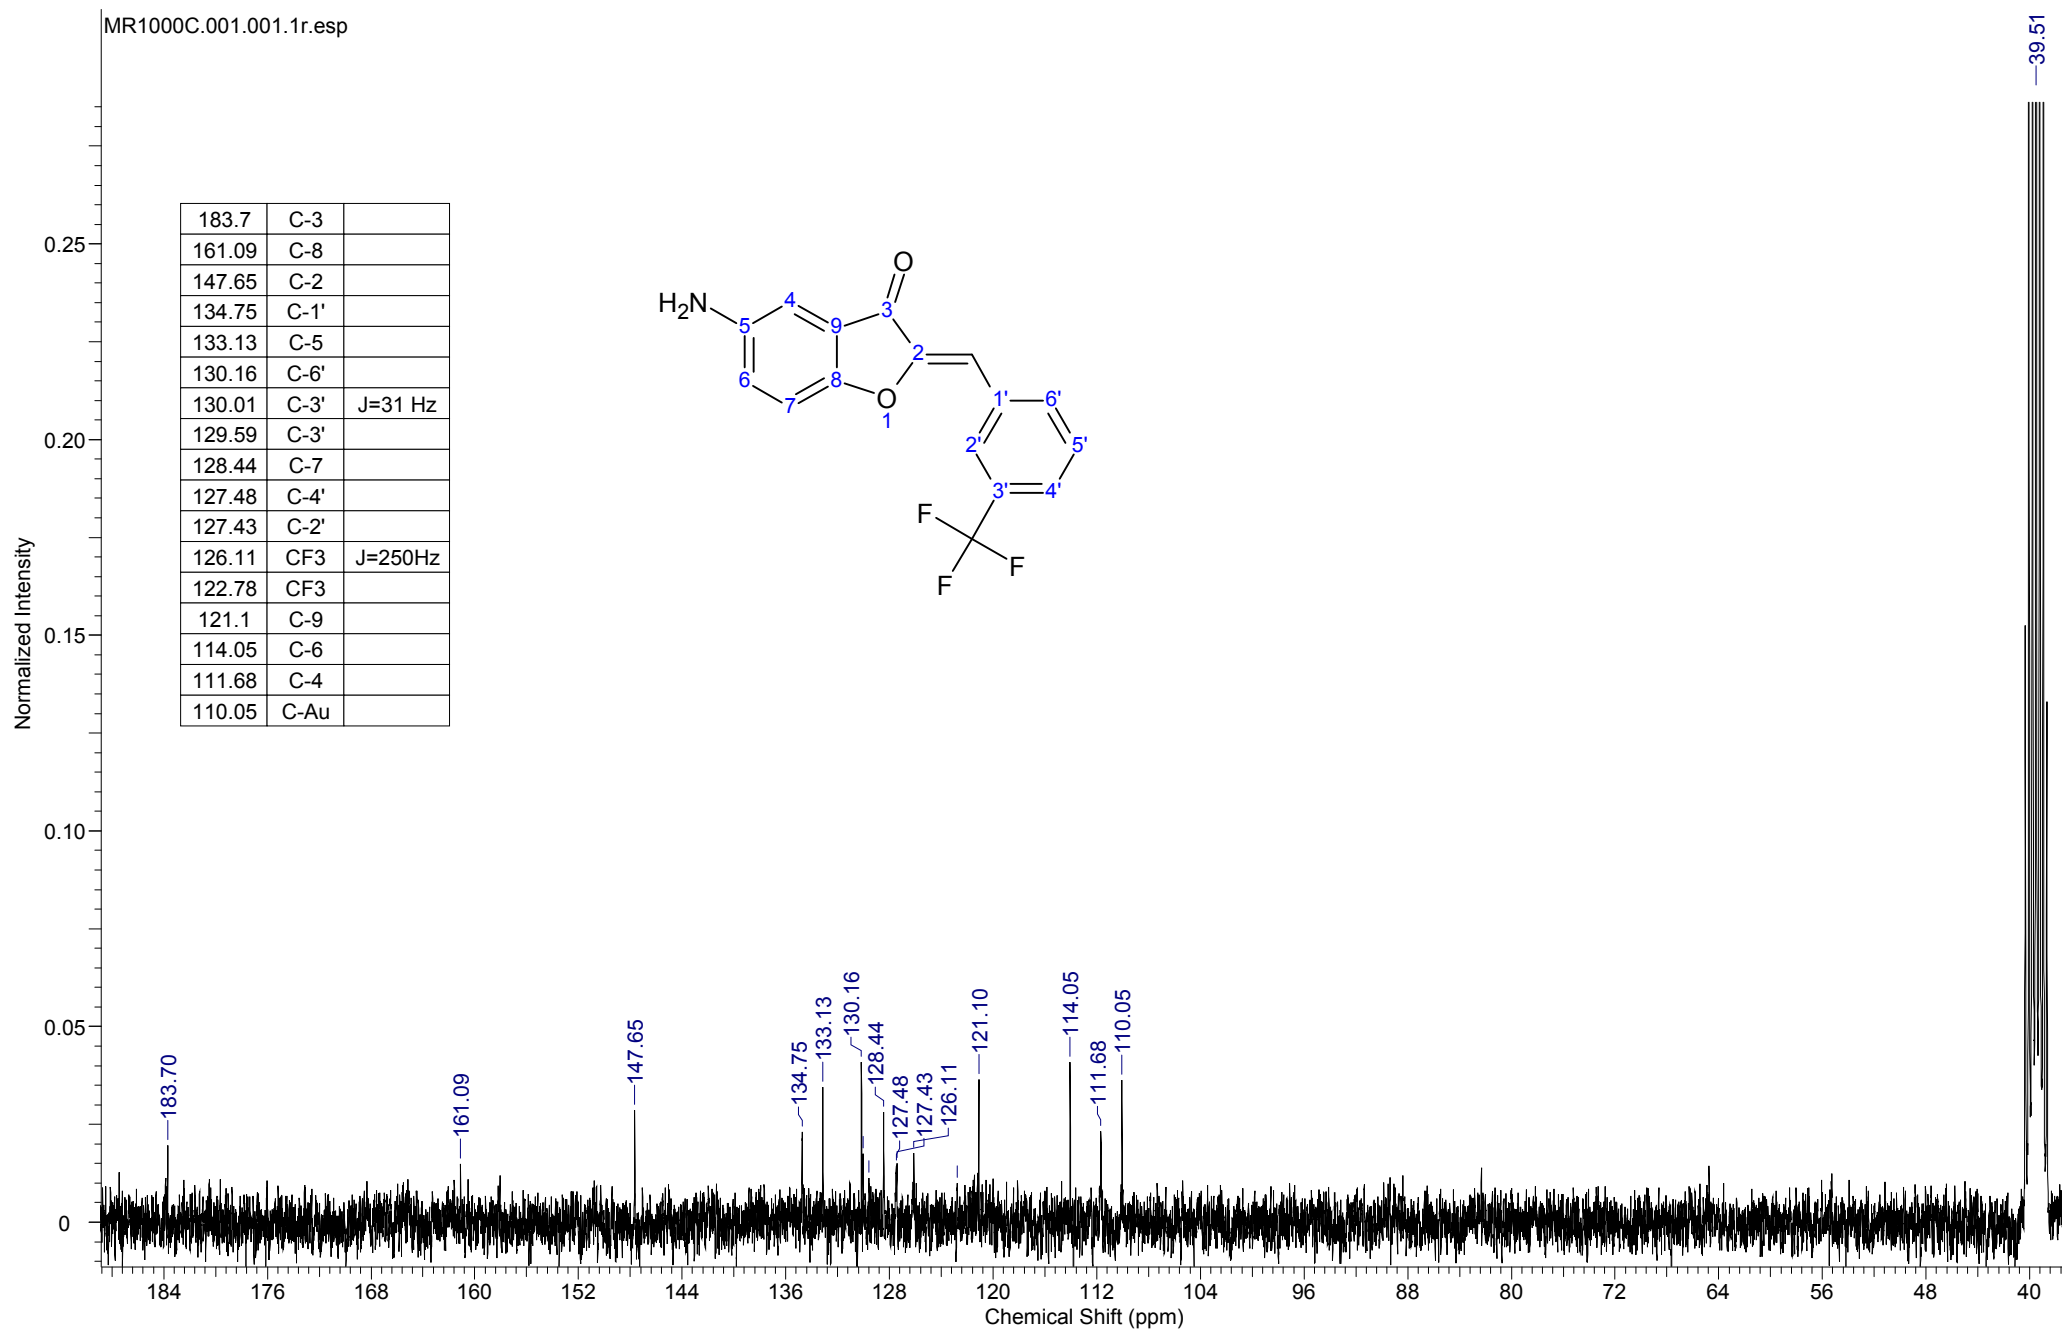

4-*[(Z)-[5-(acetylamino)-3-oxo-1-benzofuran-2(3*H*)-ylidene]methyl]benzoic acid*

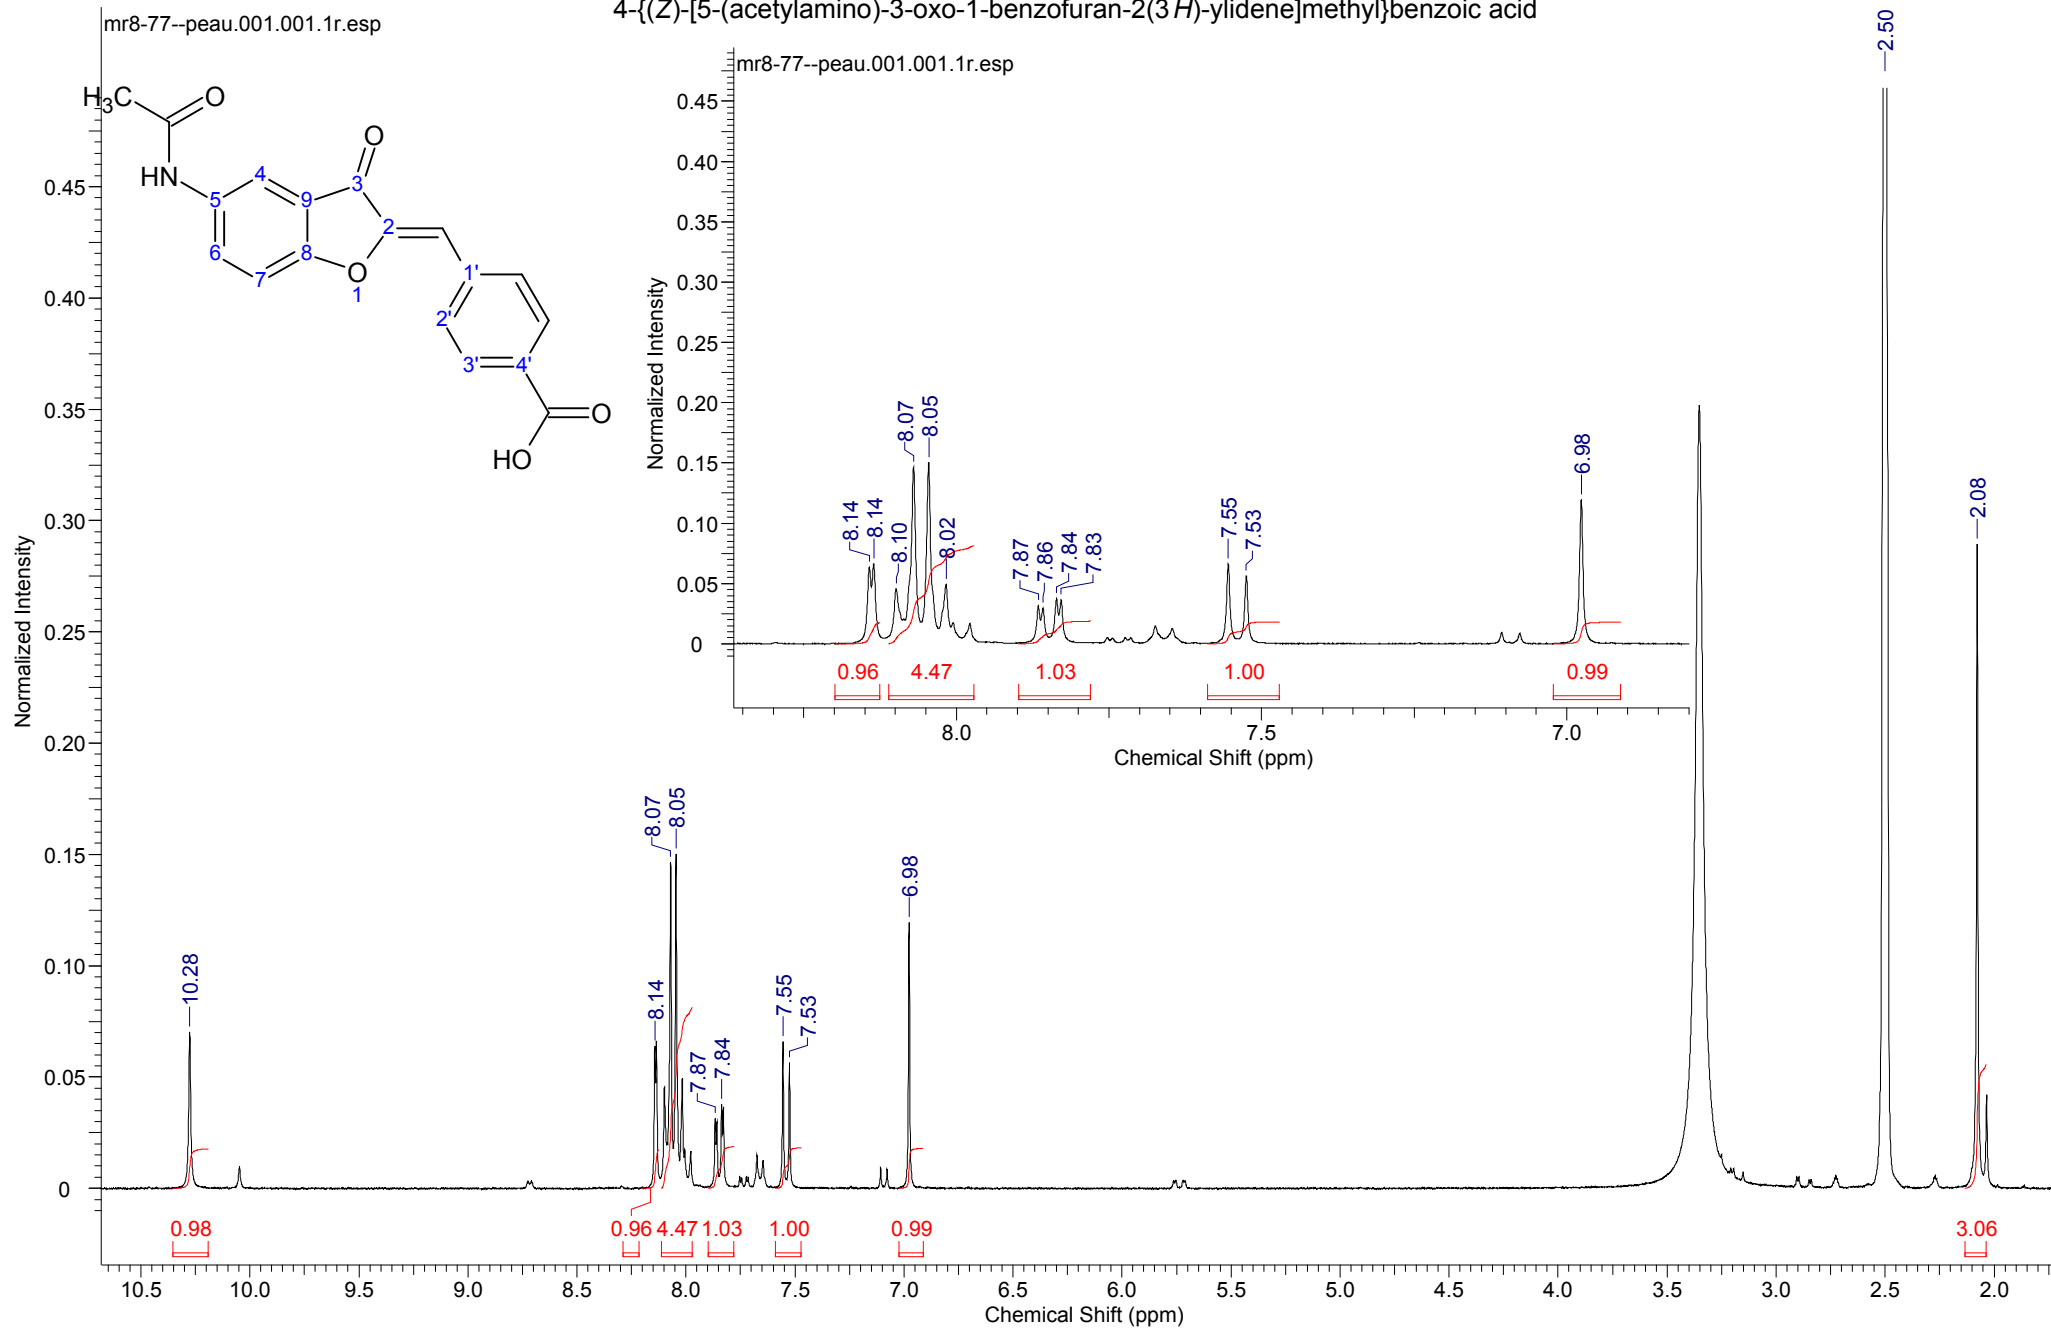



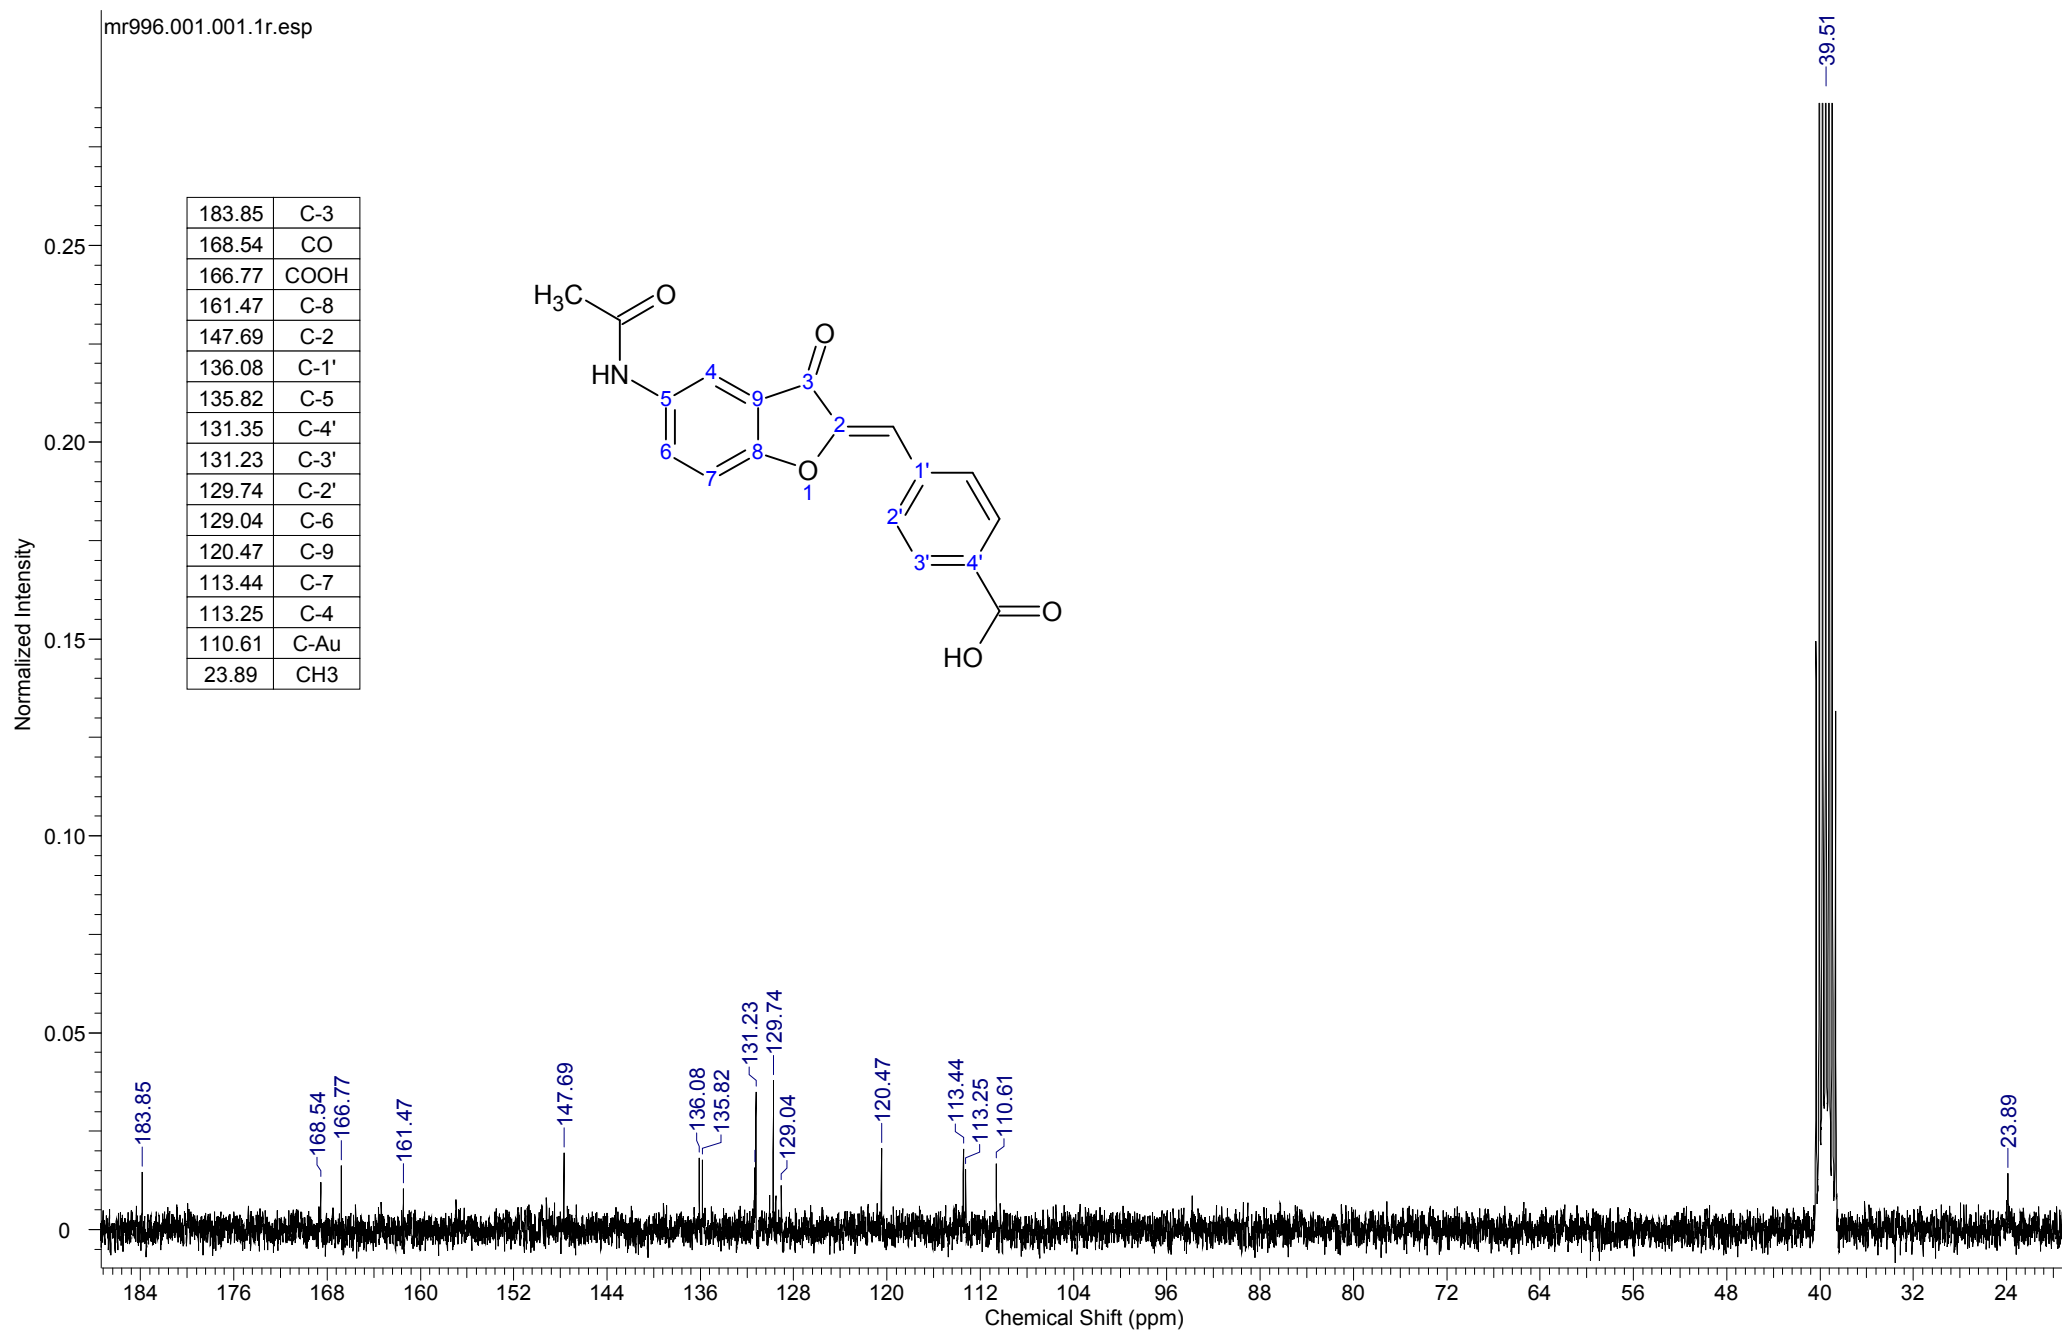

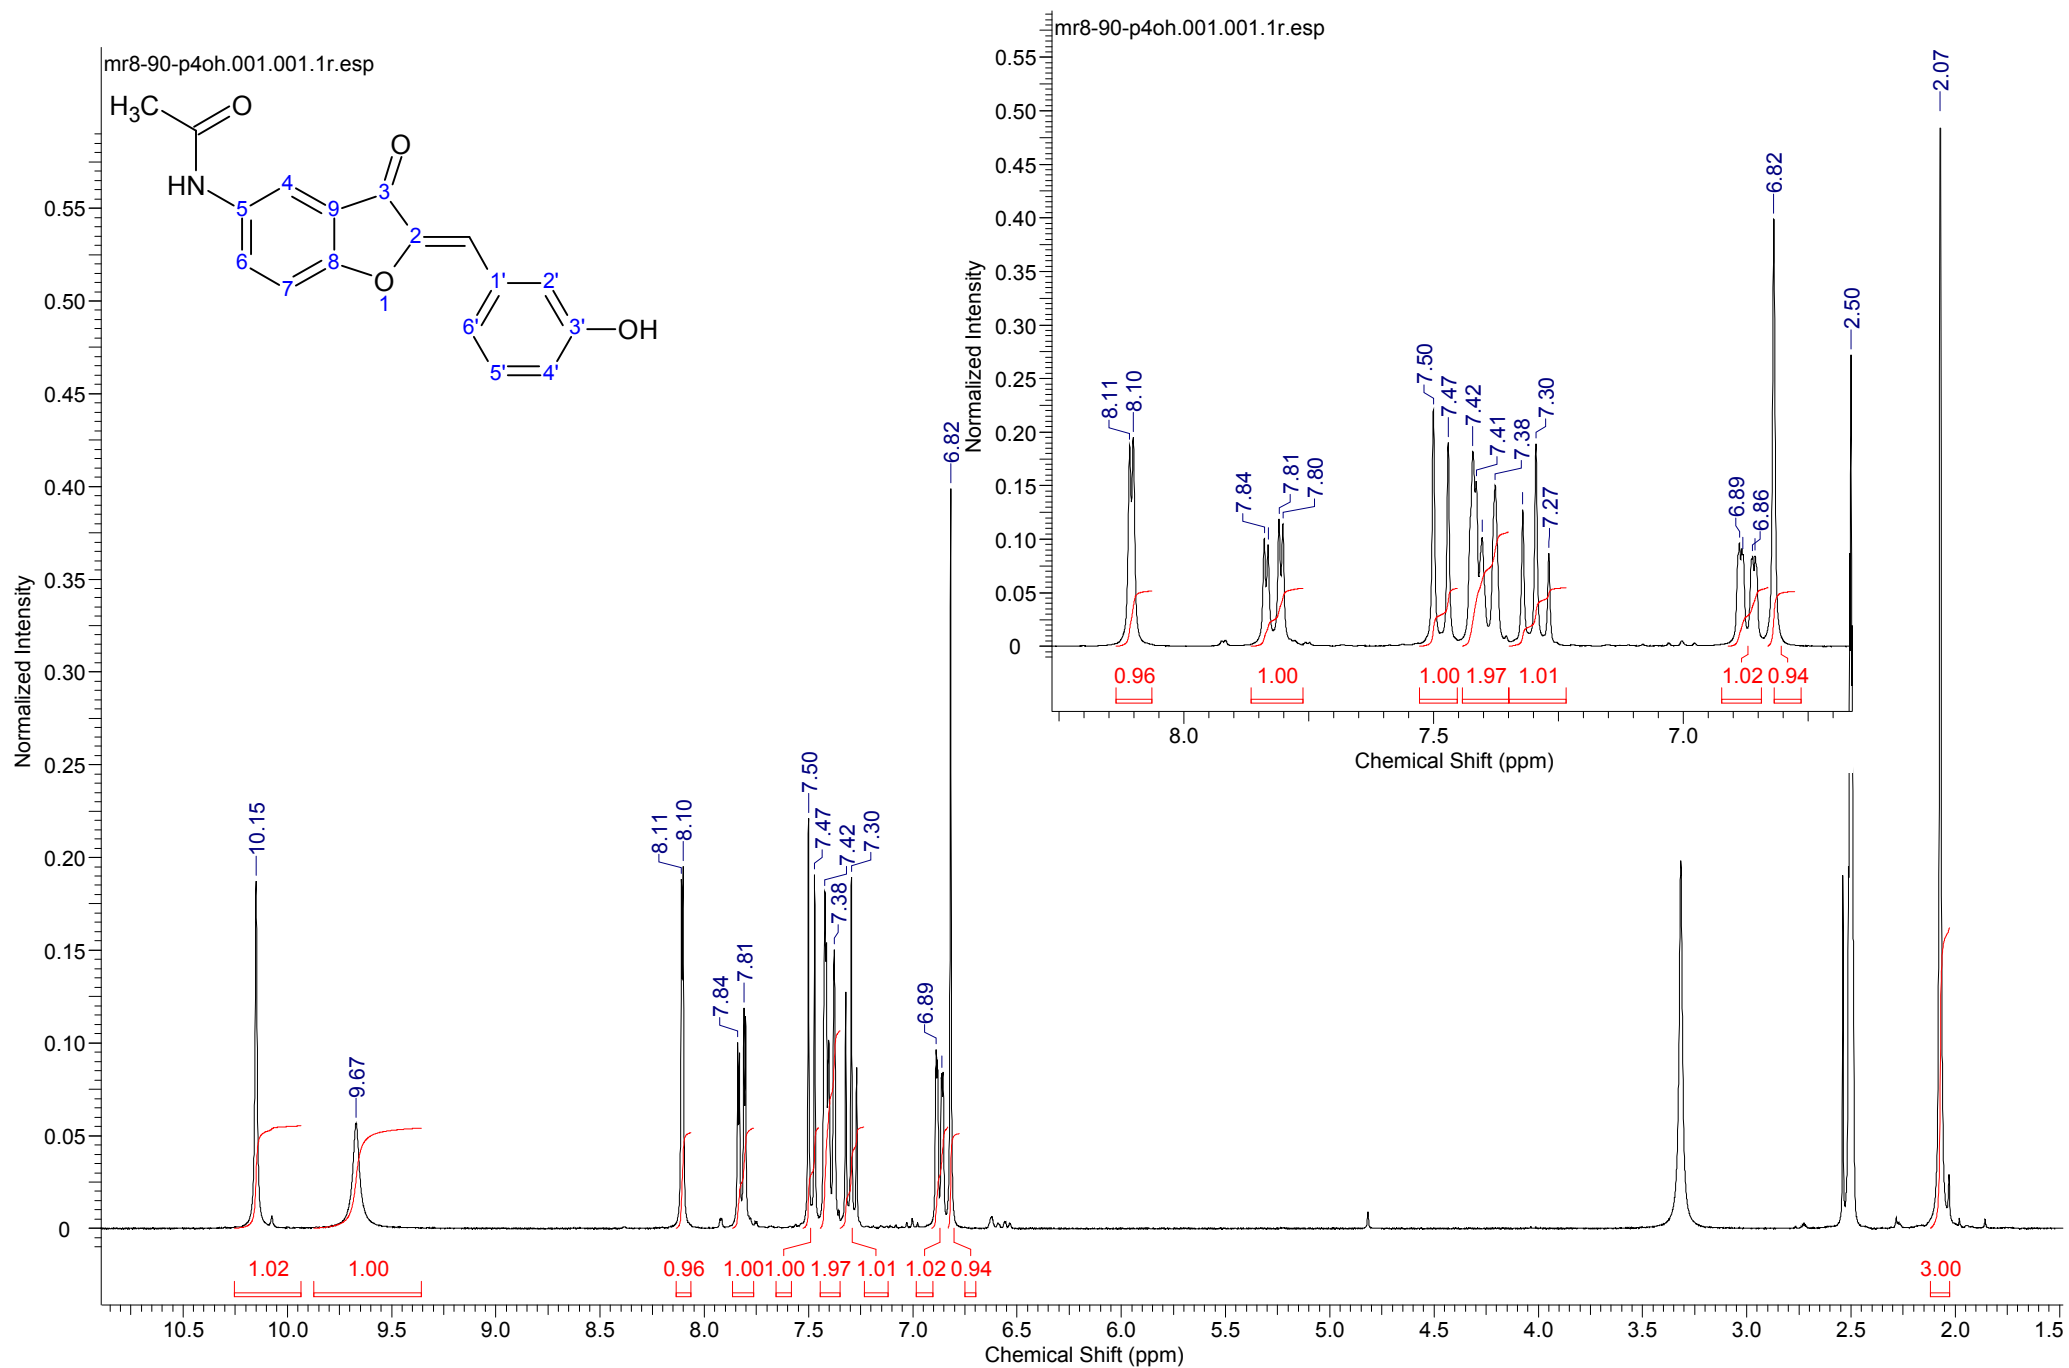

MR8-90-P4OHC.001.001.1r.esp

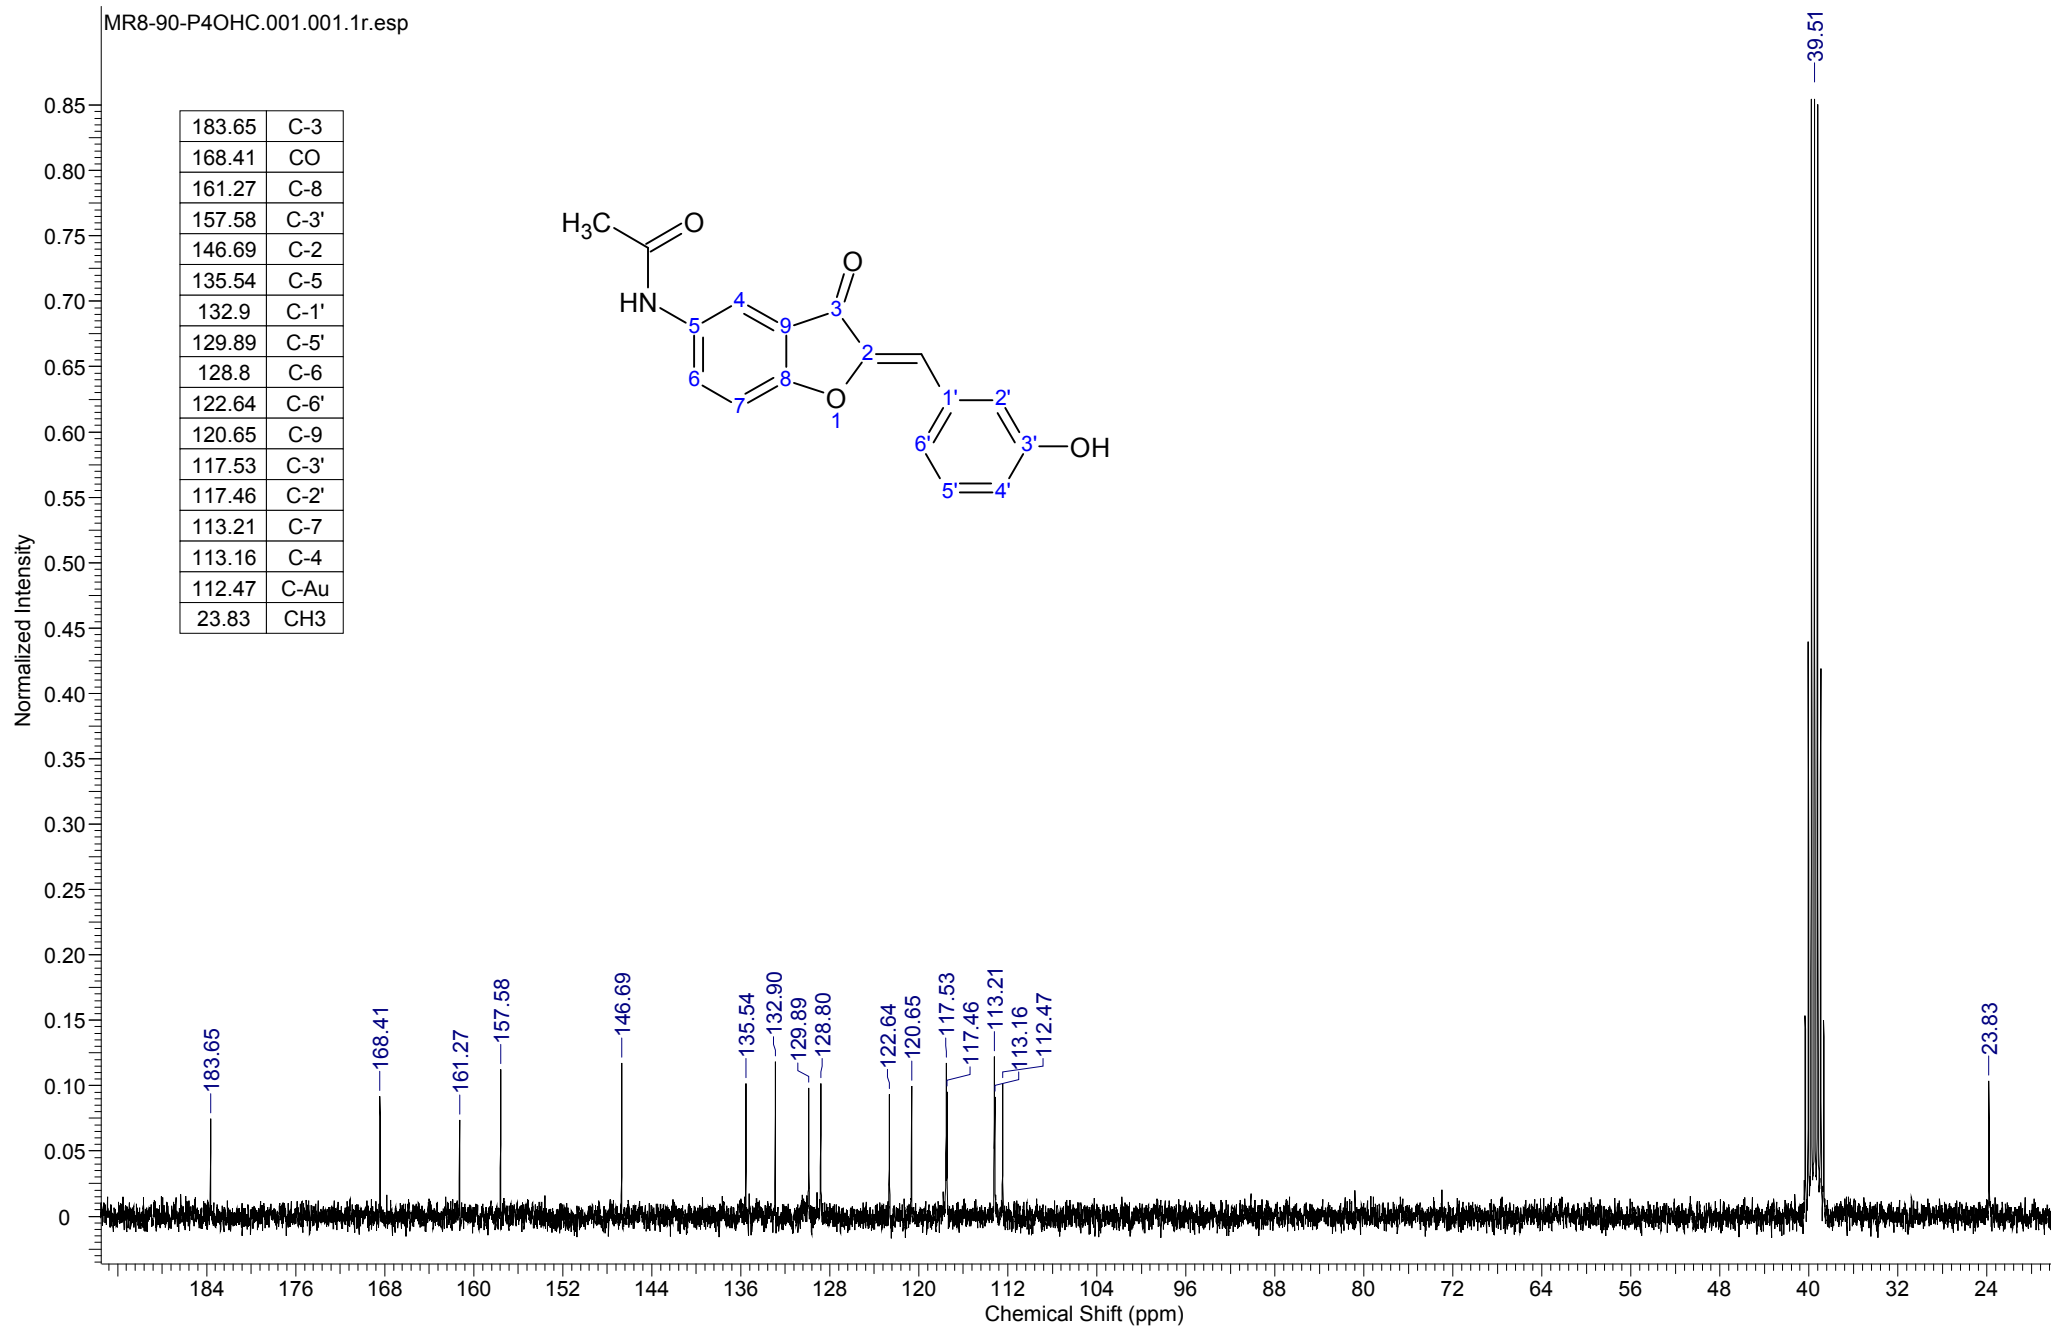

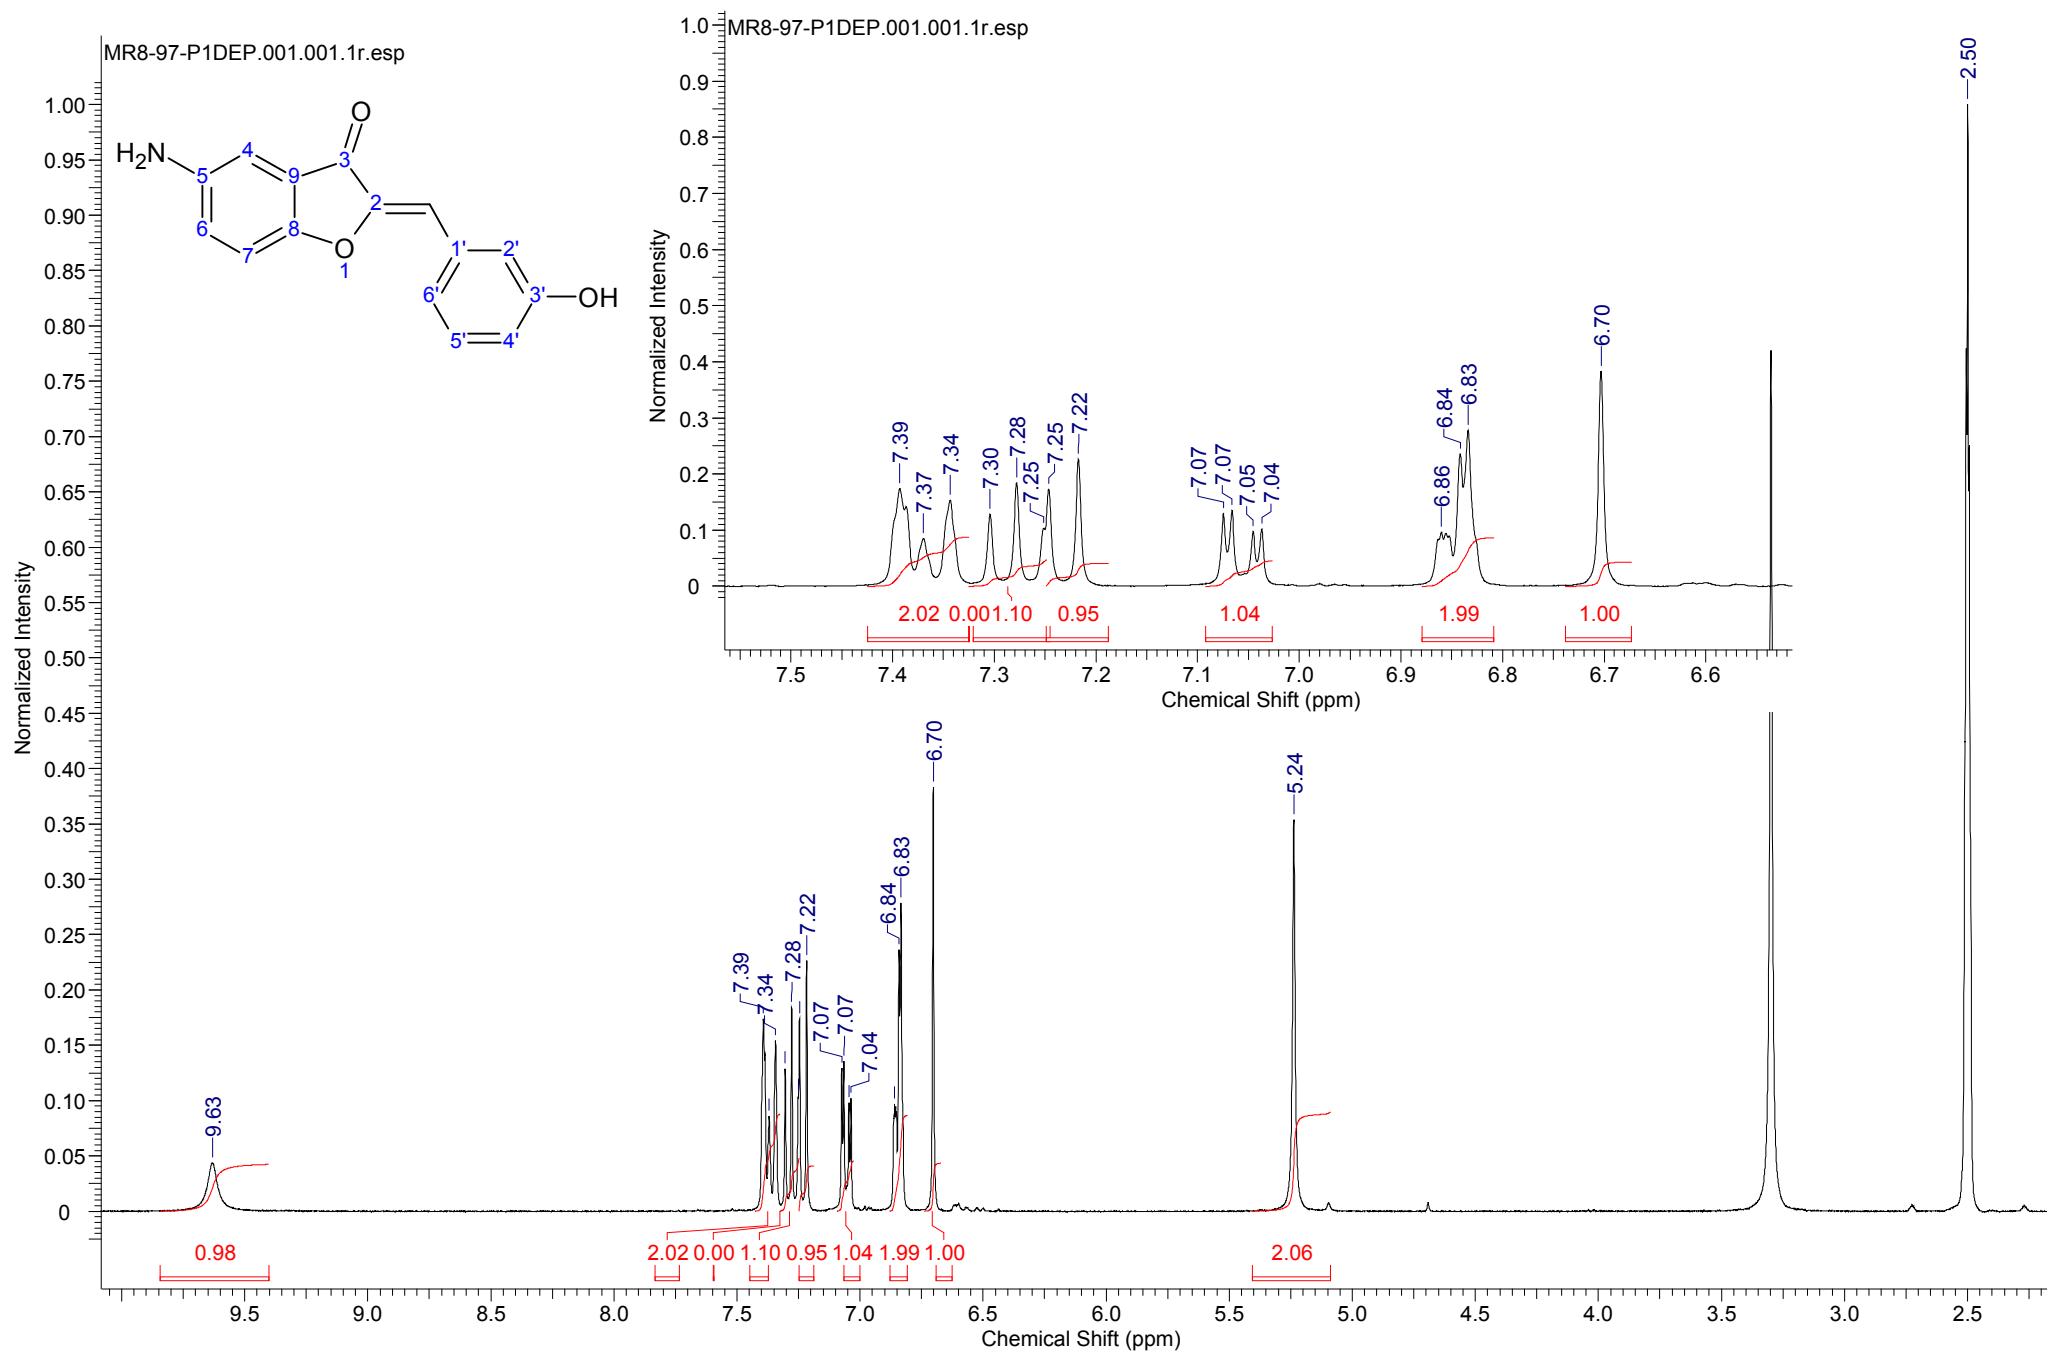

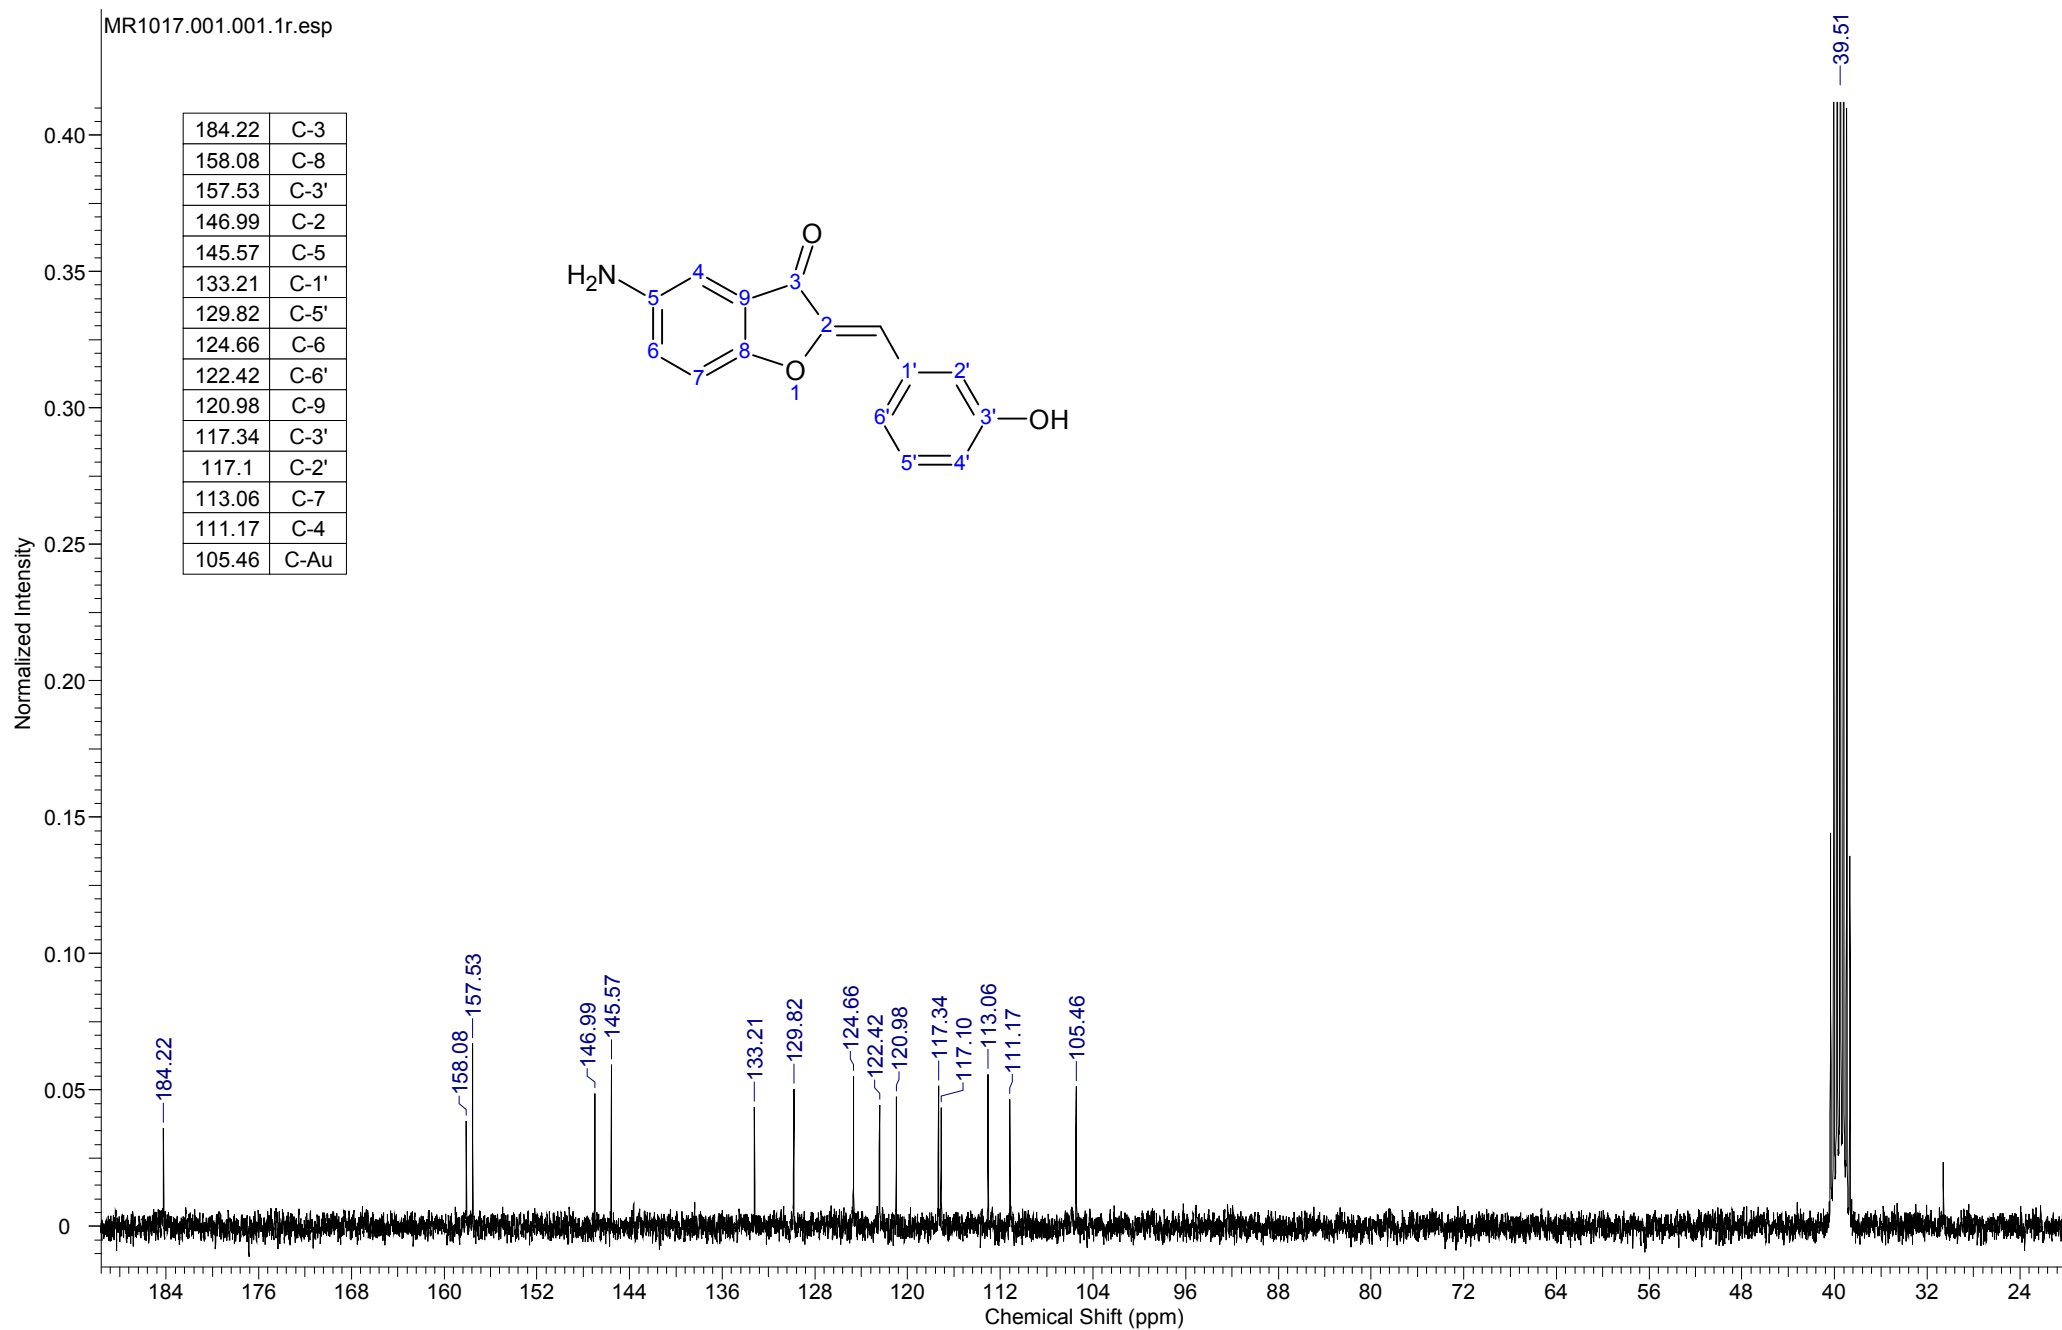

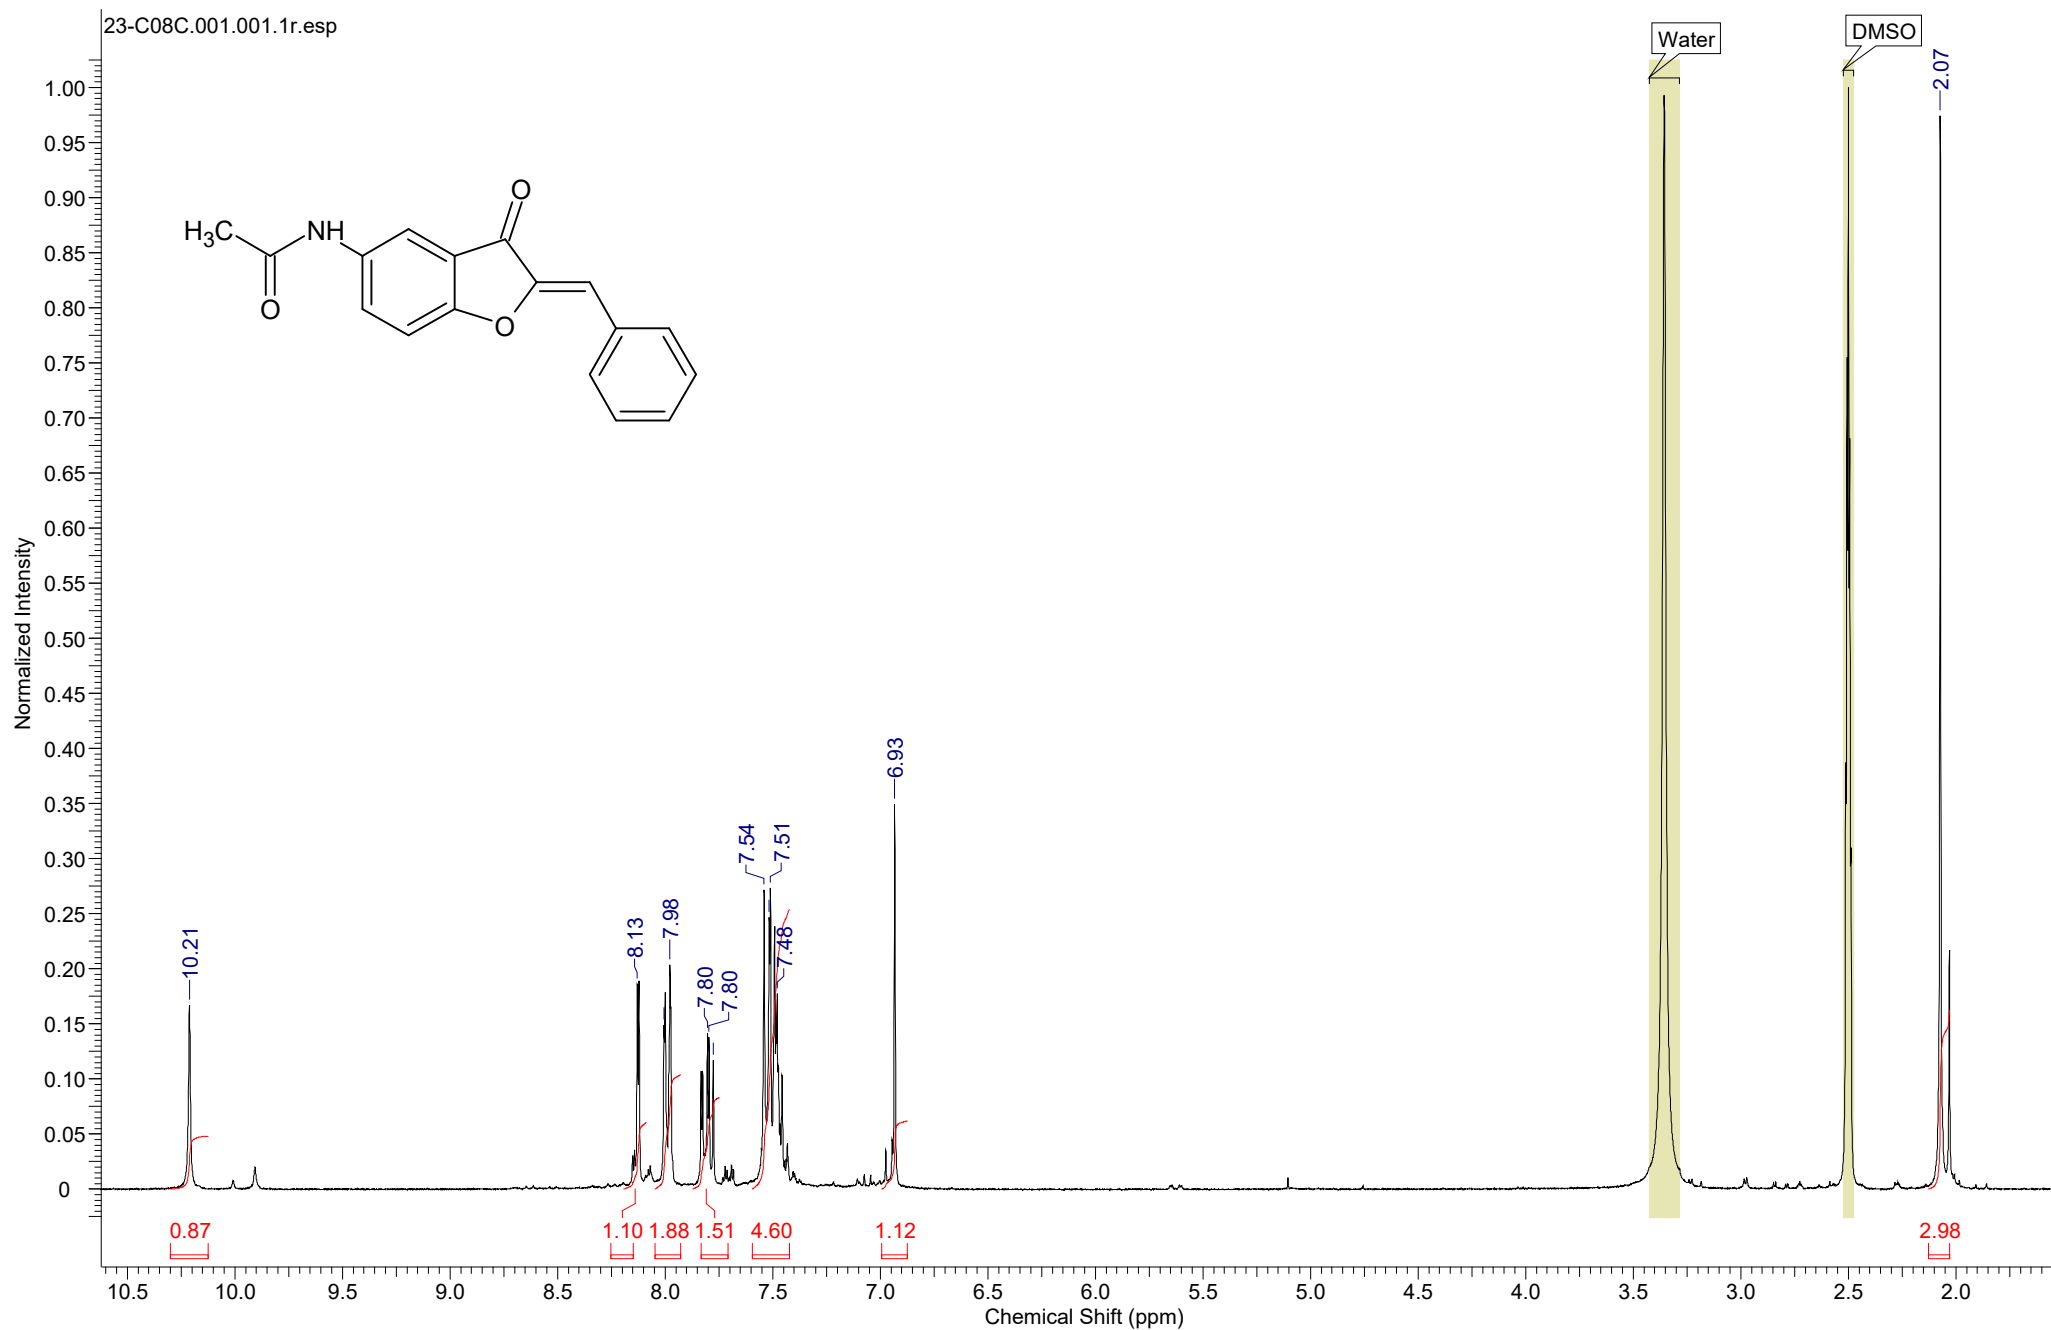

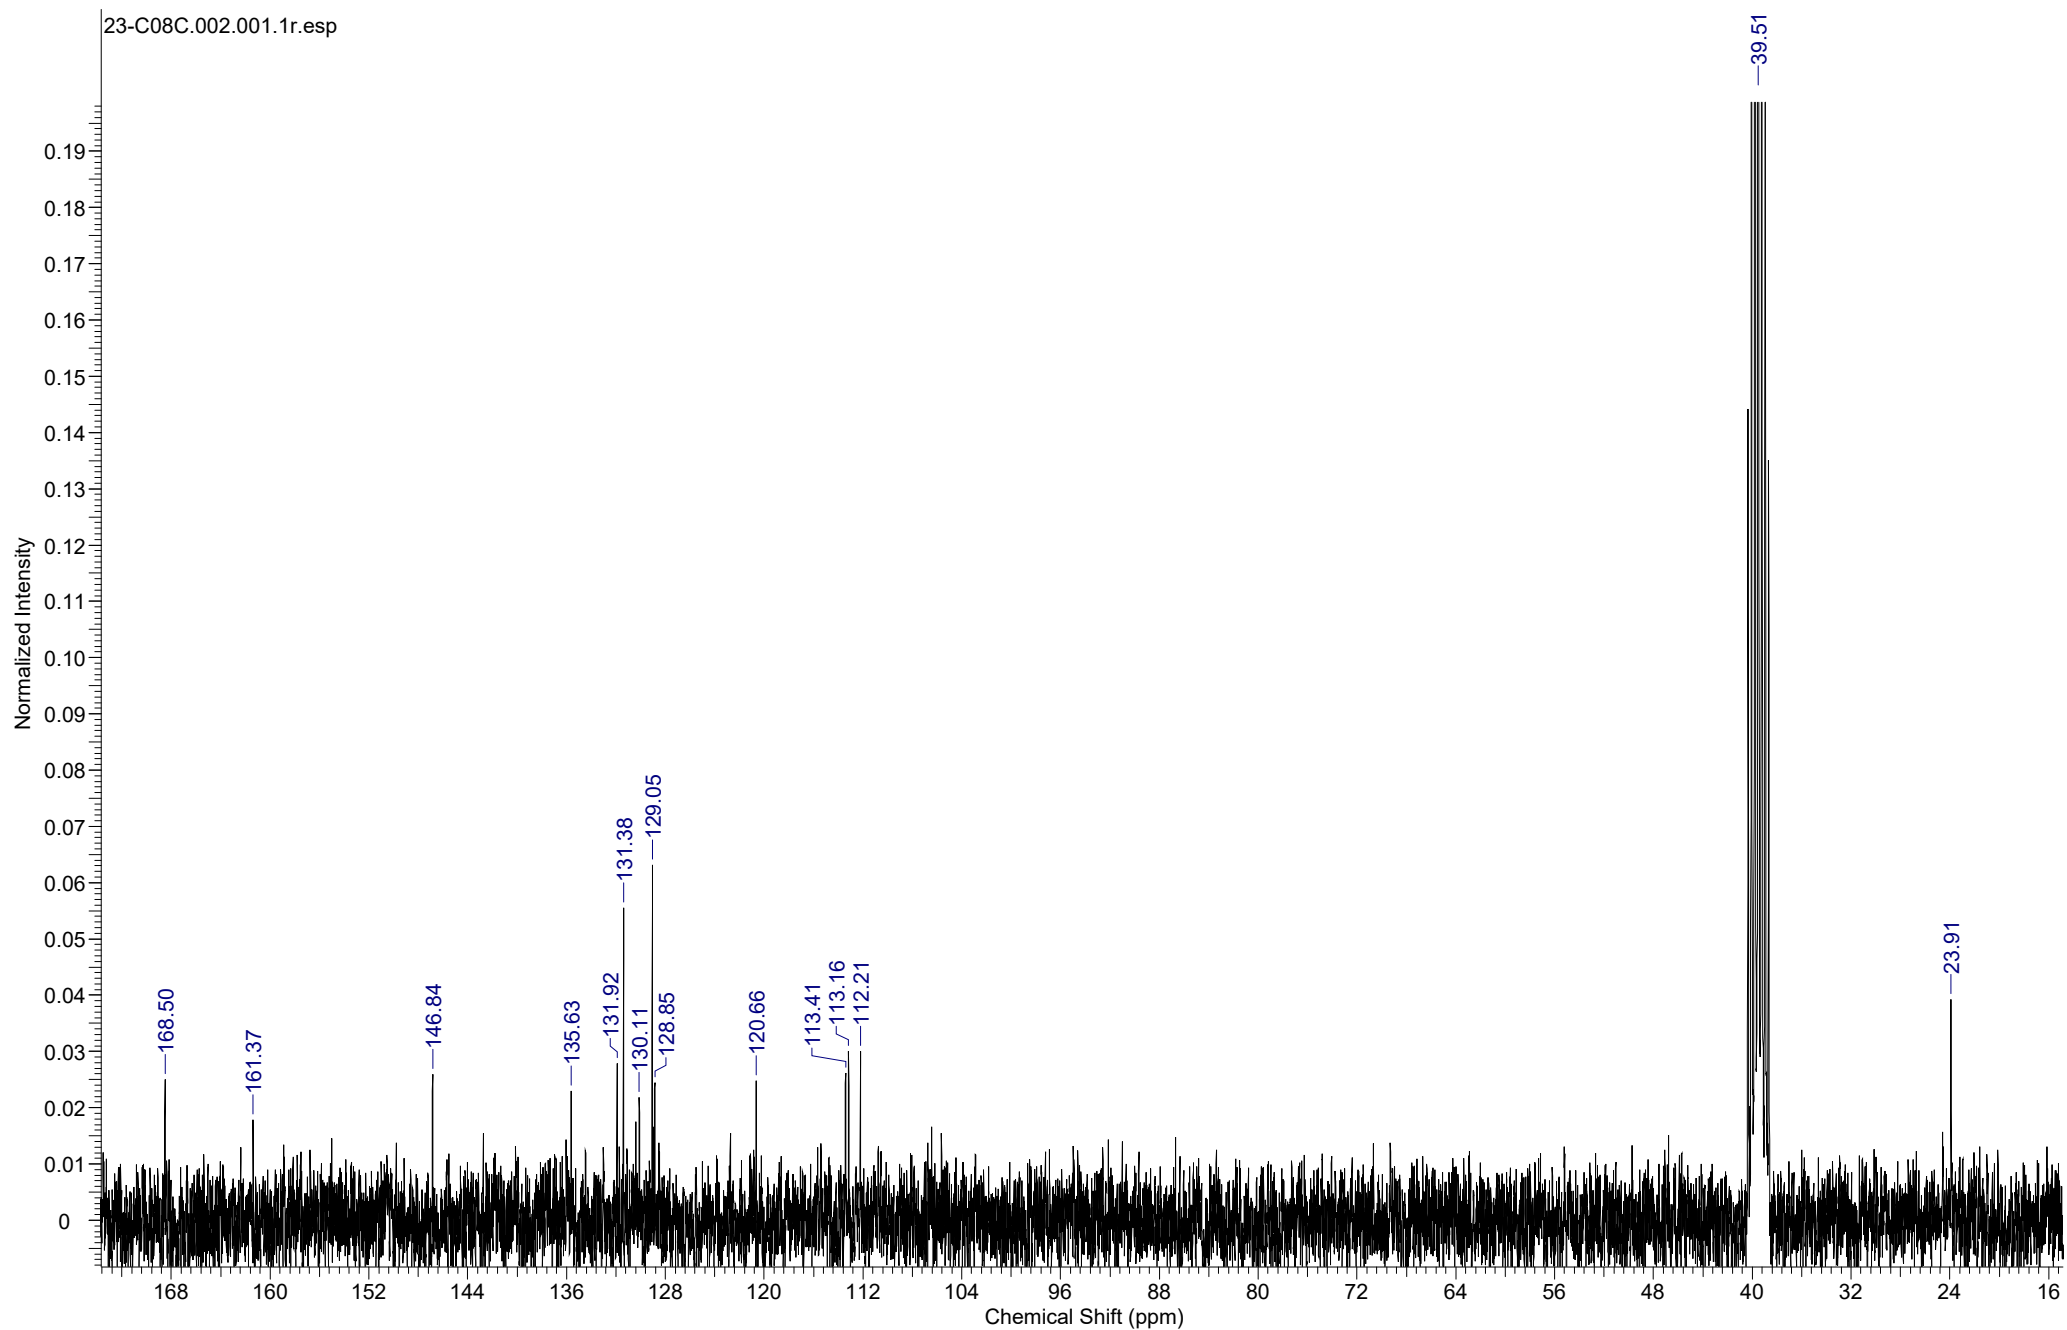

Supplement: s1 [file s1]
